# Supplementary material for: Motif models proposing independent and interdependent impacts of nucleotides are related to high and low affinity transcription factor binding sites in Arabidopsis
Source: Front Plant Sci. 2022 Jul 28;13:938545. doi: 10.3389/fpls.2022.938545 (PMC9373801; doi:10.3389/fpls.2022.938545)
Supplement: Supplementary file 3 [file Data_Sheet_3.xlsx]

## Sheet: Supplementary Table S1
Supplementary Table S1. The benchmark collection of 111 ChIP-seq datasets supported by additional input control experiments. The collection compiles datasets from GTRD for A. thaliana. We each dataset we defined the respective target TF and computed the fold enrichment as the ratio of the fraction of recognized PWM motifs in the foreground set (peaks) to that for the background set. The backgound…
GTRD ID	TF	CIS-BP motif ID	Motif Source	Enrichment
PEAKS042938	ABF1	M01773_2.00	PBM	5.327384229
PEAKS042939	ABF1	M01772_2.00	PBM	2.902178145
PEAKS042900	ABF3	M01782_2.00	PBM	5.355895539
PEAKS042901	ABF3	M01782_2.00	PBM	3.944174636
PEAKS042902	ABF4	M01056_2.00	PBM	5.333625022
PEAKS042903	ABF4	M01056_2.00	PBM	4.393425903
PEAKS042822	AGL27	M08145_2.00	JASPAR	3.103121368
PEAKS042553	AGL8	M02696_2.00	JASPAR	1.968769242
PEAKS042554	AGL8	M02696_2.00	JASPAR	1.989875971
PEAKS042897	AGL8	M08424_2.00	JASPAR	2.656702442
PEAKS042817	AP1	M08144_2.00	JASPAR	2.385546288
PEAKS042818	AP1	M08144_2.00	JASPAR	2.130953418
PEAKS042819	AP1	M08144_2.00	JASPAR	1.188396619
PEAKS042765	AP2	M00845_2.00	PBM	1.174317218
PEAKS042831	ARF6	M00852_2.00	PBM	4.09117049
PEAKS046123	ARR1	M02296_2.00	PBM	1.714218596
PEAKS046124	ARR1	M02296_2.00	PBM	1.451607571
PEAKS046125	ARR1	M02296_2.00	PBM	1.810977679
PEAKS046126	ARR1	M02296_2.00	PBM	1.044255
PEAKS046127	ARR1	M02296_2.00	PBM	1.728384713
PEAKS046128	ARR1	M02296_2.00	PBM	1.321671275
PEAKS046129	ARR10	M02702_2.00	JASPAR	1.390442471
PEAKS046130	ARR12	M01278_2.00	PBM	1.206991185
PEAKS046131	ARR12	M01278_2.00	PBM	1.630676958
PEAKS046132	ARR14	M00873_2.00	PBM	1.492007348
PEAKS042912	ATHB-5	M06932_2.00	Dap-seq	1.997821068
PEAKS042913	ATHB-5	M06933_2.00	Dap-seq	1.948654436
PEAKS042910	ATHB-6	M06910_2.00	Dap-seq	1.563385196
PEAKS042911	ATHB-6	M06910_2.00	Dap-seq	1.399894737
PEAKS042904	ATHB-7	M06911_2.00	Dap-seq	1.957444296
PEAKS042905	ATHB-7	M06911_2.00	Dap-seq	1.595993198
PEAKS042945	AZF1	M01860_2.00	PBM	1.24482726
PEAKS042833	BBM	M06622_2.00	Dap-seq	1.71788299
PEAKS042834	BBM	M06622_2.00	Dap-seq	1.6195769
PEAKS042924	BHLH122	M06724_2.00	Dap-seq	1.305350632
PEAKS042925	BHLH122	M06725_2.00	Dap-seq	1.216071724
PEAKS042946	BPC1	M06715_2.00	Dap-seq	2.731885526
PEAKS042880	CCA1	M00875_2.00	PBM	3.544393217
PEAKS042881	CCA1	M00875_2.00	PBM	10.5064223
PEAKS042882	CCA1	M00875_2.00	PBM	5.849139694
PEAKS042920	DREB2A	M06655_2.00	Dap-seq	2.783020684
PEAKS042921	DREB2A	M06656_2.00	Dap-seq	1.243009048
PEAKS042826	ERF115	M06658_2.00	Dap-seq	4.483259103
PEAKS042875	FHY3	M09540_2.00	Misc	6.939773955
PEAKS042928	GBF2	M01781_2.00	PBM	3.14312243
PEAKS042929	GBF2	M01781_2.00	PBM	3.374531919
PEAKS042936	GBF3	M06770_2.00	Dap-seq	3.455548227
PEAKS042937	GBF3	M06770_2.00	Dap-seq	4.080031753
PEAKS042926	HAT22	M06926_2.00	Dap-seq	1.85087799
PEAKS042927	HAT22	M06926_2.00	Dap-seq	1.699216983
PEAKS042890	HSFA1A	M00869_2.00	PBM	1.30301696
PEAKS042891	HSFA1A	M06950_2.00	Dap-seq	1.454045321
PEAKS042892	HSFA1A	M06947_2.00	Dap-seq	2.087417997
PEAKS046116	HSFA1B	M06948_2.00	Dap-seq	1.118282799
PEAKS046117	HSFA1B	M06948_2.00	Dap-seq	1.228993246
PEAKS042917	HSFA6A	M06950_2.00	Dap-seq	2.45448035
PEAKS046121	HY5	M08407_2.00	JASPAR	3.78630602
PEAKS046122	HY5	M08407_2.00	JASPAR	4.808622799
PEAKS050107	IDD4	M06809_2.00	Dap-seq	5.057097278
PEAKS042821	KAN1	M00878_2.00	PBM	1.840779443
PEAKS042981	LFY	M02692_2.00	JASPAR	9.168494185
PEAKS042832	LHY	M06997_2.00	Dap-seq	3.048701382
PEAKS042922	MYB3	M02288_2.00	PBM	1.818160486
PEAKS042923	MYB3	M02288_2.00	PBM	1.580514838
PEAKS042914	MYB44	M01082_2.00	PBM	1.571711896
PEAKS042915	MYB44	M01082_2.00	PBM	1.402170869
PEAKS058394	MYC2	M01699_2.00	PBM	10.47252793
PEAKS042932	NAC032	M07159_2.00	Dap-seq	3.493442207
PEAKS042933	NAC032	M02368_2.00	PBM	1.848260005
PEAKS042804	PIF1	M01703_2.00	PBM	24.72517805
PEAKS042805	PIF1	M01703_2.00	PBM	14.2204002
PEAKS042806	PIF1	M01703_2.00	PBM	18.11764206
PEAKS042779	PIF4	M08046_2.00	JASPAR	13.10070607
PEAKS042809	PIF4	M08046_2.00	JASPAR	15.58376055
PEAKS042873	PIF4	M08046_2.00	JASPAR	3.901141292
PEAKS042778	PIF5	M09452_2.00	Misc	12.89334251
PEAKS042874	PIF5	M09452_2.00	Misc	4.768717287
PEAKS042863	REF6	M08081_2.00	JASPAR	7.711879942
PEAKS042988	REF6	M08081_2.00	JASPAR	5.019816025
PEAKS042991	REF6	M08081_2.00	JASPAR	5.612134837
PEAKS042992	REF6	M08081_2.00	JASPAR	5.811975895
PEAKS047354	REF6	M08081_2.00	JASPAR	6.345651171
PEAKS047355	REF6	M08081_2.00	JASPAR	5.284437737
PEAKS047357	REF6	M08081_2.00	JASPAR	1.612390052
PEAKS042771	REV	M06898_2.00	Dap-seq	2.753590025
PEAKS042815	SEP3	M08143_2.00	JASPAR	1.89304696
PEAKS042816	SEP3	M08143_2.00	JASPAR	1.893145028
PEAKS042820	SEP3	M08143_2.00	JASPAR	2.267815466
PEAKS042884	SOC1	M08425_2.00	JASPAR	5.62243595
PEAKS055375	TCP4	M02501_2.00	PBM	2.194377682
PEAKS055376	TCP4	M02501_2.00	PBM	4.994444013
PEAKS042876	TRB1	M01070_2.00	PBM	3.258821949
PEAKS042877	TRB1	M01070_2.00	PBM	5.196922578
PEAKS042949	WRKY18	M07417_2.00	Dap-seq	2.448548761
PEAKS042950	WRKY18	M07417_2.00	Dap-seq	2.838281138
PEAKS042955	WRKY18	M07416_2.00	Dap-seq	2.401980329
PEAKS042956	WRKY18	M07417_2.00	Dap-seq	2.218287386
PEAKS042868	WRKY33	M02554_2.00	PBM	1.519576635
PEAKS042869	WRKY33	M07391_2.00	Dap-seq	2.324340308
PEAKS042947	WRKY33	M07391_2.00	Dap-seq	2.64257494
PEAKS042948	WRKY33	M07391_2.00	Dap-seq	3.132591443
PEAKS042953	WRKY33	M02554_2.00	PBM	2.13718659
PEAKS042954	WRKY33	M07391_2.00	Dap-seq	2.562467089
PEAKS042951	WRKY40	M07380_2.00	Dap-seq	1.355211374
PEAKS042952	WRKY40	M07380_2.00	Dap-seq	3.053510998
PEAKS042957	WRKY40	M07380_2.00	Dap-seq	2.176792158
PEAKS042958	WRKY40	M07380_2.00	Dap-seq	2.351561843
PEAKS058162	WUS	M06905_2.00	Dap-seq	1.457581252
PEAKS058163	WUS	M06905_2.00	Dap-seq	2.670760234
PEAKS042908	ZAT6	M00861_2.00	PBM	0.926938973
PEAKS042909	ZAT6	M00861_2.00	PBM	0.987540196

## Sheet: Supplementary Table S2
Supplementary Table S2. Performance estimates pAUC and parameters for PWM, BaMM and SiteGA models for benchmark ChIP-seq collection according to the cross-validation procedure.
GTRD ID	TF	PWM		BaMM			SiteGA
		Length, nt	pAUC	Length, nt	Order of Markov chain	pAUC	Length, nt	Number of LPDs	pAUC
PEAKS042938	ABF1	20	0.000892518	16	2	0.000924947	16	100	0.000874446
PEAKS042939	ABF1	20	0.000887218	12	2	0.000934194	16	80	0.000866423
PEAKS042900	ABF3	20	0.000943629	20	2	0.000953415	12	40	0.000884589
PEAKS042901	ABF3	20	0.000924249	20	2	0.000915124	20	100	0.000864212
PEAKS042902	ABF4	20	0.000898436	12	2	0.000955438	12	80	0.00089549
PEAKS042903	ABF4	20	0.000921951	12	3	0.000921995	12	40	0.000883213
PEAKS042822	AGL27	16	0.000572457	16	3	0.000655093	16	80	0.000474412
PEAKS042553	AGL8	16	0.000783927	16	3	0.000848301	8	60	0.000664858
PEAKS042554	AGL8	12	0.000665505	12	3	0.000665328	20	80	0.00061062
PEAKS042897	AGL8	12	0.000467249	12	1	0.000549696	16	80	0.000467728
PEAKS042817	AP1	12	0.00044016	16	3	0.000443943	12	100	0.000474338
PEAKS042818	AP1	12	0.000530262	12	3	0.00053673	12	80	0.000506383
PEAKS042819	AP1	12	0.000386192	12	3	0.000433539	16	60	0.000399438
PEAKS042765	AP2	8	0.000431006	8	2	0.000456116	12	60	0.000437038
PEAKS042831	ARF6	20	0.00052857	12	1	0.000544405	16	60	0.000491076
PEAKS046123	ARR1	16	0.000486565	12	1	0.00055153	16	100	0.000465814
PEAKS046124	ARR1	16	0.000670567	8	1	0.000688927	16	100	0.00058516
PEAKS046125	ARR1	16	0.00061171	12	2	0.00064484	12	80	0.000613219
PEAKS046126	ARR1	20	0.000714331	8	1	0.000771903	20	100	0.000693351
PEAKS046127	ARR1	12	0.000688852	12	1	0.000740355	12	80	0.000698776
PEAKS046128	ARR1	12	0.000706806	8	1	0.000719324	12	100	0.000656764
PEAKS046129	ARR10	16	0.00065836	8	1	0.000666519	16	60	0.000636595
PEAKS046130	ARR12	8	0.000615369	8	2	0.000649369	12	100	0.000629399
PEAKS046131	ARR12	12	0.000492336	12	1	0.000549729	20	100	0.000515732
PEAKS046132	ARR14	12	0.00064381	12	2	0.000722223	12	100	0.000681192
PEAKS042912	ATHB-5	12	0.000782305	12	2	0.000849338	12	80	0.000698767
PEAKS042913	ATHB-5	12	0.000814079	12	2	0.000852624	16	80	0.000691959
PEAKS042910	ATHB-6	8	0.000563689	8	2	0.000639511	16	60	0.000637772
PEAKS042911	ATHB-6	16	0.000726552	12	1	0.000752452	12	100	0.000755584
PEAKS042904	ATHB-7	12	0.000773732	12	2	0.000843532	16	60	0.000613303
PEAKS042905	ATHB-7	12	0.000677141	8	3	0.000769327	8	100	0.000686177
PEAKS042945	AZF1	16	0.000253618	16	1	0.000316815	12	100	0.000226791
PEAKS042833	BBM	8	0.000628056	8	2	0.000682744	8	100	0.000664301
PEAKS042834	BBM	8	0.000697757	8	3	0.000657046	12	80	0.000667636
PEAKS042924	BHLH122	16	0.000603816	12	3	0.000702742	12	80	0.000613612
PEAKS042925	BHLH122	20	0.000606161	16	1	0.000628131	12	60	0.000573911
PEAKS042946	BPC1	8	0.000290543	8	1	0.000290067	16	100	0.00033094
PEAKS042880	CCA1	8	0.000152909	8	3	0.000151358	12	80	0.000181403
PEAKS042881	CCA1	12	0.000689336	8	1	0.000715807	20	60	0.000475585
PEAKS042882	CCA1	16	0.000739696	8	1	0.000771991	16	40	0.000588475
PEAKS042920	DREB2A	12	0.000233368	8	3	0.000217945	16	100	0.000196801
PEAKS042921	DREB2A	12	0.000866892	12	1	0.000869795	20	100	0.000664199
PEAKS042826	ERF115	12	0.000575048	16	1	0.000555985	12	80	0.000464477
PEAKS042875	FHY3	20	0.000778775	16	2	0.000786208	12	80	0.000672075
PEAKS042928	GBF2	8	0.00091791	16	1	0.000958236	12	80	0.000910985
PEAKS042929	GBF2	12	0.000902125	16	1	0.00092217	20	60	0.000835758
PEAKS042936	GBF3	16	0.000923073	12	2	0.00091423	12	100	0.000915711
PEAKS042937	GBF3	16	0.000881226	16	3	0.000947086	16	40	0.000865462
PEAKS042926	HAT22	12	0.000781906	16	1	0.000832887	12	60	0.000736081
PEAKS042927	HAT22	12	0.000616275	16	1	0.000758205	16	80	0.000685028
PEAKS042890	HSFA1A	12	0.000529743	8	2	0.000528169	20	100	0.000561124
PEAKS042891	HSFA1A	12	0.000473189	8	3	0.000472805	12	60	0.000497563
PEAKS042892	HSFA1A	12	0.000411748	12	3	0.00041295	16	100	0.000432281
PEAKS046116	HSFA1B	8	0.000594693	16	1	0.00070608	12	60	0.000646567
PEAKS046117	HSFA1B	20	0.000641525	12	1	0.000680587	12	100	0.00063671
PEAKS042917	HSFA6A	16	0.000743748	16	3	0.000748665	8	100	0.000540044
PEAKS046121	HY5	16	0.00087651	20	1	0.000876651	12	60	0.000850239
PEAKS046122	HY5	20	0.000881287	20	1	0.000899758	12	100	0.000859845
PEAKS050107	IDD4	12	0.000640826	12	2	0.000618436	20	40	0.000389999
PEAKS042821	KAN1	8	0.00060814	8	1	0.000606013	12	100	0.000644429
PEAKS042981	LFY	16	0.000658646	20	1	0.000712905	20	60	0.000456221
PEAKS042832	LHY	12	0.000765085	8	2	0.000815426	20	60	0.000582027
PEAKS042922	MYB3	16	0.000713025	8	2	0.000772793	16	100	0.000661407
PEAKS042923	MYB3	12	0.000725944	16	2	0.00075805	12	80	0.000651379
PEAKS042914	MYB44	8	0.000677495	12	2	0.000706511	8	100	0.000663136
PEAKS042915	MYB44	20	0.000731029	16	1	0.000750555	20	100	0.000711004
PEAKS058394	MYC2	12	0.000771747	12	1	0.000793609	12	100	0.00063901
PEAKS042932	NAC032	16	0.000583133	12	2	0.000617376	12	80	0.000504944
PEAKS042933	NAC032	8	0.000717137	8	3	0.000735464	12	60	0.000696352
PEAKS042804	PIF1	20	0.000649265	8	2	0.000715733	20	100	0.000629537
PEAKS042805	PIF1	20	0.000792978	16	1	0.000837874	8	100	0.000738096
PEAKS042806	PIF1	16	0.000738808	16	1	0.000790395	16	60	0.000689938
PEAKS042779	PIF4	16	0.000673538	20	1	0.000708128	20	100	0.000656402
PEAKS042809	PIF4	16	0.00067488	8	1	0.000701504	12	100	0.000636149
PEAKS042873	PIF4	20	0.000887542	20	2	0.000903333	12	80	0.00080107
PEAKS042778	PIF5	20	0.000805168	8	1	0.000851527	20	100	0.000786138
PEAKS042874	PIF5	16	0.00082162	16	1	0.000870571	12	80	0.000791386
PEAKS042863	REF6	12	0.000960975	12	1	0.000933601	16	100	0.000880299
PEAKS042988	REF6	8	0.000955266	20	2	0.000949841	12	80	0.000917352
PEAKS042991	REF6	12	0.000947907	8	3	0.000954867	12	60	0.000899956
PEAKS042992	REF6	8	0.00091359	16	3	0.000936994	12	80	0.000820817
PEAKS047354	REF6	8	0.000924155	12	2	0.000942767	16	100	0.000876221
PEAKS047355	REF6	12	0.000848654	8	2	0.000828733	8	60	0.000844072
PEAKS047357	REF6	8	0.000540291	16	3	0.000588984	16	100	0.000570336
PEAKS042771	REV	8	0.000613852	12	1	0.000635808	12	80	0.000645947
PEAKS042815	SEP3	16	0.000710612	16	2	0.000731871	12	80	0.000592426
PEAKS042816	SEP3	12	0.000615643	16	3	0.00074853	20	80	0.000634911
PEAKS042820	SEP3	16	0.000572957	16	3	0.000665459	20	100	0.000498952
PEAKS042884	SOC1	16	0.00066854	20	2	0.000719221	16	100	0.00043921
PEAKS055375	TCP4	12	0.000663363	16	1	0.000672753	16	80	0.000650046
PEAKS055376	TCP4	20	0.000924182	12	1	0.000945773	20	80	0.000884092
PEAKS042876	TRB1	8	0.000829121	8	2	0.000880609	12	80	0.000739584
PEAKS042877	TRB1	8	0.000868442	12	2	0.0008639	12	100	0.000753674
PEAKS042949	WRKY18	8	0.000699939	12	2	0.000755861	20	80	0.000715992
PEAKS042950	WRKY18	16	0.000810473	8	2	0.000844213	8	60	0.000802223
PEAKS042955	WRKY18	12	0.000698267	8	2	0.000791751	12	100	0.000744945
PEAKS042956	WRKY18	12	0.000745881	8	3	0.000827853	12	100	0.00082397
PEAKS042868	WRKY33	12	0.000207784	12	3	0.000219247	16	60	0.000281954
PEAKS042869	WRKY33	12	0.000799128	16	1	0.000859818	20	80	0.000688978
PEAKS042947	WRKY33	8	0.000476038	16	2	0.000565834	20	60	0.000422156
PEAKS042948	WRKY33	12	0.000804034	20	1	0.000832015	8	100	0.000741719
PEAKS042953	WRKY33	12	0.000282868	8	2	0.000332404	12	100	0.000332775
PEAKS042954	WRKY33	8	0.000776205	16	1	0.000827002	12	60	0.000815915
PEAKS042951	WRKY40	8	0.00025629	8	3	0.000201014	8	80	0.000240776
PEAKS042952	WRKY40	8	0.000786737	8	2	0.000841676	8	100	0.000814436
PEAKS042957	WRKY40	12	0.00032	12	2	0.000299837	8	80	0.000325408
PEAKS042958	WRKY40	12	0.00074996	8	3	0.000825182	12	80	0.000817535
PEAKS058162	WUS	12	0.000582607	12	1	0.000670917	20	100	0.000668823
PEAKS058163	WUS	8	0.000484341	8	1	0.000510944	16	100	0.000456826
PEAKS042908	ZAT6	8	0.000824479	8	3	0.000859414	20	100	0.000651919
PEAKS042909	ZAT6	12	0.000841134	12	2	0.000863265	12	100	0.000657546

## Sheet: Supplementary Table S3
Supplementary Table S3. The number of pairs of motifs positions with the mutual information values exceding the threshold 0.05. We the dependencies logo DepLogo (Grau et al., 2019) for the motif models PWM, BaMM and SiteGA for the benchmark collection of 111 ChIP-seq datasets.
GTRD ID	TF	PWM	BaMM	SiteGA
PEAKS042938	ABF1	1	1	45
PEAKS042939	ABF1	0	1	41
PEAKS042900	ABF3	0	2	11
PEAKS042901	ABF3	0	1	27
PEAKS042902	ABF4	1	1	43
PEAKS042903	ABF4	0	1	12
PEAKS042822	AGL27	0	4	12
PEAKS042553	AGL8	0	4	1
PEAKS042554	AGL8	0	14	16
PEAKS042897	AGL8	0	2	9
PEAKS042817	AP1	0	7	14
PEAKS042818	AP1	0	2	7
PEAKS042819	AP1	0	1	13
PEAKS042765	AP2	0	3	12
PEAKS042831	ARF6	0	3	18
PEAKS046123	ARR1	1	5	22
PEAKS046124	ARR1	2	2	10
PEAKS046125	ARR1	0	0	9
PEAKS046126	ARR1	0	0	15
PEAKS046127	ARR1	0	2	7
PEAKS046128	ARR1	0	2	7
PEAKS046129	ARR10	0	2	10
PEAKS046130	ARR12	2	2	8
PEAKS046131	ARR12	0	2	15
PEAKS046132	ARR14	0	1	6
PEAKS042912	ATHB-5	0	0	8
PEAKS042913	ATHB-5	0	1	10
PEAKS042910	ATHB-6	0	2	13
PEAKS042911	ATHB-6	0	1	7
PEAKS042904	ATHB-7	2	1	10
PEAKS042905	ATHB-7	0	0	3
PEAKS042945	AZF1	32	46	26
PEAKS042833	BBM	0	0	21
PEAKS042834	BBM	1	2	8
PEAKS042924	BHLH122	0	6	7
PEAKS042925	BHLH122	0	1	14
PEAKS042946	BPC1	4	6	10
PEAKS042880	CCA1	0	8	16
PEAKS042881	CCA1	0	0	95
PEAKS042882	CCA1	0	1	13
PEAKS042920	DREB2A	0	5	13
PEAKS042921	DREB2A	0	1	14
PEAKS042826	ERF115	1	2	11
PEAKS042875	FHY3	2	3	10
PEAKS042928	GBF2	3	1	8
PEAKS042929	GBF2	3	3	39
PEAKS042936	GBF3	4	2	9
PEAKS042937	GBF3	3	5	32
PEAKS042926	HAT22	1	3	8
PEAKS042927	HAT22	1	0	19
PEAKS042890	HSFA1A	0	2	14
PEAKS042891	HSFA1A	1	3	15
PEAKS042892	HSFA1A	1	2	12
PEAKS046116	HSFA1B	3	2	10
PEAKS046117	HSFA1B	1	2	12
PEAKS042917	HSFA6A	0	0	9
PEAKS046121	HY5	1	1	6
PEAKS046122	HY5	0	0	8
PEAKS050107	IDD4	0	1	24
PEAKS042821	KAN1	2	3	11
PEAKS042981	LFY	0	1	14
PEAKS042832	LHY	0	0	11
PEAKS042922	MYB3	0	2	11
PEAKS042923	MYB3	0	2	8
PEAKS042914	MYB44	0	1	9
PEAKS042915	MYB44	0	1	16
PEAKS058394	MYC2	0	0	10
PEAKS042932	NAC032	0	5	9
PEAKS042933	NAC032	0	0	10
PEAKS042804	PIF1	0	0	14
PEAKS042805	PIF1	0	1	16
PEAKS042806	PIF1	0	1	21
PEAKS042779	PIF4	0	1	14
PEAKS042809	PIF4	0	0	19
PEAKS042873	PIF4	0	0	9
PEAKS042778	PIF5	0	0	5
PEAKS042874	PIF5	0	0	11
PEAKS042863	REF6	1	1	28
PEAKS042988	REF6	0	2	5
PEAKS042991	REF6	1	0	19
PEAKS042992	REF6	0	2	29
PEAKS047354	REF6	0	13	23
PEAKS047355	REF6	1	23	23
PEAKS047357	REF6	0	1	10
PEAKS042771	REV	0	3	8
PEAKS042815	2022-09-03	0	9	8
PEAKS042816	2022-09-03	0	4	13
PEAKS042820	2022-09-03	0	5	12
PEAKS042884	SOC1	0	3	15
PEAKS055375	TCP4	0	0	10
PEAKS055376	TCP4	1	1	4
PEAKS042876	TRB1	0	2	11
PEAKS042877	TRB1	1	3	22
PEAKS042949	WRKY18	0	1	15
PEAKS042950	WRKY18	0	1	4
PEAKS042955	WRKY18	0	1	6
PEAKS042956	WRKY18	0	2	7
PEAKS042868	WRKY33	2	20	10
PEAKS042869	WRKY33	0	3	13
PEAKS042947	WRKY33	2	8	18
PEAKS042948	WRKY33	0	17	10
PEAKS042953	WRKY33	0	1	10
PEAKS042954	WRKY33	1	2	8
PEAKS042951	WRKY40	0	5	14
PEAKS042952	WRKY40	0	0	2
PEAKS042957	WRKY40	0	2	10
PEAKS042958	WRKY40	0	2	6
PEAKS058162	WUS	0	1	19
PEAKS058163	WUS	0	1	16
PEAKS042908	ZAT6	1	1	16
PEAKS042909	ZAT6	0	1	7

## Sheet: Supplementary Table S4
Supplementary Table S4. The significantly enriched GO terms for the lists of genes respecting the CCA1 peaks, and BSs predicted within peaks by PWM, BaMM, and SiteGA models. The criterion p_adj < 0.05 was used for analysis. The column 'common GO terms' marks GO terms with the significance of enrichment (p_adj < 0.05) for PWM, BaMM and SiteGA motif models simultaneously.
Gene list	ID	Description	geneID	Count, observed	Total, observed	Count, expected	Total, expected	fold	pvalue	p_adj	qvalue	common GO terms
PWM	GO:0007623	circadian rhythm	AT1G04400/AT1G17455/AT1G18330/AT1G22770/AT1G27450/AT1G68050/AT2G16365/AT2G17840/AT2G21660/AT2G25930/AT2G40080/AT2G42540/AT2G46790/AT2G46830/AT3G04910/AT3G07650/AT3G15620/AT3G20810/AT3G26740/AT3G45780/AT3G46640/AT3G48360/AT3G63180/AT4G33980/AT5G08330/AT5G17300/AT5G24470/AT5G37260/AT5G42900/AT5G59560/AT5G59570/AT5G61380	32	1056	150	21869	4.41798	9.29683e-13	8.63676e-10	8.28397e-10	*
PWM	GO:0048511	rhythmic process	AT1G04400/AT1G17455/AT1G18330/AT1G22770/AT1G27450/AT1G68050/AT2G16365/AT2G17840/AT2G21660/AT2G25930/AT2G40080/AT2G42540/AT2G46790/AT2G46830/AT3G04910/AT3G07650/AT3G15620/AT3G20810/AT3G26740/AT3G45780/AT3G46640/AT3G48360/AT3G63180/AT4G33980/AT5G08330/AT5G17300/AT5G24470/AT5G37260/AT5G42900/AT5G59560/AT5G59570/AT5G61380	32	1056	150	21869	4.41798	9.29683e-13	8.63676e-10	8.28397e-10	*
PWM	GO:0009409	response to cold	AT1G10760/AT1G12610/AT1G13980/AT1G20450/AT1G20620/AT1G22770/AT1G29390/AT1G29395/AT1G55490/AT1G77120/AT2G15970/AT2G17840/AT2G20990/AT2G21060/AT2G21660/AT2G22840/AT2G25930/AT2G28900/AT2G36400/AT2G37220/AT2G37230/AT2G40140/AT2G42530/AT2G42540/AT2G45660/AT2G46590/AT2G46830/AT3G17020/AT3G22370/AT3G48360/AT3G53460/AT3G55580/AT3G61580/AT4G04020/AT4G04330/AT4G25470/AT4G25480/AT4G25490/AT4G29810/AT4G33980…	53	1056	400	21869	2.74398	2.61541e-11	1.61981e-08	1.55364e-08	*
PWM	GO:0009631	cold acclimation	AT1G10760/AT1G20450/AT1G29390/AT1G29395/AT2G15970/AT2G42530/AT2G42540/AT3G53460/AT3G55580/AT4G25470/AT4G25480/AT4G25490/AT4G29810/AT5G15960	14	1056	59	21869	4.91407	5.967e-07	0.000277167	0.000265846	*
PWM	GO:0042752	regulation of circadian rhythm	AT1G04400/AT1G17455/AT1G22770/AT2G40080/AT2G46830/AT3G15620/AT3G20810/AT3G46640/AT3G63180/AT4G33980/AT5G08330/AT5G42900/AT5G59560	13	1056	60	21869	4.48701	4.48728e-06	0.00166747	0.00159936
PWM	GO:0044247	cellular polysaccharide catabolic process	AT1G10760/AT3G01510/AT3G29320/AT3G46970/AT4G09020/AT5G55700/AT5G64860	7	1056	20	21869	7.24825	2.67217e-05	0.00827482	0.00793681	*
PWM	GO:0005977	glycogen metabolic process	AT1G27680/AT2G36390/AT2G39930/AT3G29320/AT3G46970/AT5G17310	6	1056	15	21869	8.28371	4.29349e-05	0.00839736	0.00805435	*
PWM	GO:0006112	energy reserve metabolic process	AT1G27680/AT2G36390/AT2G39930/AT3G29320/AT3G46970/AT5G17310	6	1056	15	21869	8.28371	4.29349e-05	0.00839736	0.00805435	*
PWM	GO:0071456	cellular response to hypoxia	AT1G07135/AT1G07400/AT1G13260/AT1G25550/AT1G25560/AT1G67360/AT1G68670/AT1G69890/AT1G74940/AT1G77120/AT2G15890/AT2G25735/AT2G40140/AT3G10020/AT3G56880/AT3G58670/AT3G60520/AT4G17230/AT4G27450/AT5G05410/AT5G13190/AT5G20250/AT5G42200/AT5G54470/AT5G54940/AT5G54960/AT5G58070	27	1056	242	21869	2.31054	4.70066e-05	0.00839736	0.00805435
PWM	GO:0071482	cellular response to light stimulus	AT1G04400/AT1G75100/AT2G25930/AT2G30170/AT2G40080/AT2G42540/AT2G46590/AT2G46790/AT3G44450/AT3G45780/AT3G56710/AT3G59060/AT3G62090/AT5G15960/AT5G43630/AT5G59560	16	1056	107	21869	3.09672	5.40016e-05	0.00839736	0.00805435
PWM	GO:0036294	cellular response to decreased oxygen levels	AT1G07135/AT1G07400/AT1G13260/AT1G25550/AT1G25560/AT1G67360/AT1G68670/AT1G69890/AT1G74940/AT1G77120/AT2G15890/AT2G25735/AT2G40140/AT3G10020/AT3G56880/AT3G58670/AT3G60520/AT4G17230/AT4G27450/AT5G05410/AT5G13190/AT5G20250/AT5G42200/AT5G54470/AT5G54940/AT5G54960/AT5G58070	27	1056	244	21869	2.2916	5.42349e-05	0.00839736	0.00805435
PWM	GO:0071453	cellular response to oxygen levels	AT1G07135/AT1G07400/AT1G13260/AT1G25550/AT1G25560/AT1G67360/AT1G68670/AT1G69890/AT1G74940/AT1G77120/AT2G15890/AT2G25735/AT2G40140/AT3G10020/AT3G56880/AT3G58670/AT3G60520/AT4G17230/AT4G27450/AT5G05410/AT5G13190/AT5G20250/AT5G42200/AT5G54470/AT5G54940/AT5G54960/AT5G58070	27	1056	244	21869	2.2916	5.42349e-05	0.00839736	0.00805435
PWM	GO:0009415	response to water	AT1G04400/AT1G12610/AT1G15690/AT1G20450/AT1G29395/AT1G67360/AT1G68820/AT1G77120/AT1G78380/AT2G05520/AT2G15970/AT2G16600/AT2G17840/AT2G21660/AT2G36270/AT2G41240/AT2G42540/AT2G46590/AT3G15500/AT3G29320/AT3G46620/AT3G46970/AT3G50500/AT3G56880/AT3G63060/AT4G04330/AT4G25480/AT4G25490/AT4G39090/AT5G01820/AT5G05410/AT5G08520/AT5G15960/AT5G15970/AT5G26340/AT5G50720/AT5G52300/AT5G58070/AT5G61590	39	1056	416	21869	1.94149	6.2797e-05	0.00897514	0.00860853
PWM	GO:0009414	response to water deprivation	AT1G04400/AT1G12610/AT1G15690/AT1G20450/AT1G29395/AT1G67360/AT1G68820/AT1G77120/AT1G78380/AT2G05520/AT2G15970/AT2G16600/AT2G17840/AT2G21660/AT2G36270/AT2G41240/AT2G42540/AT3G15500/AT3G29320/AT3G46620/AT3G46970/AT3G50500/AT3G56880/AT3G63060/AT4G04330/AT4G25480/AT4G25490/AT4G39090/AT5G01820/AT5G05410/AT5G08520/AT5G15960/AT5G15970/AT5G26340/AT5G50720/AT5G52300/AT5G58070/AT5G61590	38	1056	406	21869	1.93831	8.03242e-05	0.0106602	0.0102247
PWM	GO:0001666	response to hypoxia	AT1G07135/AT1G07400/AT1G13260/AT1G25550/AT1G25560/AT1G67360/AT1G68670/AT1G69890/AT1G74940/AT1G77120/AT2G15890/AT2G25735/AT2G40140/AT3G10020/AT3G56880/AT3G58670/AT3G60520/AT4G17230/AT4G27450/AT5G05410/AT5G13190/AT5G20250/AT5G25110/AT5G42200/AT5G54470/AT5G54940/AT5G54960/AT5G58070	28	1056	268	21869	2.16366	0.000109149	0.01352	0.0129677
PWM	GO:0071478	cellular response to radiation	AT1G04400/AT1G75100/AT2G25930/AT2G30170/AT2G40080/AT2G42540/AT2G46590/AT2G46790/AT3G44450/AT3G45780/AT3G56710/AT3G59060/AT3G62090/AT5G15960/AT5G43630/AT5G59560	16	1056	114	21869	2.90657	0.000117132	0.013602	0.0130464
PWM	GO:0036293	response to decreased oxygen levels	AT1G07135/AT1G07400/AT1G13260/AT1G25550/AT1G25560/AT1G67360/AT1G68670/AT1G69890/AT1G74940/AT1G77120/AT2G15890/AT2G25735/AT2G40140/AT3G10020/AT3G56880/AT3G58670/AT3G60520/AT4G17230/AT4G27450/AT5G05410/AT5G13190/AT5G20250/AT5G25110/AT5G42200/AT5G54470/AT5G54940/AT5G54960/AT5G58070	28	1056	272	21869	2.13184	0.000140587	0.0146306	0.014033
PWM	GO:0001101	response to acid chemical	AT1G04400/AT1G12610/AT1G15690/AT1G20450/AT1G29395/AT1G67360/AT1G68820/AT1G77120/AT1G78380/AT2G05520/AT2G15970/AT2G16600/AT2G17840/AT2G21660/AT2G36270/AT2G41240/AT2G42540/AT2G46590/AT3G15500/AT3G29320/AT3G46620/AT3G46970/AT3G50500/AT3G56880/AT3G63060/AT4G04330/AT4G25480/AT4G25490/AT4G39090/AT5G01820/AT5G05410/AT5G08520/AT5G15960/AT5G15970/AT5G26340/AT5G46050/AT5G50720/AT5G52300/AT5G58070/AT5G61590	40	1056	448	21869	1.84904	0.000146002	0.0146306	0.014033
PWM	GO:0070482	response to oxygen levels	AT1G07135/AT1G07400/AT1G13260/AT1G25550/AT1G25560/AT1G67360/AT1G68670/AT1G69890/AT1G74940/AT1G77120/AT2G15890/AT2G25735/AT2G40140/AT3G10020/AT3G56880/AT3G58670/AT3G60520/AT4G17230/AT4G27450/AT5G05410/AT5G13190/AT5G20250/AT5G25110/AT5G42200/AT5G54470/AT5G54940/AT5G54960/AT5G58070	28	1056	273	21869	2.12403	0.000149613	0.0146306	0.014033
PWM	GO:0015980	energy derivation by oxidation of organic compounds	AT1G04410/AT1G27680/AT1G77120/AT2G36390/AT2G39930/AT3G10020/AT3G15640/AT3G15840/AT3G22360/AT3G22370/AT3G27380/AT3G29320/AT3G46970/AT4G32470/AT5G08530/AT5G17310/AT5G23250/AT5G54950/AT5G67490	19	1056	157	21869	2.50622	0.000211216	0.0195869	0.0187868
PWM	GO:0005982	starch metabolic process	AT1G10760/AT1G15690/AT1G27680/AT2G36390/AT2G39930/AT3G01510/AT4G09020/AT4G28706/AT5G51820/AT5G51830/AT5G55700/AT5G64860	12	1056	75	21869	3.31349	0.000236529	0.0195869	0.0187868	*
PWM	GO:0071214	cellular response to abiotic stimulus	AT1G04400/AT1G19180/AT1G29395/AT1G75100/AT1G78380/AT2G15970/AT2G25930/AT2G30170/AT2G40080/AT2G42540/AT2G46590/AT2G46790/AT3G44450/AT3G45780/AT3G56710/AT3G59060/AT3G62090/AT5G15960/AT5G19770/AT5G43630/AT5G57630/AT5G59560	22	1056	198	21869	2.30103	0.000242464	0.0195869	0.0187868
PWM	GO:0104004	cellular response to environmental stimulus	AT1G04400/AT1G19180/AT1G29395/AT1G75100/AT1G78380/AT2G15970/AT2G25930/AT2G30170/AT2G40080/AT2G42540/AT2G46590/AT2G46790/AT3G44450/AT3G45780/AT3G56710/AT3G59060/AT3G62090/AT5G15960/AT5G19770/AT5G43630/AT5G57630/AT5G59560	22	1056	198	21869	2.30103	0.000242464	0.0195869	0.0187868
PWM	GO:0009251	glucan catabolic process	AT1G10760/AT3G01510/AT3G29320/AT3G46970/AT4G09020/AT5G55700/AT5G64860	7	1056	28	21869	5.17732	0.000290771	0.0224603	0.0215428
PWM	GO:0044275	cellular carbohydrate catabolic process	AT1G10760/AT1G22650/AT3G01510/AT3G29320/AT3G46970/AT3G55440/AT4G09020/AT5G55700/AT5G64860	9	1056	46	21869	4.05182	0.000302211	0.0224603	0.0215428	*
PWM	GO:0009637	response to blue light	AT1G04400/AT1G22770/AT1G68050/AT1G70800/AT1G75100/AT3G44450/AT3G45780/AT3G59060/AT4G18390/AT4G33980/AT5G39760/AT5G42900/AT5G43630	13	1056	90	21869	2.99134	0.000374092	0.0267332	0.0256412
PWM	GO:0030004	cellular monovalent inorganic cation homeostasis	AT2G28520/AT2G46560/AT3G05030/AT3G28710/AT3G28715/AT4G39080/AT5G25110/AT5G58070	8	1056	39	21869	4.24806	0.000465004	0.0319992	0.0306921
PWM	GO:0009890	negative regulation of biosynthetic process	AT1G06450/AT1G13260/AT1G22760/AT1G28420/AT1G55500/AT1G68050/AT1G75080/AT1G75380/AT2G18290/AT2G22540/AT2G36080/AT2G46790/AT2G46830/AT2G47400/AT2G47870/AT3G20800/AT3G29575/AT4G04450/AT4G24800/AT4G27310/AT4G33980/AT5G02160/AT5G04820/AT5G18600/AT5G24470/AT5G42900/AT5G44180/AT5G50360/AT5G61590/AT5G62430/AT5G63190	31	1056	341	21869	1.88266	0.00057731	0.0383087	0.0367438
PWM	GO:2000113	negative regulation of cellular macromolecule biosynthetic process	AT1G06450/AT1G13260/AT1G22760/AT1G28420/AT1G55500/AT1G68050/AT1G75080/AT1G75380/AT2G18290/AT2G22540/AT2G36080/AT2G46790/AT2G46830/AT2G47870/AT3G20800/AT3G29575/AT4G04450/AT4G24800/AT4G27310/AT4G33980/AT5G02160/AT5G04820/AT5G18600/AT5G24470/AT5G42900/AT5G44180/AT5G50360/AT5G62430/AT5G63190	29	1056	313	21869	1.91875	0.000632359	0.0394785	0.0378659
PWM	GO:0031324	negative regulation of cellular metabolic process	AT1G06450/AT1G13260/AT1G22760/AT1G28420/AT1G55500/AT1G68050/AT1G75080/AT1G75380/AT2G18290/AT2G22540/AT2G36080/AT2G46790/AT2G46830/AT2G47400/AT2G47870/AT3G15850/AT3G20800/AT3G29575/AT3G53460/AT3G57860/AT4G04020/AT4G04450/AT4G24800/AT4G27310/AT4G33980/AT4G39100/AT5G02160/AT5G04820/AT5G18600/AT5G24470/AT5G42900/AT5G43270/AT5G44180/AT5G50360/AT5G62430/AT5G63190/AT5G66570	37	1056	435	21869	1.76148	0.000641994	0.0394785	0.0378659
PWM	GO:0010228	vegetative to reproductive phase transition of meristem	AT1G04400/AT1G22770/AT1G25560/AT1G28420/AT1G69570/AT1G79000/AT2G01520/AT2G02760/AT2G21660/AT2G25930/AT2G40080/AT2G42200/AT2G46830/AT3G07650/AT3G12130/AT3G21060/AT3G63060/AT4G26000/AT4G33980/AT4G39100/AT5G42900/AT5G44180/AT5G62040/AT5G62430	24	1056	241	21869	2.06234	0.000658683	0.0394785	0.0378659
PWM	GO:0010558	negative regulation of macromolecule biosynthetic process	AT1G06450/AT1G13260/AT1G22760/AT1G28420/AT1G55500/AT1G68050/AT1G75080/AT1G75380/AT2G18290/AT2G22540/AT2G36080/AT2G46790/AT2G46830/AT2G47870/AT3G20800/AT3G29575/AT4G04450/AT4G24800/AT4G27310/AT4G33980/AT5G02160/AT5G04820/AT5G18600/AT5G24470/AT5G42900/AT5G44180/AT5G50360/AT5G62430/AT5G63190	29	1056	315	21869	1.90657	0.00070004	0.040646	0.0389858
PWM	GO:0006873	cellular ion homeostasis	AT1G04400/AT2G28520/AT2G41240/AT2G46560/AT3G05030/AT3G09390/AT3G28710/AT3G28715/AT3G56090/AT4G04770/AT4G27970/AT4G32060/AT4G39080/AT5G01490/AT5G23630/AT5G25110/AT5G58070/AT5G59030/AT5G59040	19	1056	175	21869	2.24844	0.00082996	0.0467293	0.0448205
PWM	GO:0051253	negative regulation of RNA metabolic process	AT1G13260/AT1G28420/AT1G75080/AT1G75380/AT2G22540/AT2G36080/AT2G46790/AT2G46830/AT2G47870/AT3G29575/AT3G53460/AT4G04450/AT4G24800/AT4G27310/AT4G33980/AT5G04820/AT5G18600/AT5G24470/AT5G42900/AT5G44180/AT5G50360/AT5G62430/AT5G63190	23	1056	232	21869	2.05308	0.000897706	0.048993	0.0469917
PWM	GO:0030003	cellular cation homeostasis	AT1G04400/AT2G28520/AT2G41240/AT2G46560/AT3G05030/AT3G09390/AT3G28710/AT3G28715/AT3G56090/AT4G04770/AT4G32060/AT4G39080/AT5G01490/AT5G23630/AT5G25110/AT5G58070/AT5G59030/AT5G59040	18	1056	163	21869	2.28691	0.000922903	0.048993	0.0469917
PWM	GO:0045892	negative regulation of transcription, DNA-templated	AT1G13260/AT1G28420/AT1G75080/AT1G75380/AT2G22540/AT2G36080/AT2G46790/AT2G46830/AT2G47870/AT3G29575/AT4G04450/AT4G24800/AT4G27310/AT4G33980/AT5G04820/AT5G18600/AT5G24470/AT5G42900/AT5G44180/AT5G50360/AT5G62430/AT5G63190	22	1056	219	21869	2.08038	0.000965702	0.0496602	0.0476317
PWM	GO:0005983	starch catabolic process	AT1G10760/AT3G01510/AT4G09020/AT5G55700/AT5G64860	5	1056	17	21869	6.09096	0.000988927	0.0496602	0.0476317
BaMM	GO:0007623	circadian rhythm	AT1G04400/AT1G17455/AT1G18330/AT1G22770/AT1G27450/AT1G68050/AT2G16365/AT2G17840/AT2G21660/AT2G25930/AT2G40080/AT2G42540/AT2G46790/AT2G46830/AT3G04910/AT3G07650/AT3G15620/AT3G20810/AT3G26740/AT3G46640/AT3G48360/AT3G63180/AT4G33980/AT5G02810/AT5G08330/AT5G17300/AT5G24470/AT5G37260/AT5G42900/AT5G59560/AT5G59570/AT5G61380	32	1046	150	21869	4.46022	7.20879e-13	6.69697e-10	6.40065e-10	*
BaMM	GO:0048511	rhythmic process	AT1G04400/AT1G17455/AT1G18330/AT1G22770/AT1G27450/AT1G68050/AT2G16365/AT2G17840/AT2G21660/AT2G25930/AT2G40080/AT2G42540/AT2G46790/AT2G46830/AT3G04910/AT3G07650/AT3G15620/AT3G20810/AT3G26740/AT3G46640/AT3G48360/AT3G63180/AT4G33980/AT5G02810/AT5G08330/AT5G17300/AT5G24470/AT5G37260/AT5G42900/AT5G59560/AT5G59570/AT5G61380	32	1046	150	21869	4.46022	7.20879e-13	6.69697e-10	6.40065e-10	*
BaMM	GO:0009409	response to cold	AT1G10760/AT1G12610/AT1G20620/AT1G22770/AT1G29390/AT1G29395/AT1G55490/AT1G77120/AT2G15970/AT2G17840/AT2G20990/AT2G21060/AT2G21660/AT2G22840/AT2G25930/AT2G28900/AT2G36400/AT2G37220/AT2G37230/AT2G40140/AT2G42530/AT2G42540/AT2G45660/AT2G46590/AT2G46830/AT3G17020/AT3G22370/AT3G27690/AT3G48360/AT3G53460/AT3G55580/AT3G61580/AT4G04020/AT4G04330/AT4G17090/AT4G25470/AT4G25480/AT4G25490/AT4G29810/AT4G33980…	54	1046	400	21869	2.82248	5.66685e-12	3.50967e-09	3.35438e-09	*
BaMM	GO:0009631	cold acclimation	AT1G10760/AT1G29390/AT1G29395/AT2G15970/AT2G42530/AT2G42540/AT3G53460/AT3G55580/AT4G25470/AT4G25480/AT4G25490/AT4G29810/AT5G15960/AT5G59820	14	1046	59	21869	4.96105	5.32343e-07	0.000247274	0.000236332	*
BaMM	GO:0042752	regulation of circadian rhythm	AT1G04400/AT1G17455/AT1G22770/AT2G40080/AT2G46830/AT3G15620/AT3G20810/AT3G46640/AT3G63180/AT4G33980/AT5G08330/AT5G42900/AT5G59560	13	1046	60	21869	4.52991	4.045e-06	0.00150312	0.00143661
BaMM	GO:0009415	response to water	AT1G04400/AT1G12610/AT1G15690/AT1G18390/AT1G29395/AT1G67360/AT1G68820/AT1G77120/AT1G78380/AT2G05520/AT2G15970/AT2G17840/AT2G21660/AT2G36270/AT2G41240/AT2G42540/AT2G46590/AT3G15500/AT3G27690/AT3G29320/AT3G45140/AT3G46620/AT3G46970/AT3G50500/AT3G56880/AT3G63060/AT4G04330/AT4G25480/AT4G25490/AT4G39090/AT5G01820/AT5G05410/AT5G08520/AT5G15960/AT5G15970/AT5G26340/AT5G50720/AT5G52300/AT5G58070/AT5G61590	40	1046	416	21869	2.01031	2.32636e-05	0.00667023	0.00637509
BaMM	GO:0044247	cellular polysaccharide catabolic process	AT1G10760/AT3G01510/AT3G29320/AT3G46970/AT4G09020/AT4G17090/AT5G55700	7	1046	20	21869	7.31754	2.513e-05	0.00667023	0.00637509	*
BaMM	GO:0009414	response to water deprivation	AT1G04400/AT1G12610/AT1G15690/AT1G18390/AT1G29395/AT1G67360/AT1G68820/AT1G77120/AT1G78380/AT2G05520/AT2G15970/AT2G17840/AT2G21660/AT2G36270/AT2G41240/AT2G42540/AT3G15500/AT3G27690/AT3G29320/AT3G45140/AT3G46620/AT3G46970/AT3G50500/AT3G56880/AT3G63060/AT4G04330/AT4G25480/AT4G25490/AT4G39090/AT5G01820/AT5G05410/AT5G08520/AT5G15960/AT5G15970/AT5G26340/AT5G50720/AT5G52300/AT5G58070/AT5G61590	39	1046	406	21869	2.00833	2.99547e-05	0.00695698	0.00664916
BaMM	GO:0009251	glucan catabolic process	AT1G10760/AT3G01510/AT3G29320/AT3G46970/AT4G09020/AT4G17090/AT5G20950/AT5G55700	8	1046	28	21869	5.97351	3.51889e-05	0.00714618	0.00682999
BaMM	GO:0071456	cellular response to hypoxia	AT1G07135/AT1G07400/AT1G13260/AT1G25550/AT1G25560/AT1G67360/AT1G68670/AT1G69890/AT1G77120/AT2G15890/AT2G25735/AT2G36800/AT2G40140/AT3G10020/AT3G56880/AT3G58670/AT3G60520/AT4G17230/AT4G27450/AT5G05410/AT5G20250/AT5G42200/AT5G54470/AT5G54940/AT5G54960/AT5G58070/AT5G59820	27	1046	242	21869	2.33263	3.99673e-05	0.00714618	0.00682999
BaMM	GO:0036294	cellular response to decreased oxygen levels	AT1G07135/AT1G07400/AT1G13260/AT1G25550/AT1G25560/AT1G67360/AT1G68670/AT1G69890/AT1G77120/AT2G15890/AT2G25735/AT2G36800/AT2G40140/AT3G10020/AT3G56880/AT3G58670/AT3G60520/AT4G17230/AT4G27450/AT5G05410/AT5G20250/AT5G42200/AT5G54470/AT5G54940/AT5G54960/AT5G58070/AT5G59820	27	1046	244	21869	2.31351	4.6154e-05	0.00714618	0.00682999
BaMM	GO:0071453	cellular response to oxygen levels	AT1G07135/AT1G07400/AT1G13260/AT1G25550/AT1G25560/AT1G67360/AT1G68670/AT1G69890/AT1G77120/AT2G15890/AT2G25735/AT2G36800/AT2G40140/AT3G10020/AT3G56880/AT3G58670/AT3G60520/AT4G17230/AT4G27450/AT5G05410/AT5G20250/AT5G42200/AT5G54470/AT5G54940/AT5G54960/AT5G58070/AT5G59820	27	1046	244	21869	2.31351	4.6154e-05	0.00714618	0.00682999
BaMM	GO:0001101	response to acid chemical	AT1G04400/AT1G12610/AT1G15690/AT1G18390/AT1G29395/AT1G67360/AT1G68820/AT1G77120/AT1G78380/AT2G05520/AT2G15970/AT2G17840/AT2G21660/AT2G36270/AT2G41240/AT2G42540/AT2G46590/AT3G15500/AT3G27690/AT3G29320/AT3G45140/AT3G46620/AT3G46970/AT3G50500/AT3G56880/AT3G63060/AT4G04330/AT4G25480/AT4G25490/AT4G39090/AT5G01820/AT5G05410/AT5G08520/AT5G15960/AT5G15970/AT5G26340/AT5G46050/AT5G50720/AT5G52300/AT5G58070…	41	1046	448	21869	1.91339	5.73048e-05	0.00819018	0.00782779
BaMM	GO:0055065	metal ion homeostasis	AT1G04400/AT1G22990/AT1G66590/AT2G41240/AT3G05030/AT3G08040/AT3G09390/AT3G56090/AT4G04770/AT4G14230/AT4G14240/AT4G32060/AT4G33460/AT4G33700/AT4G36820/AT4G39080/AT5G01490/AT5G23630/AT5G25110/AT5G51720/AT5G58070/AT5G59030/AT5G59040	23	1046	199	21869	2.41642	8.48325e-05	0.0102544	0.00980069
BaMM	GO:0055080	cation homeostasis	AT1G04400/AT1G22990/AT1G66590/AT2G28520/AT2G41240/AT2G46560/AT3G05030/AT3G08040/AT3G09390/AT3G28710/AT3G28715/AT3G56090/AT4G04770/AT4G14230/AT4G14240/AT4G32060/AT4G33460/AT4G33700/AT4G36820/AT4G39080/AT5G01490/AT5G23630/AT5G25110/AT5G51720/AT5G58070/AT5G59030/AT5G59040	27	1046	253	21869	2.23121	8.6074e-05	0.0102544	0.00980069
BaMM	GO:0001666	response to hypoxia	AT1G07135/AT1G07400/AT1G13260/AT1G25550/AT1G25560/AT1G67360/AT1G68670/AT1G69890/AT1G77120/AT2G15890/AT2G25735/AT2G36800/AT2G40140/AT3G10020/AT3G56880/AT3G58670/AT3G60520/AT4G17230/AT4G27450/AT5G05410/AT5G20250/AT5G25110/AT5G42200/AT5G54470/AT5G54940/AT5G54960/AT5G58070/AT5G59820	28	1046	268	21869	2.18434	9.29565e-05	0.0102544	0.00980069
BaMM	GO:0098771	inorganic ion homeostasis	AT1G04400/AT1G22990/AT1G66590/AT1G68670/AT2G28520/AT2G41240/AT2G46560/AT3G05030/AT3G08040/AT3G09390/AT3G28710/AT3G28715/AT3G56090/AT4G04770/AT4G14230/AT4G14240/AT4G32060/AT4G33460/AT4G33700/AT4G36820/AT4G39080/AT5G01490/AT5G23630/AT5G25110/AT5G51720/AT5G58070/AT5G59030/AT5G59040	28	1046	269	21869	2.17622	9.91354e-05	0.0102544	0.00980069
BaMM	GO:0006873	cellular ion homeostasis	AT1G04400/AT2G28520/AT2G41240/AT2G46560/AT3G05030/AT3G08040/AT3G09390/AT3G28710/AT3G28715/AT3G56090/AT4G04770/AT4G27970/AT4G32060/AT4G36820/AT4G39080/AT5G01490/AT5G23630/AT5G25110/AT5G58070/AT5G59030/AT5G59040	21	1046	175	21869	2.50887	9.93431e-05	0.0102544	0.00980069
BaMM	GO:0030003	cellular cation homeostasis	AT1G04400/AT2G28520/AT2G41240/AT2G46560/AT3G05030/AT3G08040/AT3G09390/AT3G28710/AT3G28715/AT3G56090/AT4G04770/AT4G32060/AT4G36820/AT4G39080/AT5G01490/AT5G23630/AT5G25110/AT5G58070/AT5G59030/AT5G59040	20	1046	163	21869	2.56531	0.000105929	0.0103587	0.00990036
BaMM	GO:0036293	response to decreased oxygen levels	AT1G07135/AT1G07400/AT1G13260/AT1G25550/AT1G25560/AT1G67360/AT1G68670/AT1G69890/AT1G77120/AT2G15890/AT2G25735/AT2G36800/AT2G40140/AT3G10020/AT3G56880/AT3G58670/AT3G60520/AT4G17230/AT4G27450/AT5G05410/AT5G20250/AT5G25110/AT5G42200/AT5G54470/AT5G54940/AT5G54960/AT5G58070/AT5G59820	28	1046	272	21869	2.15222	0.000119942	0.0111426	0.0106496
BaMM	GO:0070482	response to oxygen levels	AT1G07135/AT1G07400/AT1G13260/AT1G25550/AT1G25560/AT1G67360/AT1G68670/AT1G69890/AT1G77120/AT2G15890/AT2G25735/AT2G36800/AT2G40140/AT3G10020/AT3G56880/AT3G58670/AT3G60520/AT4G17230/AT4G27450/AT5G05410/AT5G20250/AT5G25110/AT5G42200/AT5G54470/AT5G54940/AT5G54960/AT5G58070/AT5G59820	28	1046	273	21869	2.14433	0.000127699	0.0112983	0.0107984
BaMM	GO:0071482	cellular response to light stimulus	AT1G04400/AT1G75100/AT2G25930/AT2G30170/AT2G40080/AT2G42540/AT2G46590/AT2G46790/AT3G44450/AT3G56710/AT3G62090/AT5G02810/AT5G15960/AT5G43630/AT5G59560	15	1046	107	21869	2.93092	0.00017304	0.014614	0.0139674
BaMM	GO:0050801	ion homeostasis	AT1G04400/AT1G22990/AT1G66590/AT1G68670/AT2G28520/AT2G41240/AT2G46560/AT3G05030/AT3G08040/AT3G09390/AT3G28710/AT3G28715/AT3G56090/AT4G04770/AT4G14230/AT4G14240/AT4G27970/AT4G32060/AT4G33460/AT4G33700/AT4G36820/AT4G39080/AT5G01490/AT5G23630/AT5G25110/AT5G51720/AT5G58070/AT5G59030/AT5G59040	29	1046	293	21869	2.06932	0.000181226	0.0146399	0.0139921
BaMM	GO:0071214	cellular response to abiotic stimulus	AT1G04400/AT1G18390/AT1G19180/AT1G29395/AT1G75100/AT1G78380/AT2G15970/AT2G25930/AT2G30170/AT2G40080/AT2G42540/AT2G46590/AT2G46790/AT3G44450/AT3G56710/AT3G62090/AT5G02810/AT5G15960/AT5G19770/AT5G43630/AT5G57630/AT5G59560	22	1046	198	21869	2.32303	0.000212407	0.0157861	0.0150876
BaMM	GO:0104004	cellular response to environmental stimulus	AT1G04400/AT1G18390/AT1G19180/AT1G29395/AT1G75100/AT1G78380/AT2G15970/AT2G25930/AT2G30170/AT2G40080/AT2G42540/AT2G46590/AT2G46790/AT3G44450/AT3G56710/AT3G62090/AT5G02810/AT5G15960/AT5G19770/AT5G43630/AT5G57630/AT5G59560	22	1046	198	21869	2.32303	0.000212407	0.0157861	0.0150876
BaMM	GO:0031324	negative regulation of cellular metabolic process	AT1G06450/AT1G13260/AT1G22760/AT1G55500/AT1G68050/AT1G75080/AT1G75380/AT1G75950/AT2G18290/AT2G22540/AT2G36080/AT2G46790/AT2G46830/AT2G47870/AT3G15850/AT3G20800/AT3G29575/AT3G50630/AT3G53460/AT3G57860/AT4G04020/AT4G04450/AT4G24800/AT4G27310/AT4G33980/AT4G39100/AT5G02160/AT5G02810/AT5G04820/AT5G13180/AT5G18600/AT5G24470/AT5G42900/AT5G43270/AT5G50360/AT5G62430/AT5G63190/AT5G66570	38	1046	435	21869	1.82638	0.000271243	0.0193835	0.0185258
BaMM	GO:0044275	cellular carbohydrate catabolic process	AT1G10760/AT1G22650/AT3G01510/AT3G29320/AT3G46970/AT3G55440/AT4G09020/AT4G17090/AT5G55700	9	1046	46	21869	4.09055	0.000281684	0.019384	0.0185264	*
BaMM	GO:0009639	response to red or far red light	AT1G18400/AT1G22770/AT1G78600/AT2G16365/AT2G25930/AT2G30380/AT2G31360/AT2G40080/AT2G42540/AT2G46590/AT2G46790/AT3G27690/AT3G62090/AT4G04770/AT4G18390/AT4G27310/AT4G33980/AT5G02810/AT5G03220/AT5G08130/AT5G15960/AT5G24470/AT5G42900/AT5G59560	24	1046	231	21869	2.17218	0.000310788	0.0201169	0.0192268
BaMM	GO:0048580	regulation of post-embryonic development	AT1G04400/AT1G07430/AT1G13260/AT1G22770/AT1G60190/AT1G68050/AT1G69570/AT1G77110/AT1G78600/AT2G16365/AT2G18040/AT2G22540/AT2G22840/AT2G25930/AT2G36270/AT2G36400/AT2G40080/AT2G45660/AT2G46590/AT3G07650/AT3G27785/AT3G47620/AT3G50500/AT3G63060/AT4G18390/AT4G26000/AT4G27310/AT4G28190/AT4G29830/AT5G37260/AT5G57660/AT5G59570/AT5G59990	33	1046	362	21869	1.90591	0.000313988	0.0201169	0.0192268
BaMM	GO:0071478	cellular response to radiation	AT1G04400/AT1G75100/AT2G25930/AT2G30170/AT2G40080/AT2G42540/AT2G46590/AT2G46790/AT3G44450/AT3G56710/AT3G62090/AT5G02810/AT5G15960/AT5G43630/AT5G59560	15	1046	114	21869	2.75096	0.000350518	0.0217087	0.0207482
BaMM	GO:0030004	cellular monovalent inorganic cation homeostasis	AT2G28520/AT2G46560/AT3G05030/AT3G28710/AT3G28715/AT4G39080/AT5G25110/AT5G58070	8	1046	39	21869	4.28867	0.000436414	0.0261567	0.0249993
BaMM	GO:0005977	glycogen metabolic process	AT2G36390/AT2G39930/AT3G29320/AT3G46970/AT5G17310	5	1046	15	21869	6.96909	0.000497996	0.0280387	0.0267981	*
BaMM	GO:0006112	energy reserve metabolic process	AT2G36390/AT2G39930/AT3G29320/AT3G46970/AT5G17310	5	1046	15	21869	6.96909	0.000497996	0.0280387	0.0267981	*
BaMM	GO:0015980	energy derivation by oxidation of organic compounds	AT1G04410/AT1G77120/AT2G36390/AT2G39930/AT3G10020/AT3G15640/AT3G15840/AT3G22360/AT3G22370/AT3G27380/AT3G29320/AT3G46970/AT4G32470/AT5G08530/AT5G17310/AT5G23250/AT5G54950/AT5G67490	18	1046	157	21869	2.39701	0.000530203	0.0288761	0.0275984
BaMM	GO:2000113	negative regulation of cellular macromolecule biosynthetic process	AT1G06450/AT1G13260/AT1G22760/AT1G55500/AT1G68050/AT1G75080/AT1G75380/AT2G18290/AT2G22540/AT2G36080/AT2G46790/AT2G46830/AT2G47870/AT3G20800/AT3G29575/AT4G04450/AT4G24800/AT4G27310/AT4G33980/AT5G02160/AT5G02810/AT5G04820/AT5G13180/AT5G18600/AT5G24470/AT5G42900/AT5G50360/AT5G62430/AT5G63190	29	1046	313	21869	1.9371	0.000543952	0.0288761	0.0275984
BaMM	GO:0010558	negative regulation of macromolecule biosynthetic process	AT1G06450/AT1G13260/AT1G22760/AT1G55500/AT1G68050/AT1G75080/AT1G75380/AT2G18290/AT2G22540/AT2G36080/AT2G46790/AT2G46830/AT2G47870/AT3G20800/AT3G29575/AT4G04450/AT4G24800/AT4G27310/AT4G33980/AT5G02160/AT5G02810/AT5G04820/AT5G13180/AT5G18600/AT5G24470/AT5G42900/AT5G50360/AT5G62430/AT5G63190	29	1046	315	21869	1.9248	0.000602698	0.0308431	0.0294784
BaMM	GO:2000026	regulation of multicellular organismal development	AT1G04400/AT1G07430/AT1G13260/AT1G22770/AT1G60190/AT1G68050/AT1G69570/AT1G77110/AT1G78600/AT2G16365/AT2G18040/AT2G22540/AT2G22840/AT2G25930/AT2G36270/AT2G36400/AT2G40080/AT2G45660/AT2G46590/AT3G07650/AT3G27785/AT3G47620/AT3G50500/AT3G63060/AT4G18390/AT4G26000/AT4G27310/AT4G28190/AT4G29830/AT5G37260/AT5G57660/AT5G59570/AT5G59990	33	1046	376	21869	1.83495	0.000614207	0.0308431	0.0294784
BaMM	GO:0042592	homeostatic process	AT1G04400/AT1G22990/AT1G44800/AT1G60800/AT1G65950/AT1G66590/AT1G68670/AT1G77110/AT2G28520/AT2G40090/AT2G41240/AT2G46560/AT3G05030/AT3G08040/AT3G09390/AT3G27690/AT3G27785/AT3G28710/AT3G28715/AT3G56090/AT4G04770/AT4G14230/AT4G14240/AT4G27970/AT4G32060/AT4G33460/AT4G33700/AT4G36820/AT4G37390/AT4G39080/AT5G01490/AT5G06690/AT5G10860/AT5G23630/AT5G25110/AT5G51720/AT5G54290/AT5G58070/AT5G59030/AT5G59040	40	1046	490	21869	1.70672	0.000736413	0.0358244	0.0342393
BaMM	GO:0055082	cellular chemical homeostasis	AT1G04400/AT2G28520/AT2G41240/AT2G46560/AT3G05030/AT3G08040/AT3G09390/AT3G28710/AT3G28715/AT3G56090/AT4G04770/AT4G27970/AT4G32060/AT4G36820/AT4G39080/AT5G01490/AT5G23630/AT5G25110/AT5G58070/AT5G59030/AT5G59040	21	1046	203	21869	2.16282	0.000759451	0.0358244	0.0342393
BaMM	GO:0051253	negative regulation of RNA metabolic process	AT1G13260/AT1G75080/AT1G75380/AT2G22540/AT2G36080/AT2G46790/AT2G46830/AT2G47870/AT3G29575/AT3G53460/AT4G04450/AT4G24800/AT4G27310/AT4G33980/AT5G02810/AT5G04820/AT5G13180/AT5G18600/AT5G24470/AT5G42900/AT5G50360/AT5G62430/AT5G63190	23	1046	232	21869	2.0727	0.000790356	0.0358244	0.0342393
BaMM	GO:0009648	photoperiodism	AT1G04400/AT1G17455/AT1G18390/AT1G22770/AT1G25560/AT1G69570/AT1G79000/AT2G25930/AT2G40080/AT2G46830/AT3G07650/AT3G12130/AT3G15620/AT4G26000/AT4G33980/AT4G39100/AT5G42900	17	1046	149	21869	2.38539	0.000790529	0.0358244	0.0342393
BaMM	GO:0005982	starch metabolic process	AT1G10760/AT1G15690/AT2G36390/AT2G39930/AT3G01510/AT4G09020/AT4G17090/AT4G28706/AT5G51820/AT5G51830/AT5G55700	11	1046	75	21869	3.0664	0.000839955	0.0368885	0.0352563	*
BaMM	GO:0045892	negative regulation of transcription, DNA-templated	AT1G13260/AT1G75080/AT1G75380/AT2G22540/AT2G36080/AT2G46790/AT2G46830/AT2G47870/AT3G29575/AT4G04450/AT4G24800/AT4G27310/AT4G33980/AT5G02810/AT5G04820/AT5G13180/AT5G18600/AT5G24470/AT5G42900/AT5G50360/AT5G62430/AT5G63190	22	1046	219	21869	2.10027	0.000853717	0.0368885	0.0352563
BaMM	GO:0005983	starch catabolic process	AT1G10760/AT3G01510/AT4G09020/AT4G17090/AT5G55700	5	1046	17	21869	6.1492	0.000947335	0.0381747	0.0364856
BaMM	GO:1902679	negative regulation of RNA biosynthetic process	AT1G13260/AT1G75080/AT1G75380/AT2G22540/AT2G36080/AT2G46790/AT2G46830/AT2G47870/AT3G29575/AT4G04450/AT4G24800/AT4G27310/AT4G33980/AT5G02810/AT5G04820/AT5G13180/AT5G18600/AT5G24470/AT5G42900/AT5G50360/AT5G62430/AT5G63190	22	1046	221	21869	2.08127	0.000962766	0.0381747	0.0364856
BaMM	GO:1903507	negative regulation of nucleic acid-templated transcription	AT1G13260/AT1G75080/AT1G75380/AT2G22540/AT2G36080/AT2G46790/AT2G46830/AT2G47870/AT3G29575/AT4G04450/AT4G24800/AT4G27310/AT4G33980/AT5G02810/AT5G04820/AT5G13180/AT5G18600/AT5G24470/AT5G42900/AT5G50360/AT5G62430/AT5G63190	22	1046	221	21869	2.08127	0.000962766	0.0381747	0.0364856
BaMM	GO:0010017	red or far-red light signaling pathway	AT2G25930/AT2G40080/AT2G42540/AT2G46590/AT2G46790/AT3G62090/AT5G02810/AT5G15960/AT5G59560	9	1046	54	21869	3.48454	0.000965667	0.0381747	0.0364856
BaMM	GO:0048878	chemical homeostasis	AT1G04400/AT1G22990/AT1G44800/AT1G65950/AT1G66590/AT1G68670/AT1G77110/AT2G28520/AT2G40090/AT2G41240/AT2G46560/AT3G05030/AT3G08040/AT3G09390/AT3G27690/AT3G27785/AT3G28710/AT3G28715/AT3G56090/AT4G04770/AT4G14230/AT4G14240/AT4G27970/AT4G32060/AT4G33460/AT4G33700/AT4G36820/AT4G37390/AT4G39080/AT5G01490/AT5G23630/AT5G25110/AT5G51720/AT5G58070/AT5G59030/AT5G59040	36	1046	434	21869	1.73424	0.000998942	0.0386674	0.0369565
BaMM	GO:0009890	negative regulation of biosynthetic process	AT1G06450/AT1G13260/AT1G22760/AT1G55500/AT1G68050/AT1G75080/AT1G75380/AT2G18290/AT2G22540/AT2G36080/AT2G46790/AT2G46830/AT2G47870/AT3G20800/AT3G29575/AT4G04450/AT4G24800/AT4G27310/AT4G33980/AT5G02160/AT5G02810/AT5G04820/AT5G13180/AT5G18600/AT5G24470/AT5G42900/AT5G50360/AT5G61590/AT5G62430/AT5G63190	30	1046	341	21869	1.83935	0.00102265	0.0387773	0.0370616
BaMM	GO:0010109	regulation of photosynthesis	AT1G01790/AT2G45870/AT3G15850/AT4G04020/AT4G27800/AT4G33470/AT5G52520/AT5G66570	8	1046	45	21869	3.71685	0.00118651	0.0438692	0.0419281
BaMM	GO:0019725	cellular homeostasis	AT1G04400/AT2G28520/AT2G41240/AT2G46560/AT3G05030/AT3G08040/AT3G09390/AT3G28710/AT3G28715/AT3G56090/AT4G04770/AT4G27970/AT4G32060/AT4G36820/AT4G39080/AT5G01490/AT5G06690/AT5G10860/AT5G23630/AT5G25110/AT5G54290/AT5G58070/AT5G59030/AT5G59040	24	1046	254	21869	1.97549	0.00120416	0.0438692	0.0419281
BaMM	GO:0071489	cellular response to red or far red light	AT2G25930/AT2G40080/AT2G42540/AT2G46590/AT2G46790/AT3G62090/AT5G02810/AT5G15960/AT5G59560	9	1046	56	21869	3.3601	0.00126322	0.0451358	0.0431387
BaMM	GO:0010228	vegetative to reproductive phase transition of meristem	AT1G04400/AT1G18390/AT1G22770/AT1G25560/AT1G69570/AT1G79000/AT2G02760/AT2G21660/AT2G25930/AT2G40080/AT2G42200/AT2G46830/AT3G07650/AT3G12130/AT3G21060/AT3G27785/AT3G63060/AT4G26000/AT4G33980/AT4G39100/AT5G42900/AT5G62040/AT5G62430	23	1046	241	21869	1.9953	0.00132054	0.0462937	0.0442454
SiteGA	GO:0007623	circadian rhythm	AT1G18330/AT1G68050/AT2G16365/AT2G40080/AT2G42540/AT3G07650/AT3G48100/AT3G63180/AT4G33980/AT5G17300/AT5G24470/AT5G42900/AT5G61380	13	341	150	21869	5.5581	6.89664e-07	0.000375867	0.000358988	*
SiteGA	GO:0048511	rhythmic process	AT1G18330/AT1G68050/AT2G16365/AT2G40080/AT2G42540/AT3G07650/AT3G48100/AT3G63180/AT4G33980/AT5G17300/AT5G24470/AT5G42900/AT5G61380	13	341	150	21869	5.5581	6.89664e-07	0.000375867	0.000358988	*
SiteGA	GO:0009409	response to cold	AT1G10760/AT1G55490/AT2G28900/AT2G36400/AT2G42530/AT2G42540/AT2G45660/AT3G55580/AT3G61580/AT4G25470/AT4G25490/AT4G33980/AT4G39260/AT5G01820/AT5G13330/AT5G42900/AT5G50720/AT5G52300	18	341	400	21869	2.88594	6.33896e-05	0.0138343	0.013213	*
SiteGA	GO:0005977	glycogen metabolic process	AT1G27680/AT2G36390/AT3G46970/AT5G17310	4	341	15	21869	17.1019	6.92087e-05	0.0138343	0.013213	*
SiteGA	GO:0006112	energy reserve metabolic process	AT1G27680/AT2G36390/AT3G46970/AT5G17310	4	341	15	21869	17.1019	6.92087e-05	0.0138343	0.013213	*
SiteGA	GO:0044275	cellular carbohydrate catabolic process	AT1G10760/AT1G22650/AT3G01510/AT3G46970/AT3G55440/AT5G55700	6	341	46	21869	8.36504	7.61519e-05	0.0138343	0.013213	*
SiteGA	GO:0005982	starch metabolic process	AT1G10760/AT1G15690/AT1G27680/AT2G36390/AT3G01510/AT4G28706/AT5G55700	7	341	75	21869	5.98565	0.000168563	0.0262477	0.025069	*
SiteGA	GO:0044247	cellular polysaccharide catabolic process	AT1G10760/AT3G01510/AT3G46970/AT5G55700	4	341	20	21869	12.8264	0.000230969	0.0314695	0.0300563	*
SiteGA	GO:0009639	response to red or far red light	AT1G78600/AT2G16365/AT2G31360/AT2G40080/AT2G42540/AT2G42870/AT3G48100/AT3G59060/AT4G33980/AT5G24470/AT5G39860/AT5G42900	12	341	231	21869	3.33153	0.000292025	0.0336915	0.0321785
SiteGA	GO:0009631	cold acclimation	AT1G10760/AT2G42530/AT2G42540/AT3G55580/AT4G25470/AT4G25490	6	341	59	21869	6.52189	0.000309096	0.0336915	0.0321785	*
Peaks	GO:0007623	circadian rhythm	AT1G04400/AT1G09340/AT1G17455/AT1G18330/AT1G22770/AT1G27450/AT1G68050/AT2G16365/AT2G17840/AT2G21660/AT2G25930/AT2G40080/AT2G42540/AT2G46790/AT2G46830/AT2G47700/AT3G04910/AT3G06080/AT3G07650/AT3G15620/AT3G20810/AT3G26740/AT3G45780/AT3G46640/AT3G48100/AT3G48360/AT3G61070/AT3G63180/AT4G00540/AT4G33980/AT5G02810/AT5G08330/AT5G17300/AT5G24470/AT5G28770/AT5G37260/AT5G42900/AT5G59560/AT5G59570/AT5G61380	40	1527	150	21869	3.81908	8.16244e-14	8.44812e-11	8.00348e-11	*
Peaks	GO:0048511	rhythmic process	AT1G04400/AT1G09340/AT1G17455/AT1G18330/AT1G22770/AT1G27450/AT1G68050/AT2G16365/AT2G17840/AT2G21660/AT2G25930/AT2G40080/AT2G42540/AT2G46790/AT2G46830/AT2G47700/AT3G04910/AT3G06080/AT3G07650/AT3G15620/AT3G20810/AT3G26740/AT3G45780/AT3G46640/AT3G48100/AT3G48360/AT3G61070/AT3G63180/AT4G00540/AT4G33980/AT5G02810/AT5G08330/AT5G17300/AT5G24470/AT5G28770/AT5G37260/AT5G42900/AT5G59560/AT5G59570/AT5G61380	40	1527	150	21869	3.81908	8.16244e-14	8.44812e-11	8.00348e-11	*
Peaks	GO:0009409	response to cold	AT1G09340/AT1G09350/AT1G10760/AT1G12610/AT1G13980/AT1G20450/AT1G20620/AT1G22770/AT1G29390/AT1G29395/AT1G55490/AT1G77120/AT2G01918/AT2G05100/AT2G15970/AT2G17840/AT2G20990/AT2G21060/AT2G21660/AT2G22840/AT2G25930/AT2G28900/AT2G36400/AT2G37220/AT2G37230/AT2G40140/AT2G42530/AT2G42540/AT2G45660/AT2G46590/AT2G46810/AT2G46830/AT2G47730/AT3G17020/AT3G22370/AT3G22840/AT3G27690/AT3G47470/AT3G48360/AT3G53460…	67	1527	400	21869	2.39886	1.86314e-11	1.28556e-08	1.2179e-08	*
Peaks	GO:0009639	response to red or far red light	AT1G02340/AT1G18400/AT1G22280/AT1G22770/AT1G78600/AT2G05100/AT2G16365/AT2G20180/AT2G25930/AT2G29090/AT2G30380/AT2G31360/AT2G40080/AT2G42540/AT2G42870/AT2G46260/AT2G46590/AT2G46790/AT2G47700/AT3G21150/AT3G22840/AT3G27690/AT3G48100/AT3G59060/AT3G62090/AT4G04770/AT4G18390/AT4G27310/AT4G33980/AT4G37470/AT4G39070/AT5G02810/AT5G03220/AT5G08130/AT5G15960/AT5G24470/AT5G39860/AT5G42900/AT5G59560/AT5G61270	40	1527	231	21869	2.47992	8.46763e-08	4.382e-05	4.15136e-05
Peaks	GO:0071482	cellular response to light stimulus	AT1G02340/AT1G04400/AT1G22280/AT1G75100/AT2G20180/AT2G25930/AT2G30170/AT2G40080/AT2G42540/AT2G46590/AT2G46790/AT2G47700/AT3G21150/AT3G22840/AT3G44450/AT3G45780/AT3G52740/AT3G56710/AT3G59060/AT3G62090/AT5G02810/AT5G15960/AT5G43630/AT5G59560	24	1527	107	21869	3.21231	2.68362e-07	0.000111102	0.000105254
Peaks	GO:0071489	cellular response to red or far red light	AT1G02340/AT1G22280/AT2G20180/AT2G25930/AT2G40080/AT2G42540/AT2G46590/AT2G46790/AT2G47700/AT3G21150/AT3G22840/AT3G59060/AT3G62090/AT5G02810/AT5G15960/AT5G59560	16	1527	56	21869	4.09187	8.47592e-07	0.000272053	0.000257735
Peaks	GO:0071478	cellular response to radiation	AT1G02340/AT1G04400/AT1G22280/AT1G75100/AT2G20180/AT2G25930/AT2G30170/AT2G40080/AT2G42540/AT2G46590/AT2G46790/AT2G47700/AT3G21150/AT3G22840/AT3G44450/AT3G45780/AT3G52740/AT3G56710/AT3G59060/AT3G62090/AT5G02810/AT5G15960/AT5G43630/AT5G59560	24	1527	114	21869	3.01506	9.19988e-07	0.000272053	0.000257735
Peaks	GO:0009631	cold acclimation	AT1G10760/AT1G20450/AT1G29390/AT1G29395/AT2G15970/AT2G42530/AT2G42540/AT2G46810/AT3G53460/AT3G55580/AT4G25470/AT4G25480/AT4G25490/AT4G29810/AT5G15960/AT5G59820	16	1527	59	21869	3.88381	1.82831e-06	0.000447477	0.000423926	*
Peaks	GO:0036293	response to decreased oxygen levels	AT1G05880/AT1G07135/AT1G07400/AT1G13260/AT1G13360/AT1G25550/AT1G25560/AT1G64280/AT1G66880/AT1G67360/AT1G68670/AT1G69890/AT1G74940/AT1G77120/AT2G15890/AT2G25735/AT2G36800/AT2G40140/AT2G47730/AT3G05120/AT3G10020/AT3G23170/AT3G30775/AT3G52430/AT3G56880/AT3G58670/AT3G60520/AT3G62410/AT4G17230/AT4G27450/AT5G05410/AT5G13190/AT5G20150/AT5G20250/AT5G25110/AT5G42200/AT5G54470/AT5G54940/AT5G54960/AT5G58070…	41	1527	272	21869	2.15876	2.55738e-06	0.000447477	0.000423926
Peaks	GO:0036294	cellular response to decreased oxygen levels	AT1G05880/AT1G07135/AT1G07400/AT1G13260/AT1G13360/AT1G25550/AT1G25560/AT1G66880/AT1G67360/AT1G68670/AT1G69890/AT1G74940/AT1G77120/AT2G15890/AT2G25735/AT2G36800/AT2G40140/AT2G47730/AT3G05120/AT3G10020/AT3G23170/AT3G30775/AT3G56880/AT3G58670/AT3G60520/AT3G62410/AT4G17230/AT4G27450/AT5G05410/AT5G13190/AT5G20150/AT5G20250/AT5G42200/AT5G54470/AT5G54940/AT5G54960/AT5G58070/AT5G59820	38	1527	244	21869	2.23041	2.66281e-06	0.000447477	0.000423926
Peaks	GO:0071453	cellular response to oxygen levels	AT1G05880/AT1G07135/AT1G07400/AT1G13260/AT1G13360/AT1G25550/AT1G25560/AT1G66880/AT1G67360/AT1G68670/AT1G69890/AT1G74940/AT1G77120/AT2G15890/AT2G25735/AT2G36800/AT2G40140/AT2G47730/AT3G05120/AT3G10020/AT3G23170/AT3G30775/AT3G56880/AT3G58670/AT3G60520/AT3G62410/AT4G17230/AT4G27450/AT5G05410/AT5G13190/AT5G20150/AT5G20250/AT5G42200/AT5G54470/AT5G54940/AT5G54960/AT5G58070/AT5G59820	38	1527	244	21869	2.23041	2.66281e-06	0.000447477	0.000423926
Peaks	GO:0010017	red or far-red light signaling pathway	AT1G02340/AT1G22280/AT2G20180/AT2G25930/AT2G40080/AT2G42540/AT2G46590/AT2G46790/AT2G47700/AT3G21150/AT3G59060/AT3G62090/AT5G02810/AT5G15960/AT5G59560	15	1527	54	21869	3.97821	2.75029e-06	0.000447477	0.000423926
Peaks	GO:0070482	response to oxygen levels	AT1G05880/AT1G07135/AT1G07400/AT1G13260/AT1G13360/AT1G25550/AT1G25560/AT1G64280/AT1G66880/AT1G67360/AT1G68670/AT1G69890/AT1G74940/AT1G77120/AT2G15890/AT2G25735/AT2G36800/AT2G40140/AT2G47730/AT3G05120/AT3G10020/AT3G23170/AT3G30775/AT3G52430/AT3G56880/AT3G58670/AT3G60520/AT3G62410/AT4G17230/AT4G27450/AT5G05410/AT5G13190/AT5G20150/AT5G20250/AT5G25110/AT5G42200/AT5G54470/AT5G54940/AT5G54960/AT5G58070…	41	1527	273	21869	2.15085	2.81024e-06	0.000447477	0.000423926
Peaks	GO:0009415	response to water	AT1G01620/AT1G04400/AT1G09340/AT1G12610/AT1G13740/AT1G15690/AT1G18390/AT1G20450/AT1G29395/AT1G52340/AT1G60200/AT1G63490/AT1G67360/AT1G68820/AT1G74920/AT1G77120/AT1G78380/AT2G05100/AT2G05520/AT2G15970/AT2G16600/AT2G17840/AT2G21660/AT2G31870/AT2G36270/AT2G39800/AT2G41240/AT2G42540/AT2G46590/AT3G15500/AT3G27690/AT3G29320/AT3G30775/AT3G45140/AT3G46620/AT3G46970/AT3G50500/AT3G56880/AT3G61050/AT3G63060…	55	1527	416	21869	1.89347	3.72554e-06	0.000525211	0.000497569
Peaks	GO:0009414	response to water deprivation	AT1G01620/AT1G04400/AT1G09340/AT1G12610/AT1G13740/AT1G15690/AT1G18390/AT1G20450/AT1G29395/AT1G52340/AT1G60200/AT1G63490/AT1G67360/AT1G68820/AT1G74920/AT1G77120/AT1G78380/AT2G05100/AT2G05520/AT2G15970/AT2G16600/AT2G17840/AT2G21660/AT2G31870/AT2G36270/AT2G39800/AT2G41240/AT2G42540/AT3G15500/AT3G27690/AT3G29320/AT3G30775/AT3G45140/AT3G46620/AT3G46970/AT3G50500/AT3G56880/AT3G61050/AT3G63060/AT4G04330…	54	1527	406	21869	1.90484	3.80588e-06	0.000525211	0.000497569
Peaks	GO:0001666	response to hypoxia	AT1G05880/AT1G07135/AT1G07400/AT1G13260/AT1G13360/AT1G25550/AT1G25560/AT1G64280/AT1G66880/AT1G67360/AT1G68670/AT1G69890/AT1G74940/AT1G77120/AT2G15890/AT2G25735/AT2G36800/AT2G40140/AT2G47730/AT3G05120/AT3G10020/AT3G23170/AT3G30775/AT3G52430/AT3G56880/AT3G58670/AT3G60520/AT4G17230/AT4G27450/AT5G05410/AT5G13190/AT5G20150/AT5G20250/AT5G25110/AT5G42200/AT5G54470/AT5G54940/AT5G54960/AT5G58070/AT5G59820	40	1527	268	21869	2.13754	4.31814e-06	0.00055866	0.000529256
Peaks	GO:0071456	cellular response to hypoxia	AT1G05880/AT1G07135/AT1G07400/AT1G13260/AT1G13360/AT1G25550/AT1G25560/AT1G66880/AT1G67360/AT1G68670/AT1G69890/AT1G74940/AT1G77120/AT2G15890/AT2G25735/AT2G36800/AT2G40140/AT2G47730/AT3G05120/AT3G10020/AT3G23170/AT3G30775/AT3G56880/AT3G58670/AT3G60520/AT4G17230/AT4G27450/AT5G05410/AT5G13190/AT5G20150/AT5G20250/AT5G42200/AT5G54470/AT5G54940/AT5G54960/AT5G58070/AT5G59820	37	1527	242	21869	2.18966	5.55253e-06	0.000676102	0.000640518
Peaks	GO:0009890	negative regulation of biosynthetic process	AT1G05420/AT1G06450/AT1G13260/AT1G13740/AT1G22760/AT1G28420/AT1G55500/AT1G68050/AT1G75080/AT1G75380/AT2G18290/AT2G22540/AT2G30424/AT2G36050/AT2G36080/AT2G42870/AT2G45620/AT2G46790/AT2G46830/AT2G47400/AT2G47870/AT3G01470/AT3G20800/AT3G21150/AT3G29575/AT3G61050/AT3G62410/AT4G04450/AT4G24800/AT4G27310/AT4G33980/AT4G37460/AT5G02160/AT5G02810/AT5G04820/AT5G13180/AT5G18600/AT5G24470/AT5G40790/AT5G40800…	47	1527	341	21869	1.97394	6.11961e-06	0.00068676	0.000650615
Peaks	GO:0031324	negative regulation of cellular metabolic process	AT1G05420/AT1G06450/AT1G13260/AT1G13740/AT1G22760/AT1G28420/AT1G55500/AT1G68050/AT1G75080/AT1G75380/AT1G75950/AT2G18290/AT2G22540/AT2G30424/AT2G36050/AT2G36080/AT2G42870/AT2G45620/AT2G46790/AT2G46830/AT2G47400/AT2G47870/AT3G01470/AT3G15850/AT3G18035/AT3G20800/AT3G21150/AT3G29575/AT3G50630/AT3G53460/AT3G57860/AT3G61050/AT3G62410/AT4G04020/AT4G04450/AT4G24800/AT4G27310/AT4G33980/AT4G37460/AT4G39100…	56	1527	435	21869	1.84369	6.86304e-06	0.00068676	0.000650615
Peaks	GO:2000113	negative regulation of cellular macromolecule biosynthetic process	AT1G05420/AT1G06450/AT1G13260/AT1G13740/AT1G22760/AT1G28420/AT1G55500/AT1G68050/AT1G75080/AT1G75380/AT2G18290/AT2G22540/AT2G30424/AT2G36050/AT2G36080/AT2G42870/AT2G45620/AT2G46790/AT2G46830/AT2G47870/AT3G01470/AT3G20800/AT3G21150/AT3G29575/AT3G61050/AT4G04450/AT4G24800/AT4G27310/AT4G33980/AT4G37460/AT5G02160/AT5G02810/AT5G04820/AT5G13180/AT5G18600/AT5G24470/AT5G40790/AT5G40800/AT5G42900/AT5G44180…	44	1527	313	21869	2.01325	7.21201e-06	0.00068676	0.000650615
Peaks	GO:0071214	cellular response to abiotic stimulus	AT1G02340/AT1G04400/AT1G09340/AT1G18390/AT1G19180/AT1G22280/AT1G29395/AT1G75100/AT1G78380/AT2G15970/AT2G20180/AT2G25930/AT2G30170/AT2G40080/AT2G42540/AT2G46590/AT2G46790/AT2G47700/AT3G21150/AT3G22840/AT3G44450/AT3G45780/AT3G52740/AT3G56710/AT3G59060/AT3G62090/AT5G02810/AT5G15960/AT5G19770/AT5G43630/AT5G57630/AT5G59560	32	1527	198	21869	2.31459	7.2989e-06	0.00068676	0.000650615
Peaks	GO:0104004	cellular response to environmental stimulus	AT1G02340/AT1G04400/AT1G09340/AT1G18390/AT1G19180/AT1G22280/AT1G29395/AT1G75100/AT1G78380/AT2G15970/AT2G20180/AT2G25930/AT2G30170/AT2G40080/AT2G42540/AT2G46590/AT2G46790/AT2G47700/AT3G21150/AT3G22840/AT3G44450/AT3G45780/AT3G52740/AT3G56710/AT3G59060/AT3G62090/AT5G02810/AT5G15960/AT5G19770/AT5G43630/AT5G57630/AT5G59560	32	1527	198	21869	2.31459	7.2989e-06	0.00068676	0.000650615
Peaks	GO:0010558	negative regulation of macromolecule biosynthetic process	AT1G05420/AT1G06450/AT1G13260/AT1G13740/AT1G22760/AT1G28420/AT1G55500/AT1G68050/AT1G75080/AT1G75380/AT2G18290/AT2G22540/AT2G30424/AT2G36050/AT2G36080/AT2G42870/AT2G45620/AT2G46790/AT2G46830/AT2G47870/AT3G01470/AT3G20800/AT3G21150/AT3G29575/AT3G61050/AT4G04450/AT4G24800/AT4G27310/AT4G33980/AT4G37460/AT5G02160/AT5G02810/AT5G04820/AT5G13180/AT5G18600/AT5G24470/AT5G40790/AT5G40800/AT5G42900/AT5G44180…	44	1527	315	21869	2.00047	8.50136e-06	0.000765122	0.000724853
Peaks	GO:0045892	negative regulation of transcription, DNA-templated	AT1G05420/AT1G13260/AT1G13740/AT1G28420/AT1G75080/AT1G75380/AT2G22540/AT2G30424/AT2G36050/AT2G36080/AT2G42870/AT2G46790/AT2G46830/AT2G47870/AT3G21150/AT3G29575/AT3G61050/AT4G04450/AT4G24800/AT4G27310/AT4G33980/AT4G37460/AT5G02810/AT5G04820/AT5G13180/AT5G18600/AT5G24470/AT5G40790/AT5G40800/AT5G42900/AT5G44180/AT5G50360/AT5G62430/AT5G63190	34	1527	219	21869	2.22344	9.38437e-06	0.000809402	0.000766802
Peaks	GO:0042752	regulation of circadian rhythm	AT1G04400/AT1G17455/AT1G22770/AT2G40080/AT2G46830/AT3G15620/AT3G20810/AT3G46640/AT3G63180/AT4G00540/AT4G33980/AT5G08330/AT5G28770/AT5G42900/AT5G59560	15	1527	60	21869	3.58039	1.13587e-05	0.00086691	0.000821283
Peaks	GO:1902679	negative regulation of RNA biosynthetic process	AT1G05420/AT1G13260/AT1G13740/AT1G28420/AT1G75080/AT1G75380/AT2G22540/AT2G30424/AT2G36050/AT2G36080/AT2G42870/AT2G46790/AT2G46830/AT2G47870/AT3G21150/AT3G29575/AT3G61050/AT4G04450/AT4G24800/AT4G27310/AT4G33980/AT4G37460/AT5G02810/AT5G04820/AT5G13180/AT5G18600/AT5G24470/AT5G40790/AT5G40800/AT5G42900/AT5G44180/AT5G50360/AT5G62430/AT5G63190	34	1527	221	21869	2.20331	1.14467e-05	0.00086691	0.000821283
Peaks	GO:1903507	negative regulation of nucleic acid-templated transcription	AT1G05420/AT1G13260/AT1G13740/AT1G28420/AT1G75080/AT1G75380/AT2G22540/AT2G30424/AT2G36050/AT2G36080/AT2G42870/AT2G46790/AT2G46830/AT2G47870/AT3G21150/AT3G29575/AT3G61050/AT4G04450/AT4G24800/AT4G27310/AT4G33980/AT4G37460/AT5G02810/AT5G04820/AT5G13180/AT5G18600/AT5G24470/AT5G40790/AT5G40800/AT5G42900/AT5G44180/AT5G50360/AT5G62430/AT5G63190	34	1527	221	21869	2.20331	1.14467e-05	0.00086691	0.000821283
Peaks	GO:0009637	response to blue light	AT1G02340/AT1G04400/AT1G22770/AT1G68050/AT1G70800/AT1G75100/AT3G01470/AT3G21150/AT3G22840/AT3G44450/AT3G45780/AT3G52740/AT3G59060/AT4G18390/AT4G33980/AT4G40060/AT5G39760/AT5G42900/AT5G43630	19	1527	90	21869	3.02344	1.17263e-05	0.00086691	0.000821283
Peaks	GO:0051253	negative regulation of RNA metabolic process	AT1G05420/AT1G13260/AT1G13740/AT1G28420/AT1G75080/AT1G75380/AT2G22540/AT2G30424/AT2G36050/AT2G36080/AT2G42870/AT2G46790/AT2G46830/AT2G47870/AT3G21150/AT3G29575/AT3G53460/AT3G61050/AT4G04450/AT4G24800/AT4G27310/AT4G33980/AT4G37460/AT5G02810/AT5G04820/AT5G13180/AT5G18600/AT5G24470/AT5G40790/AT5G40800/AT5G42900/AT5G44180/AT5G50360/AT5G62430/AT5G63190	35	1527	232	21869	2.16058	1.32329e-05	0.000944555	0.000894842
Peaks	GO:0001101	response to acid chemical	AT1G01620/AT1G04400/AT1G09340/AT1G12610/AT1G13740/AT1G15690/AT1G18390/AT1G20450/AT1G29395/AT1G52340/AT1G60200/AT1G63490/AT1G67360/AT1G68820/AT1G74920/AT1G77120/AT1G78380/AT2G05100/AT2G05520/AT2G15970/AT2G16600/AT2G17840/AT2G21660/AT2G31870/AT2G36270/AT2G39800/AT2G41240/AT2G42540/AT2G46590/AT3G15500/AT3G27690/AT3G29320/AT3G30775/AT3G45140/AT3G46620/AT3G46970/AT3G50500/AT3G56880/AT3G61050/AT3G63060…	56	1527	448	21869	1.79019	1.63595e-05	0.00112881	0.0010694
Peaks	GO:0045934	negative regulation of nucleobase-containing compound metabolic process	AT1G05420/AT1G13260/AT1G13740/AT1G28420/AT1G75080/AT1G75380/AT1G75950/AT2G22540/AT2G30424/AT2G36050/AT2G36080/AT2G42870/AT2G46790/AT2G46830/AT2G47870/AT3G18035/AT3G21150/AT3G29575/AT3G53460/AT3G61050/AT4G04450/AT4G24800/AT4G27310/AT4G33980/AT4G37460/AT5G02810/AT5G04820/AT5G13180/AT5G18600/AT5G24470/AT5G40790/AT5G40800/AT5G42900/AT5G44180/AT5G50360/AT5G62430/AT5G63190	37	1527	260	21869	2.03807	2.85515e-05	0.0019065	0.00180616
Peaks	GO:0044247	cellular polysaccharide catabolic process	AT1G10760/AT3G01510/AT3G29320/AT3G46970/AT4G09020/AT4G17090/AT5G55700/AT5G64860	8	1527	20	21869	5.72862	3.26742e-05	0.00211361	0.00200237	*
Peaks	GO:0010114	response to red light	AT1G22280/AT2G05100/AT2G20180/AT2G29090/AT2G31360/AT2G40080/AT2G46260/AT2G46590/AT2G47700/AT3G22840/AT3G27690/AT3G48100/AT4G33980/AT5G24470/AT5G42900	15	1527	66	21869	3.2549	3.85373e-05	0.00240725	0.00228055
Peaks	GO:0031327	negative regulation of cellular biosynthetic process	AT1G05420/AT1G06450/AT1G13260/AT1G13740/AT1G22760/AT1G28420/AT1G55500/AT1G68050/AT1G75080/AT1G75380/AT2G18290/AT2G22540/AT2G30424/AT2G36050/AT2G36080/AT2G42870/AT2G45620/AT2G46790/AT2G46830/AT2G47870/AT3G01470/AT3G20800/AT3G21150/AT3G29575/AT3G61050/AT4G04450/AT4G24800/AT4G27310/AT4G33980/AT4G37460/AT5G02160/AT5G02810/AT5G04820/AT5G13180/AT5G18600/AT5G24470/AT5G40790/AT5G40800/AT5G42900/AT5G44180…	44	1527	335	21869	1.88104	3.95393e-05	0.00240725	0.00228055
Peaks	GO:0071483	cellular response to blue light	AT1G02340/AT1G04400/AT1G75100/AT3G21150/AT3G22840/AT3G44450/AT3G45780/AT3G52740/AT5G43630	9	1527	27	21869	4.77385	5.70026e-05	0.0033713	0.00319386
Peaks	GO:0051172	negative regulation of nitrogen compound metabolic process	AT1G05420/AT1G06450/AT1G13260/AT1G13740/AT1G22760/AT1G28420/AT1G55500/AT1G75080/AT1G75380/AT1G75950/AT2G22540/AT2G30424/AT2G36050/AT2G36080/AT2G42870/AT2G45620/AT2G46790/AT2G46830/AT2G47870/AT3G01470/AT3G18035/AT3G20800/AT3G21150/AT3G29575/AT3G50630/AT3G53460/AT3G57860/AT3G61050/AT4G04450/AT4G24800/AT4G27310/AT4G33980/AT4G37460/AT4G39100/AT5G02160/AT5G02810/AT5G04820/AT5G13180/AT5G18600/AT5G24470…	48	1527	384	21869	1.79019	6.40381e-05	0.00368219	0.00348839
Peaks	GO:0009251	glucan catabolic process	AT1G10760/AT3G01510/AT3G29320/AT3G46970/AT4G09020/AT4G17090/AT5G20950/AT5G55700/AT5G64860	9	1527	28	21869	4.60335	7.88193e-05	0.00440962	0.00417753
Peaks	GO:0071396	cellular response to lipid	AT1G02340/AT1G07430/AT1G18390/AT1G19180/AT1G35160/AT1G51800/AT1G56650/AT1G64280/AT1G68360/AT1G70700/AT1G70790/AT1G70800/AT1G70810/AT1G74950/AT1G75080/AT2G01950/AT2G05100/AT2G20180/AT2G23070/AT2G32510/AT2G39260/AT2G41940/AT3G05120/AT3G05800/AT3G07360/AT3G15500/AT3G15730/AT3G17860/AT3G17980/AT3G27690/AT3G48360/AT3G50500/AT3G50700/AT3G52430/AT3G55620/AT3G63060/AT4G01026/AT4G26120/AT4G39070/AT5G01810…	54	1527	476	21869	1.62471	0.000295973	0.0161228	0.0152742
Peaks	GO:0055065	metal ion homeostasis	AT1G04400/AT1G22990/AT1G29060/AT1G66590/AT2G40300/AT2G41240/AT3G05030/AT3G08040/AT3G09390/AT3G56090/AT4G04770/AT4G14230/AT4G14240/AT4G16370/AT4G32060/AT4G33460/AT4G33520/AT4G33700/AT4G36820/AT4G39080/AT5G01490/AT5G02600/AT5G23630/AT5G25110/AT5G51720/AT5G58070/AT5G59030/AT5G59040	28	1527	199	21869	2.01509	0.000308452	0.0163717	0.01551
Peaks	GO:0005977	glycogen metabolic process	AT1G27680/AT2G36390/AT2G39930/AT3G29320/AT3G46970/AT5G17310	6	1527	15	21869	5.72862	0.000331499	0.0165759	0.0157035	*
Peaks	GO:0006112	energy reserve metabolic process	AT1G27680/AT2G36390/AT2G39930/AT3G29320/AT3G46970/AT5G17310	6	1527	15	21869	5.72862	0.000331499	0.0165759	0.0157035	*
Peaks	GO:0042592	homeostatic process	AT1G03120/AT1G04400/AT1G08135/AT1G08570/AT1G22990/AT1G29060/AT1G44800/AT1G60800/AT1G65950/AT1G66590/AT1G68670/AT1G77110/AT1G79530/AT2G05100/AT2G19860/AT2G28520/AT2G40090/AT2G40300/AT2G41240/AT2G46560/AT3G05030/AT3G08040/AT3G09390/AT3G27690/AT3G27785/AT3G28710/AT3G28715/AT3G50700/AT3G56090/AT4G04770/AT4G14230/AT4G14240/AT4G16370/AT4G27970/AT4G32060/AT4G33460/AT4G33520/AT4G33700/AT4G35460/AT4G36820…	55	1527	490	21869	1.60752	0.000340741	0.0165759	0.0157035
Peaks	GO:0006091	generation of precursor metabolites and energy	AT1G04410/AT1G27680/AT1G29920/AT1G29930/AT1G77120/AT1G79530/AT2G01918/AT2G05100/AT2G19860/AT2G34420/AT2G34430/AT2G36390/AT2G39930/AT2G45870/AT2G46820/AT3G01440/AT3G07480/AT3G10020/AT3G15640/AT3G15840/AT3G15850/AT3G22360/AT3G22370/AT3G27300/AT3G27380/AT3G27690/AT3G29320/AT3G46970/AT3G47470/AT3G49160/AT3G55440/AT3G60750/AT4G04020/AT4G26530/AT4G27800/AT4G32470/AT4G33470/AT4G33520/AT5G01500/AT5G08530…	47	1527	401	21869	1.67858	0.00034433	0.0165759	0.0157035
Peaks	GO:0009785	blue light signaling pathway	AT1G02340/AT1G04400/AT3G21150/AT3G44450/AT3G45780/AT3G52740/AT5G43630	7	1527	21	21869	4.77385	0.000388187	0.0176968	0.0167654
Peaks	GO:0030522	intracellular receptor signaling pathway	AT1G02340/AT1G04400/AT3G21150/AT3G44450/AT3G45780/AT3G52740/AT5G43630	7	1527	21	21869	4.77385	0.000388187	0.0176968	0.0167654
Peaks	GO:0055080	cation homeostasis	AT1G04400/AT1G08135/AT1G22990/AT1G29060/AT1G66590/AT2G28520/AT2G40300/AT2G41240/AT2G46560/AT3G05030/AT3G08040/AT3G09390/AT3G28710/AT3G28715/AT3G56090/AT4G04770/AT4G14230/AT4G14240/AT4G16370/AT4G32060/AT4G33460/AT4G33520/AT4G33700/AT4G36820/AT4G39080/AT5G01490/AT5G02600/AT5G23630/AT5G25110/AT5G51720/AT5G58070/AT5G59030/AT5G59040	33	1527	253	21869	1.86803	0.000393262	0.0176968	0.0167654
Peaks	GO:0048580	regulation of post-embryonic development	AT1G01040/AT1G04400/AT1G07430/AT1G13260/AT1G20450/AT1G22770/AT1G60190/AT1G68050/AT1G69570/AT1G77110/AT1G78600/AT2G16365/AT2G18040/AT2G20180/AT2G22540/AT2G22840/AT2G23070/AT2G25930/AT2G36270/AT2G36400/AT2G40080/AT2G45660/AT2G46590/AT3G02380/AT3G07650/AT3G21150/AT3G22840/AT3G27785/AT3G47620/AT3G50500/AT3G62420/AT3G63060/AT4G18390/AT4G26000/AT4G27310/AT4G28190/AT4G29830/AT4G39070/AT5G37260/AT5G45830…	43	1527	362	21869	1.70118	0.000455239	0.0200499	0.0189946
Peaks	GO:0006873	cellular ion homeostasis	AT1G03120/AT1G04400/AT1G29060/AT2G28520/AT2G40300/AT2G41240/AT2G46560/AT3G05030/AT3G08040/AT3G09390/AT3G28710/AT3G28715/AT3G56090/AT4G04770/AT4G16370/AT4G27970/AT4G32060/AT4G36820/AT4G39080/AT5G01490/AT5G23630/AT5G25110/AT5G58070/AT5G59030/AT5G59040	25	1527	175	21869	2.04594	0.000501998	0.0216487	0.0205093
Peaks	GO:2000026	regulation of multicellular organismal development	AT1G01040/AT1G04400/AT1G07430/AT1G13260/AT1G20450/AT1G22770/AT1G60190/AT1G68050/AT1G69570/AT1G77110/AT1G78600/AT2G16365/AT2G18040/AT2G20180/AT2G22540/AT2G22840/AT2G23070/AT2G25930/AT2G36270/AT2G36400/AT2G40080/AT2G45660/AT2G46590/AT3G02380/AT3G07650/AT3G21150/AT3G22840/AT3G27785/AT3G47620/AT3G48110/AT3G50500/AT3G62420/AT3G63060/AT4G18390/AT4G26000/AT4G27310/AT4G28190/AT4G29830/AT4G39070/AT5G37260…	44	1527	376	21869	1.67593	0.000541048	0.0228565	0.0216536
Peaks	GO:0098771	inorganic ion homeostasis	AT1G04400/AT1G08135/AT1G22990/AT1G29060/AT1G66590/AT1G68670/AT2G28520/AT2G40300/AT2G41240/AT2G46560/AT3G05030/AT3G08040/AT3G09390/AT3G28710/AT3G28715/AT3G56090/AT4G04770/AT4G14230/AT4G14240/AT4G16370/AT4G32060/AT4G33460/AT4G33520/AT4G33700/AT4G36820/AT4G39080/AT5G01490/AT5G02600/AT5G23630/AT5G25110/AT5G51720/AT5G58070/AT5G59030/AT5G59040	34	1527	269	21869	1.81016	0.00057707	0.0238907	0.0226333
Peaks	GO:0048878	chemical homeostasis	AT1G03120/AT1G04400/AT1G08135/AT1G22990/AT1G29060/AT1G44800/AT1G65950/AT1G66590/AT1G68670/AT1G77110/AT1G79530/AT2G05100/AT2G19860/AT2G28520/AT2G40090/AT2G40300/AT2G41240/AT2G46560/AT3G05030/AT3G08040/AT3G09390/AT3G27690/AT3G27785/AT3G28710/AT3G28715/AT3G50700/AT3G56090/AT4G04770/AT4G14230/AT4G14240/AT4G16370/AT4G27970/AT4G32060/AT4G33460/AT4G33520/AT4G33700/AT4G36820/AT4G37390/AT4G39080/AT5G01490…	49	1527	434	21869	1.61695	0.000613354	0.0244725	0.0231844
Peaks	GO:0005982	starch metabolic process	AT1G10760/AT1G15690/AT1G27680/AT2G36390/AT2G39930/AT3G01510/AT4G09020/AT4G17090/AT4G18240/AT4G28706/AT5G51820/AT5G51830/AT5G55700/AT5G64860	14	1527	75	21869	2.67335	0.000614767	0.0244725	0.0231844	*
Peaks	GO:0009648	photoperiodism	AT1G04400/AT1G17455/AT1G18390/AT1G22770/AT1G25560/AT1G69570/AT1G79000/AT2G23070/AT2G25930/AT2G39260/AT2G40080/AT2G46830/AT2G47700/AT3G01460/AT3G07650/AT3G12130/AT3G15620/AT4G26000/AT4G33980/AT4G39100/AT4G40060/AT5G42900	22	1527	149	21869	2.11459	0.000676355	0.026377	0.0249887
Peaks	GO:0050801	ion homeostasis	AT1G03120/AT1G04400/AT1G08135/AT1G22990/AT1G29060/AT1G66590/AT1G68670/AT2G28520/AT2G40300/AT2G41240/AT2G46560/AT3G05030/AT3G08040/AT3G09390/AT3G28710/AT3G28715/AT3G56090/AT4G04770/AT4G14230/AT4G14240/AT4G16370/AT4G27970/AT4G32060/AT4G33460/AT4G33520/AT4G33700/AT4G36820/AT4G39080/AT5G01490/AT5G02600/AT5G23630/AT5G25110/AT5G51720/AT5G58070/AT5G59030/AT5G59040	36	1527	293	21869	1.75964	0.000688096	0.026377	0.0249887
Peaks	GO:0005983	starch catabolic process	AT1G10760/AT3G01510/AT4G09020/AT4G17090/AT5G55700/AT5G64860	6	1527	17	21869	5.05466	0.000726041	0.0271749	0.0257446
Peaks	GO:0010228	vegetative to reproductive phase transition of meristem	AT1G01040/AT1G04400/AT1G18390/AT1G22770/AT1G25560/AT1G28420/AT1G69570/AT1G79000/AT2G01520/AT2G02760/AT2G21660/AT2G23070/AT2G25930/AT2G40080/AT2G42200/AT2G46830/AT2G47700/AT3G01460/AT3G07650/AT3G12130/AT3G21060/AT3G27785/AT3G63060/AT4G26000/AT4G33980/AT4G39100/AT4G40060/AT5G42900/AT5G44180/AT5G62040/AT5G62430	31	1527	241	21869	1.84219	0.000735166	0.0271749	0.0257446
Peaks	GO:0019725	cellular homeostasis	AT1G03120/AT1G04400/AT1G08570/AT1G29060/AT2G19860/AT2G28520/AT2G40300/AT2G41240/AT2G46560/AT3G05030/AT3G08040/AT3G09390/AT3G28710/AT3G28715/AT3G56090/AT4G04770/AT4G16370/AT4G27970/AT4G32060/AT4G35460/AT4G36820/AT4G39080/AT5G01490/AT5G06690/AT5G10860/AT5G23630/AT5G25110/AT5G28770/AT5G54290/AT5G58070/AT5G59030/AT5G59040	32	1527	254	21869	1.80429	0.00087071	0.0316205	0.0299563
Peaks	GO:0010109	regulation of photosynthesis	AT1G01790/AT2G45870/AT2G47400/AT3G15850/AT3G62410/AT4G04020/AT4G27800/AT4G33470/AT5G52520/AT5G66570	10	1527	45	21869	3.18257	0.000894452	0.0319227	0.0302425
Peaks	GO:0055082	cellular chemical homeostasis	AT1G03120/AT1G04400/AT1G29060/AT2G19860/AT2G28520/AT2G40300/AT2G41240/AT2G46560/AT3G05030/AT3G08040/AT3G09390/AT3G28710/AT3G28715/AT3G56090/AT4G04770/AT4G16370/AT4G27970/AT4G32060/AT4G36820/AT4G39080/AT5G01490/AT5G23630/AT5G25110/AT5G28770/AT5G58070/AT5G59030/AT5G59040	27	1527	203	21869	1.90484	0.000945432	0.033124	0.0313807
Peaks	GO:0009768	photosynthesis, light harvesting in photosystem I	AT1G29920/AT1G29930/AT2G05100/AT2G34420/AT2G34430/AT3G27690/AT3G47470	7	1527	24	21869	4.17712	0.000960117	0.033124	0.0313807
Peaks	GO:0030003	cellular cation homeostasis	AT1G04400/AT1G29060/AT2G28520/AT2G40300/AT2G41240/AT2G46560/AT3G05030/AT3G08040/AT3G09390/AT3G28710/AT3G28715/AT3G56090/AT4G04770/AT4G16370/AT4G32060/AT4G36820/AT4G39080/AT5G01490/AT5G23630/AT5G25110/AT5G58070/AT5G59030/AT5G59040	23	1527	163	21869	2.02083	0.000979598	0.0332421	0.0314925
Peaks	GO:0015979	photosynthesis	AT1G01790/AT1G20020/AT1G29920/AT1G29930/AT1G54130/AT2G01918/AT2G05100/AT2G34420/AT2G34430/AT2G40300/AT2G45870/AT2G46820/AT2G47400/AT3G01440/AT3G15850/AT3G27690/AT3G47470/AT3G56090/AT3G60750/AT3G62410/AT4G04020/AT4G27800/AT4G33470/AT4G33520/AT5G01500/AT5G08410/AT5G23440/AT5G52520/AT5G66570	29	1527	225	21869	1.84589	0.0010372	0.0346292	0.0328066
Peaks	GO:0044275	cellular carbohydrate catabolic process	AT1G10760/AT1G22650/AT3G01510/AT3G29320/AT3G46970/AT3G55440/AT4G09020/AT4G17090/AT5G55700/AT5G64860	10	1527	46	21869	3.11338	0.00107237	0.0346846	0.0328591	*
Peaks	GO:2000030	regulation of response to red or far red light	AT1G18400/AT1G78600/AT2G16365/AT2G20180/AT2G47700/AT4G04770/AT4G18390/AT4G27310/AT4G39070/AT5G08130	10	1527	46	21869	3.11338	0.00107237	0.0346846	0.0328591
Peaks	GO:0030004	cellular monovalent inorganic cation homeostasis	AT1G29060/AT2G28520/AT2G46560/AT3G05030/AT3G28710/AT3G28715/AT4G39080/AT5G25110/AT5G58070	9	1527	39	21869	3.30497	0.00120419	0.0383487	0.0363304

## Sheet: Supplementary Table S5
Supplementary Table S5. The significantly enriched GO terms for the lists of genes respecting the MYC2 peaks, and BSs predicted within peaks by PWM, BaMM, and SiteGA models. The criterion p_adj < 0.05 was used for analysis. The column 'common GO terms' marks GO terms with the significance of enrichment (p_adj < 0.05) for PWM, BaMM and SiteGA motif models simultaneously.
Gene list	ID	Description	geneID	Count, observed	Total, observed	Count, expected	Total, expected	fold	pvalue	p_adj	qvalue	common GO terms
PWM	GO:0009611	response to wounding	AT1G01720/AT1G17380/AT1G17420/AT1G19180/AT1G20510/AT1G27730/AT1G30135/AT1G32640/AT1G32920/AT1G51760/AT1G61340/AT1G66760/AT1G70700/AT1G72290/AT1G72450/AT1G73080/AT1G73500/AT1G74930/AT1G74950/AT2G02860/AT2G06050/AT2G22330/AT2G27690/AT2G30020/AT2G34600/AT2G42440/AT2G44810/AT2G46510/AT2G46970/AT3G14050/AT3G16470/AT3G17860/AT3G22275/AT3G25250/AT3G44260/AT3G51440/AT3G51450/AT3G51460/AT4G15440/AT4G24350…	50	939	243	21869	4.79211	1.2746e-20	2.32743e-17	2.19769e-17	*
PWM	GO:0009753	response to jasmonic acid	AT1G17380/AT1G17420/AT1G19180/AT1G19570/AT1G20510/AT1G28290/AT1G30135/AT1G32640/AT1G44350/AT1G61340/AT1G70700/AT1G72450/AT1G73080/AT1G74950/AT2G18790/AT2G34600/AT2G38240/AT2G39770/AT3G15210/AT3G15500/AT3G16470/AT3G17860/AT3G22160/AT3G22275/AT3G27810/AT3G50660/AT3G51440/AT3G51450/AT3G55970/AT4G23100/AT4G35890/AT5G13220/AT5G24770/AT5G42650/AT5G46760/AT5G47220/AT5G53060/AT5G55120/AT5G56980/AT5G63970…	42	939	204	21869	4.79493	1.54941e-17	1.41461e-14	1.33575e-14	*
PWM	GO:0070542	response to fatty acid	AT1G17380/AT1G17420/AT1G19180/AT1G19570/AT1G20510/AT1G28290/AT1G30135/AT1G32640/AT1G44350/AT1G61340/AT1G70700/AT1G72450/AT1G73080/AT1G74950/AT2G18790/AT2G34600/AT2G38240/AT2G39770/AT3G15210/AT3G15500/AT3G16470/AT3G17860/AT3G22160/AT3G22275/AT3G27810/AT3G50660/AT3G51440/AT3G51450/AT3G55970/AT4G23100/AT4G35890/AT5G13220/AT5G24770/AT5G42650/AT5G46760/AT5G47220/AT5G53060/AT5G55120/AT5G56980/AT5G63970…	42	939	208	21869	4.70272	3.26449e-17	1.98699e-14	1.87622e-14	*
PWM	GO:0009867	jasmonic acid mediated signaling pathway	AT1G17380/AT1G19180/AT1G30135/AT1G32640/AT1G70700/AT1G72450/AT1G74950/AT2G18790/AT2G34600/AT2G38240/AT3G15210/AT3G15500/AT3G17860/AT3G22160/AT3G22275/AT3G27810/AT3G50660/AT3G55970/AT5G13220/AT5G47220/AT5G53060/AT5G63970/AT5G64810/AT5G67300	24	939	107	21869	5.22385	1.93699e-11	8.84236e-09	8.34945e-09	*
PWM	GO:0071395	cellular response to jasmonic acid stimulus	AT1G17380/AT1G19180/AT1G30135/AT1G32640/AT1G70700/AT1G72450/AT1G74950/AT2G18790/AT2G34600/AT2G38240/AT3G15210/AT3G15500/AT3G17860/AT3G22160/AT3G22275/AT3G27810/AT3G50660/AT3G55970/AT5G13220/AT5G47220/AT5G53060/AT5G63970/AT5G64810/AT5G67300	24	939	111	21869	5.0356	4.42472e-11	1.61591e-08	1.52583e-08	*
PWM	GO:0071398	cellular response to fatty acid	AT1G17380/AT1G19180/AT1G30135/AT1G32640/AT1G70700/AT1G72450/AT1G74950/AT2G18790/AT2G34600/AT2G38240/AT3G15210/AT3G15500/AT3G17860/AT3G22160/AT3G22275/AT3G27810/AT3G50660/AT3G55970/AT5G13220/AT5G47220/AT5G53060/AT5G63970/AT5G64810/AT5G67300	24	939	115	21869	4.86045	9.7174e-11	2.95733e-08	2.79247e-08	*
PWM	GO:2000022	regulation of jasmonic acid mediated signaling pathway	AT1G17380/AT1G19180/AT1G30135/AT1G70700/AT1G72450/AT1G74950/AT2G34600/AT2G38240/AT3G17860/AT3G22160/AT3G22275/AT3G55970/AT5G13220/AT5G67300	14	939	42	21869	7.76322	1.13045e-09	2.69484e-07	2.54462e-07	*
PWM	GO:0071456	cellular response to hypoxia	AT1G01720/AT1G03610/AT1G09070/AT1G19250/AT1G27730/AT1G35140/AT1G61340/AT1G66880/AT1G68670/AT1G73500/AT1G74940/AT1G76600/AT2G26150/AT2G36220/AT2G41430/AT3G02040/AT3G07350/AT3G08720/AT3G10020/AT3G15210/AT3G18290/AT3G25250/AT3G55980/AT4G01250/AT4G17230/AT4G24110/AT4G24570/AT4G32480/AT5G19120/AT5G54940/AT5G54960/AT5G57560/AT5G59820/AT5G64260	34	939	242	21869	3.2721	1.18602e-09	2.69484e-07	2.54462e-07	*
PWM	GO:0036294	cellular response to decreased oxygen levels	AT1G01720/AT1G03610/AT1G09070/AT1G19250/AT1G27730/AT1G35140/AT1G61340/AT1G66880/AT1G68670/AT1G73500/AT1G74940/AT1G76600/AT2G26150/AT2G36220/AT2G41430/AT3G02040/AT3G07350/AT3G08720/AT3G10020/AT3G15210/AT3G18290/AT3G25250/AT3G55980/AT4G01250/AT4G17230/AT4G24110/AT4G24570/AT4G32480/AT5G19120/AT5G54940/AT5G54960/AT5G57560/AT5G59820/AT5G64260	34	939	244	21869	3.24528	1.47582e-09	2.69484e-07	2.54462e-07	*
PWM	GO:0071453	cellular response to oxygen levels	AT1G01720/AT1G03610/AT1G09070/AT1G19250/AT1G27730/AT1G35140/AT1G61340/AT1G66880/AT1G68670/AT1G73500/AT1G74940/AT1G76600/AT2G26150/AT2G36220/AT2G41430/AT3G02040/AT3G07350/AT3G08720/AT3G10020/AT3G15210/AT3G18290/AT3G25250/AT3G55980/AT4G01250/AT4G17230/AT4G24110/AT4G24570/AT4G32480/AT5G19120/AT5G54940/AT5G54960/AT5G57560/AT5G59820/AT5G64260	34	939	244	21869	3.24528	1.47582e-09	2.69484e-07	2.54462e-07	*
PWM	GO:0001666	response to hypoxia	AT1G01720/AT1G03610/AT1G09070/AT1G19250/AT1G27730/AT1G35140/AT1G61340/AT1G66880/AT1G68670/AT1G73500/AT1G74940/AT1G76600/AT2G26150/AT2G36220/AT2G41430/AT3G02040/AT3G07350/AT3G08720/AT3G10020/AT3G15210/AT3G18290/AT3G25250/AT3G55980/AT4G01250/AT4G17230/AT4G24110/AT4G24570/AT4G32480/AT5G19120/AT5G54940/AT5G54960/AT5G57560/AT5G59820/AT5G64260	34	939	268	21869	2.95466	1.67595e-08	2.78208e-06	2.62699e-06	*
PWM	GO:0036293	response to decreased oxygen levels	AT1G01720/AT1G03610/AT1G09070/AT1G19250/AT1G27730/AT1G35140/AT1G61340/AT1G66880/AT1G68670/AT1G73500/AT1G74940/AT1G76600/AT2G26150/AT2G36220/AT2G41430/AT3G02040/AT3G07350/AT3G08720/AT3G10020/AT3G15210/AT3G18290/AT3G25250/AT3G55980/AT4G01250/AT4G17230/AT4G24110/AT4G24570/AT4G32480/AT5G19120/AT5G54940/AT5G54960/AT5G57560/AT5G59820/AT5G64260	34	939	272	21869	2.91121	2.43367e-08	3.70324e-06	3.49681e-06	*
PWM	GO:0070482	response to oxygen levels	AT1G01720/AT1G03610/AT1G09070/AT1G19250/AT1G27730/AT1G35140/AT1G61340/AT1G66880/AT1G68670/AT1G73500/AT1G74940/AT1G76600/AT2G26150/AT2G36220/AT2G41430/AT3G02040/AT3G07350/AT3G08720/AT3G10020/AT3G15210/AT3G18290/AT3G25250/AT3G55980/AT4G01250/AT4G17230/AT4G24110/AT4G24570/AT4G32480/AT5G19120/AT5G54940/AT5G54960/AT5G57560/AT5G59820/AT5G64260	34	939	273	21869	2.90054	2.66803e-08	3.74756e-06	3.53865e-06	*
PWM	GO:0071396	cellular response to lipid	AT1G01720/AT1G12240/AT1G17380/AT1G18720/AT1G19180/AT1G30135/AT1G32640/AT1G69260/AT1G69270/AT1G70700/AT1G72450/AT1G74950/AT1G78700/AT2G18790/AT2G30020/AT2G34600/AT2G38240/AT2G38310/AT2G41070/AT3G15210/AT3G15500/AT3G17860/AT3G22160/AT3G22275/AT3G27810/AT3G50660/AT3G55530/AT3G55970/AT3G63060/AT4G18890/AT4G27920/AT4G38740/AT4G39400/AT5G05440/AT5G08130/AT5G08520/AT5G10720/AT5G13220/AT5G47220/AT5G53060…	45	939	476	21869	2.20175	6.73182e-07	8.78022e-05	8.29077e-05	*
PWM	GO:0080134	regulation of response to stress	AT1G02660/AT1G10370/AT1G17380/AT1G19180/AT1G19250/AT1G28280/AT1G30135/AT1G32640/AT1G44350/AT1G70700/AT1G72450/AT1G74950/AT2G18790/AT2G20880/AT2G20890/AT2G22330/AT2G34600/AT2G38240/AT2G47780/AT3G14990/AT3G15210/AT3G17860/AT3G22275/AT3G26830/AT3G55970/AT3G57860/AT3G62590/AT4G19030/AT4G24560/AT4G25520/AT4G37260/AT4G39030/AT5G05300/AT5G08520/AT5G13220/AT5G14930/AT5G47220/AT5G52440/AT5G53060/AT5G67300	40	939	408	21869	2.2833	1.12565e-06	0.000137029	0.00012939
PWM	GO:0002213	defense response to insect	AT1G02660/AT1G32640/AT1G74930/AT2G38240/AT3G28740/AT3G44260/AT3G55970/AT3G62590/AT4G23100/AT5G24770	10	939	35	21869	6.65419	1.39963e-06	0.000159732	0.000150828	*
PWM	GO:0042435	indole-containing compound biosynthetic process	AT1G25220/AT1G32640/AT1G69370/AT1G73500/AT2G04400/AT2G20610/AT2G22330/AT2G36230/AT3G26830/AT4G23100/AT5G05590/AT5G57890	12	939	54	21869	5.17548	2.37065e-06	0.000254636	0.000240441	*
PWM	GO:0031347	regulation of defense response	AT1G02660/AT1G17380/AT1G19180/AT1G19250/AT1G28280/AT1G30135/AT1G32640/AT1G44350/AT1G70700/AT1G72450/AT1G74950/AT2G18790/AT2G22330/AT2G34600/AT2G38240/AT3G15210/AT3G17860/AT3G22275/AT3G26830/AT3G55970/AT3G57860/AT3G62590/AT4G19030/AT4G39030/AT5G05300/AT5G13220/AT5G14930/AT5G47220/AT5G53060/AT5G67300	30	939	275	21869	2.54069	2.92004e-06	0.000296222	0.000279709
PWM	GO:0009695	jasmonic acid biosynthetic process	AT1G17420/AT1G20510/AT2G06050/AT2G44810/AT3G25760/AT3G25770/AT3G25780/AT5G42650/AT5G63980	9	939	32	21869	6.55022	5.48452e-06	0.000527091	0.000497709	*
PWM	GO:0042430	indole-containing compound metabolic process	AT1G25220/AT1G32640/AT1G69370/AT1G73500/AT2G04400/AT2G20610/AT2G22330/AT2G36230/AT3G26830/AT4G23100/AT4G34410/AT5G05590/AT5G27520/AT5G57890	14	939	79	21869	4.12728	6.05827e-06	0.00055312	0.000522287	*
PWM	GO:0006568	tryptophan metabolic process	AT1G25220/AT1G32640/AT1G69370/AT2G04400/AT2G22330/AT2G36230/AT4G34410/AT5G05590/AT5G57890	9	939	34	21869	6.16491	9.49261e-06	0.000787887	0.000743967	*
PWM	GO:0006586	indolalkylamine metabolic process	AT1G25220/AT1G32640/AT1G69370/AT2G04400/AT2G22330/AT2G36230/AT4G34410/AT5G05590/AT5G57890	9	939	34	21869	6.16491	9.49261e-06	0.000787887	0.000743967	*
PWM	GO:0009694	jasmonic acid metabolic process	AT1G17420/AT1G20510/AT1G44350/AT2G06050/AT2G44810/AT3G25760/AT3G25770/AT3G25780/AT5G10300/AT5G42650/AT5G63980	11	939	57	21869	4.4945	2.59774e-05	0.00206238	0.00194741	*
PWM	GO:0009414	response to water deprivation	AT1G10370/AT1G12110/AT1G12610/AT1G15360/AT1G27730/AT1G32640/AT1G52890/AT1G54100/AT1G60200/AT1G68010/AT1G69270/AT1G74920/AT2G20880/AT2G20890/AT2G41070/AT2G41430/AT2G45960/AT2G47780/AT3G05640/AT3G05700/AT3G15500/AT3G25760/AT3G26830/AT3G46620/AT3G55530/AT3G63060/AT4G38680/AT5G08520/AT5G13750/AT5G15960/AT5G15970/AT5G52440/AT5G59220/AT5G59550/AT5G63980/AT5G67300	36	939	406	21869	2.06509	3.45844e-05	0.00263129	0.00248461	*
PWM	GO:0009415	response to water	AT1G10370/AT1G12110/AT1G12610/AT1G15360/AT1G27730/AT1G32640/AT1G52890/AT1G54100/AT1G60200/AT1G68010/AT1G69270/AT1G74920/AT2G20880/AT2G20890/AT2G41070/AT2G41430/AT2G45960/AT2G47780/AT3G05640/AT3G05700/AT3G15500/AT3G25760/AT3G26830/AT3G46620/AT3G55530/AT3G63060/AT4G38680/AT5G08520/AT5G13750/AT5G15960/AT5G15970/AT5G52440/AT5G59220/AT5G59550/AT5G63980/AT5G67300	36	939	416	21869	2.01545	5.7357e-05	0.00418936	0.00395582	*
PWM	GO:0001101	response to acid chemical	AT1G10370/AT1G12110/AT1G12610/AT1G15360/AT1G27730/AT1G32640/AT1G52890/AT1G54100/AT1G60200/AT1G61340/AT1G68010/AT1G69270/AT1G74920/AT2G20880/AT2G20890/AT2G41070/AT2G41430/AT2G45960/AT2G47780/AT3G05640/AT3G05700/AT3G15500/AT3G25760/AT3G26830/AT3G46620/AT3G55530/AT3G63060/AT4G38680/AT5G08520/AT5G13750/AT5G15960/AT5G15970/AT5G52440/AT5G59220/AT5G59550/AT5G63980/AT5G67300	37	939	448	21869	1.92348	0.0001195	0.00814824	0.00769402	*
PWM	GO:0009966	regulation of signal transduction	AT1G01720/AT1G17380/AT1G19180/AT1G19570/AT1G30135/AT1G70700/AT1G72450/AT1G74950/AT1G78570/AT1G80440/AT2G34600/AT2G38240/AT2G40940/AT3G15210/AT3G17860/AT3G22160/AT3G22275/AT3G48430/AT3G55530/AT3G55970/AT4G24580/AT4G34410/AT4G37260/AT4G39403/AT5G08520/AT5G10720/AT5G13220/AT5G59220/AT5G63980/AT5G67300	30	939	334	21869	2.09189	0.000120483	0.00814824	0.00769402	*
PWM	GO:0023051	regulation of signaling	AT1G01720/AT1G17380/AT1G19180/AT1G19570/AT1G30135/AT1G70700/AT1G72450/AT1G74950/AT1G78570/AT1G80440/AT2G34600/AT2G38240/AT2G40940/AT3G15210/AT3G17860/AT3G22160/AT3G22275/AT3G48430/AT3G55530/AT3G55970/AT4G24580/AT4G34410/AT4G37260/AT4G39403/AT5G08520/AT5G10720/AT5G13220/AT5G59220/AT5G63980/AT5G67300	30	939	340	21869	2.05497	0.000164919	0.0107551	0.0101555	*
PWM	GO:0010646	regulation of cell communication	AT1G01720/AT1G17380/AT1G19180/AT1G19570/AT1G30135/AT1G70700/AT1G72450/AT1G74950/AT1G78570/AT1G80440/AT2G34600/AT2G38240/AT2G40940/AT3G15210/AT3G17860/AT3G22160/AT3G22275/AT3G48430/AT3G55530/AT3G55970/AT4G24580/AT4G34410/AT4G37260/AT4G39403/AT5G08520/AT5G10720/AT5G13220/AT5G59220/AT5G63980/AT5G67300	30	939	344	21869	2.03108	0.000202169	0.0127297	0.0120201	*
PWM	GO:0000162	tryptophan biosynthetic process	AT1G25220/AT1G69370/AT2G04400/AT2G36230/AT5G05590/AT5G57890	6	939	23	21869	6.07557	0.000331962	0.0195536	0.0184636
PWM	GO:0046219	indolalkylamine biosynthetic process	AT1G25220/AT1G69370/AT2G04400/AT2G36230/AT5G05590/AT5G57890	6	939	23	21869	6.07557	0.000331962	0.0195536	0.0184636
PWM	GO:0072330	monocarboxylic acid biosynthetic process	AT1G17420/AT1G19250/AT1G20510/AT1G74960/AT2G06050/AT2G20610/AT2G22330/AT2G41070/AT2G44810/AT2G45690/AT3G05020/AT3G06650/AT3G14990/AT3G24220/AT3G25760/AT3G25770/AT3G25780/AT4G39030/AT5G08520/AT5G16390/AT5G42650/AT5G63980	22	939	243	21869	2.10853	0.000832705	0.0475162	0.0448675
BaMM	GO:0009611	response to wounding	AT1G01720/AT1G17380/AT1G17420/AT1G19180/AT1G20510/AT1G27730/AT1G30135/AT1G32640/AT1G32920/AT1G51760/AT1G53830/AT1G61340/AT1G66760/AT1G70700/AT1G72450/AT1G73080/AT1G73500/AT1G74930/AT1G74950/AT1G80840/AT2G02860/AT2G06050/AT2G22330/AT2G27690/AT2G30020/AT2G34600/AT2G42440/AT2G44810/AT2G46510/AT2G46970/AT3G14050/AT3G16470/AT3G17860/AT3G22275/AT3G25250/AT3G51440/AT3G51450/AT3G51460/AT4G15440/AT4G24350…	51	1048	243	21869	4.37957	2.41257e-19	4.54045e-16	4.28929e-16	*
BaMM	GO:0009753	response to jasmonic acid	AT1G17380/AT1G17420/AT1G19180/AT1G19570/AT1G20510/AT1G21910/AT1G28480/AT1G30135/AT1G32640/AT1G44350/AT1G61340/AT1G70700/AT1G72450/AT1G73080/AT1G74950/AT2G18790/AT2G34600/AT2G38240/AT2G39770/AT3G15210/AT3G15500/AT3G16470/AT3G17860/AT3G22275/AT3G27810/AT3G50660/AT3G51440/AT3G51450/AT3G55970/AT4G23100/AT4G28910/AT4G35890/AT5G13220/AT5G17490/AT5G24770/AT5G40350/AT5G42650/AT5G46760/AT5G47220/AT5G53060…	46	1048	204	21869	4.70539	6.97451e-19	6.56301e-16	6.19997e-16	*
BaMM	GO:0070542	response to fatty acid	AT1G17380/AT1G17420/AT1G19180/AT1G19570/AT1G20510/AT1G21910/AT1G28480/AT1G30135/AT1G32640/AT1G44350/AT1G61340/AT1G70700/AT1G72450/AT1G73080/AT1G74950/AT2G18790/AT2G34600/AT2G38240/AT2G39770/AT3G15210/AT3G15500/AT3G16470/AT3G17860/AT3G22275/AT3G27810/AT3G50660/AT3G51440/AT3G51450/AT3G55970/AT4G23100/AT4G28910/AT4G35890/AT5G13220/AT5G17490/AT5G24770/AT5G40350/AT5G42650/AT5G46760/AT5G47220/AT5G53060…	46	1048	208	21869	4.6149	1.58921e-18	9.96965e-16	9.41817e-16	*
BaMM	GO:0009867	jasmonic acid mediated signaling pathway	AT1G17380/AT1G19180/AT1G28480/AT1G30135/AT1G32640/AT1G70700/AT1G72450/AT1G74950/AT2G18790/AT2G34600/AT2G38240/AT3G15210/AT3G15500/AT3G17860/AT3G22275/AT3G27810/AT3G50660/AT3G55970/AT4G28910/AT5G13220/AT5G17490/AT5G40350/AT5G47220/AT5G53060/AT5G63970/AT5G64810/AT5G67300	27	1048	107	21869	5.2656	6.76935e-13	3.18498e-10	3.0088e-10	*
BaMM	GO:0071395	cellular response to jasmonic acid stimulus	AT1G17380/AT1G19180/AT1G28480/AT1G30135/AT1G32640/AT1G70700/AT1G72450/AT1G74950/AT2G18790/AT2G34600/AT2G38240/AT3G15210/AT3G15500/AT3G17860/AT3G22275/AT3G27810/AT3G50660/AT3G55970/AT4G28910/AT5G13220/AT5G17490/AT5G40350/AT5G47220/AT5G53060/AT5G63970/AT5G64810/AT5G67300	27	1048	111	21869	5.07585	1.74783e-12	6.57884e-10	6.21493e-10	*
BaMM	GO:0071398	cellular response to fatty acid	AT1G17380/AT1G19180/AT1G28480/AT1G30135/AT1G32640/AT1G70700/AT1G72450/AT1G74950/AT2G18790/AT2G34600/AT2G38240/AT3G15210/AT3G15500/AT3G17860/AT3G22275/AT3G27810/AT3G50660/AT3G55970/AT4G28910/AT5G13220/AT5G17490/AT5G40350/AT5G47220/AT5G53060/AT5G63970/AT5G64810/AT5G67300	27	1048	115	21869	4.89929	4.31057e-12	1.35208e-09	1.27729e-09	*
BaMM	GO:0071456	cellular response to hypoxia	AT1G01720/AT1G03610/AT1G19250/AT1G27730/AT1G35140/AT1G53840/AT1G61340/AT1G66880/AT1G68670/AT1G69890/AT1G73500/AT1G74940/AT1G76600/AT2G26150/AT2G41430/AT3G02040/AT3G07350/AT3G08720/AT3G10020/AT3G15210/AT3G18290/AT3G25250/AT3G55980/AT3G56880/AT4G01250/AT4G24110/AT4G24570/AT4G32480/AT5G03380/AT5G19120/AT5G20790/AT5G47910/AT5G54940/AT5G54960/AT5G57560/AT5G64260	36	1048	242	21869	3.10424	1.49377e-09	3.92242e-07	3.70544e-07	*
BaMM	GO:0036294	cellular response to decreased oxygen levels	AT1G01720/AT1G03610/AT1G19250/AT1G27730/AT1G35140/AT1G53840/AT1G61340/AT1G66880/AT1G68670/AT1G69890/AT1G73500/AT1G74940/AT1G76600/AT2G26150/AT2G41430/AT3G02040/AT3G07350/AT3G08720/AT3G10020/AT3G15210/AT3G18290/AT3G25250/AT3G55980/AT3G56880/AT4G01250/AT4G24110/AT4G24570/AT4G32480/AT5G03380/AT5G19120/AT5G20790/AT5G47910/AT5G54940/AT5G54960/AT5G57560/AT5G64260	36	1048	244	21869	3.07879	1.87576e-09	3.92242e-07	3.70544e-07	*
BaMM	GO:0071453	cellular response to oxygen levels	AT1G01720/AT1G03610/AT1G19250/AT1G27730/AT1G35140/AT1G53840/AT1G61340/AT1G66880/AT1G68670/AT1G69890/AT1G73500/AT1G74940/AT1G76600/AT2G26150/AT2G41430/AT3G02040/AT3G07350/AT3G08720/AT3G10020/AT3G15210/AT3G18290/AT3G25250/AT3G55980/AT3G56880/AT4G01250/AT4G24110/AT4G24570/AT4G32480/AT5G03380/AT5G19120/AT5G20790/AT5G47910/AT5G54940/AT5G54960/AT5G57560/AT5G64260	36	1048	244	21869	3.07879	1.87576e-09	3.92242e-07	3.70544e-07	*
BaMM	GO:0001666	response to hypoxia	AT1G01720/AT1G03610/AT1G19250/AT1G27730/AT1G35140/AT1G53840/AT1G61340/AT1G66880/AT1G68670/AT1G69890/AT1G73500/AT1G74940/AT1G76600/AT2G26150/AT2G41430/AT3G02040/AT3G07350/AT3G08720/AT3G10020/AT3G15210/AT3G18290/AT3G25250/AT3G55980/AT3G56880/AT4G01250/AT4G24110/AT4G24570/AT4G32480/AT5G03380/AT5G19120/AT5G20790/AT5G47910/AT5G54940/AT5G54960/AT5G57560/AT5G64260	36	1048	268	21869	2.80308	2.34477e-08	4.41287e-06	4.16876e-06	*
BaMM	GO:0071396	cellular response to lipid	AT1G01720/AT1G12240/AT1G17380/AT1G18720/AT1G19180/AT1G28480/AT1G30135/AT1G32640/AT1G66600/AT1G69260/AT1G69270/AT1G69935/AT1G70700/AT1G72450/AT1G74950/AT1G78700/AT2G18790/AT2G30020/AT2G34600/AT2G38240/AT2G41070/AT2G41940/AT3G15210/AT3G15500/AT3G17860/AT3G22275/AT3G27810/AT3G50660/AT3G54030/AT3G55530/AT3G55970/AT3G63010/AT3G63060/AT4G18890/AT4G27920/AT4G28910/AT4G38740/AT4G39400/AT5G05440/AT5G08130…	52	1048	476	21869	2.27963	2.81028e-08	4.80814e-06	4.54217e-06	*
BaMM	GO:0036293	response to decreased oxygen levels	AT1G01720/AT1G03610/AT1G19250/AT1G27730/AT1G35140/AT1G53840/AT1G61340/AT1G66880/AT1G68670/AT1G69890/AT1G73500/AT1G74940/AT1G76600/AT2G26150/AT2G41430/AT3G02040/AT3G07350/AT3G08720/AT3G10020/AT3G15210/AT3G18290/AT3G25250/AT3G55980/AT3G56880/AT4G01250/AT4G24110/AT4G24570/AT4G32480/AT5G03380/AT5G19120/AT5G20790/AT5G47910/AT5G54940/AT5G54960/AT5G57560/AT5G64260	36	1048	272	21869	2.76186	3.45231e-08	5.41437e-06	5.11487e-06	*
BaMM	GO:0070482	response to oxygen levels	AT1G01720/AT1G03610/AT1G19250/AT1G27730/AT1G35140/AT1G53840/AT1G61340/AT1G66880/AT1G68670/AT1G69890/AT1G73500/AT1G74940/AT1G76600/AT2G26150/AT2G41430/AT3G02040/AT3G07350/AT3G08720/AT3G10020/AT3G15210/AT3G18290/AT3G25250/AT3G55980/AT3G56880/AT4G01250/AT4G24110/AT4G24570/AT4G32480/AT5G03380/AT5G19120/AT5G20790/AT5G47910/AT5G54940/AT5G54960/AT5G57560/AT5G64260	36	1048	273	21869	2.75174	3.79753e-08	5.49766e-06	5.19355e-06	*
BaMM	GO:2000022	regulation of jasmonic acid mediated signaling pathway	AT1G17380/AT1G19180/AT1G30135/AT1G70700/AT1G72450/AT1G74950/AT2G34600/AT2G38240/AT3G17860/AT3G22275/AT3G55970/AT5G13220/AT5G67300	13	1048	42	21869	6.45895	4.55176e-08	6.11887e-06	5.78039e-06	*
BaMM	GO:0009695	jasmonic acid biosynthetic process	AT1G13280/AT1G17420/AT1G20510/AT2G06050/AT2G44810/AT3G25760/AT3G25770/AT3G25780/AT5G42650/AT5G63980	10	1048	32	21869	6.52105	1.50354e-06	0.000188645	0.000178209	*
BaMM	GO:0031347	regulation of defense response	AT1G02660/AT1G17380/AT1G19180/AT1G19250/AT1G30135/AT1G32640/AT1G44350/AT1G70700/AT1G72450/AT1G74950/AT1G80840/AT2G18790/AT2G22330/AT2G34600/AT2G38240/AT3G15210/AT3G17860/AT3G18690/AT3G22275/AT3G26830/AT3G55970/AT3G57860/AT3G62590/AT4G19030/AT4G39030/AT5G05300/AT5G13220/AT5G14930/AT5G47220/AT5G53060/AT5G67300	31	1048	275	21869	2.35232	9.33402e-06	0.00109791	0.00103718
BaMM	GO:0009694	jasmonic acid metabolic process	AT1G13280/AT1G17420/AT1G20510/AT1G44350/AT2G06050/AT2G44810/AT3G25760/AT3G25770/AT3G25780/AT5G10300/AT5G42650/AT5G63980	12	1048	57	21869	4.39313	1.31978e-05	0.0014473	0.00136724	*
BaMM	GO:0009414	response to water deprivation	AT1G08920/AT1G10370/AT1G12110/AT1G12610/AT1G15360/AT1G27730/AT1G32640/AT1G52890/AT1G54100/AT1G60200/AT1G68010/AT1G69270/AT1G74920/AT2G20880/AT2G20890/AT2G38750/AT2G38760/AT2G41070/AT2G41430/AT2G45960/AT2G47780/AT3G05640/AT3G05700/AT3G15500/AT3G23250/AT3G25760/AT3G26830/AT3G46620/AT3G55530/AT3G56880/AT3G63060/AT4G38680/AT5G08520/AT5G13750/AT5G15960/AT5G15970/AT5G59220/AT5G59550/AT5G63980/AT5G67300	40	1048	406	21869	2.0559	1.38424e-05	0.0014473	0.00136724	*
BaMM	GO:0080134	regulation of response to stress	AT1G02660/AT1G10370/AT1G17380/AT1G19180/AT1G19250/AT1G30135/AT1G32640/AT1G44350/AT1G70700/AT1G72450/AT1G74950/AT1G80840/AT2G18790/AT2G20880/AT2G20890/AT2G22330/AT2G34600/AT2G38240/AT2G47780/AT3G14990/AT3G15210/AT3G17860/AT3G18690/AT3G22275/AT3G26830/AT3G55970/AT3G57860/AT3G62590/AT4G19030/AT4G24560/AT4G25520/AT4G37260/AT4G39030/AT5G05300/AT5G08520/AT5G13220/AT5G14930/AT5G47220/AT5G53060/AT5G67300	40	1048	408	21869	2.04582	1.55221e-05	0.0015375	0.00145245
BaMM	GO:0042430	indole-containing compound metabolic process	AT1G25220/AT1G32640/AT1G69370/AT1G73500/AT1G75500/AT2G04400/AT2G20610/AT2G22330/AT3G26830/AT4G23100/AT4G34410/AT5G05590/AT5G27520/AT5G57890	14	1048	79	21869	3.69801	2.08579e-05	0.00195147	0.00184352	*
BaMM	GO:0006568	tryptophan metabolic process	AT1G25220/AT1G32640/AT1G69370/AT1G75500/AT2G04400/AT2G22330/AT4G34410/AT5G05590/AT5G57890	9	1048	34	21869	5.52371	2.2812e-05	0.00195147	0.00184352	*
BaMM	GO:0006586	indolalkylamine metabolic process	AT1G25220/AT1G32640/AT1G69370/AT1G75500/AT2G04400/AT2G22330/AT4G34410/AT5G05590/AT5G57890	9	1048	34	21869	5.52371	2.2812e-05	0.00195147	0.00184352	*
BaMM	GO:0009415	response to water	AT1G08920/AT1G10370/AT1G12110/AT1G12610/AT1G15360/AT1G27730/AT1G32640/AT1G52890/AT1G54100/AT1G60200/AT1G68010/AT1G69270/AT1G74920/AT2G20880/AT2G20890/AT2G38750/AT2G38760/AT2G41070/AT2G41430/AT2G45960/AT2G47780/AT3G05640/AT3G05700/AT3G15500/AT3G23250/AT3G25760/AT3G26830/AT3G46620/AT3G55530/AT3G56880/AT3G63060/AT4G38680/AT5G08520/AT5G13750/AT5G15960/AT5G15970/AT5G59220/AT5G59550/AT5G63980/AT5G67300	40	1048	416	21869	2.00648	2.42863e-05	0.00198725	0.00187732	*
BaMM	GO:0002213	defense response to insect	AT1G02660/AT1G32640/AT1G74930/AT2G38240/AT3G28740/AT3G55970/AT3G62590/AT4G23100/AT5G24770	9	1048	35	21869	5.36589	2.94096e-05	0.00230621	0.00217864	*
BaMM	GO:0009966	regulation of signal transduction	AT1G01720/AT1G17380/AT1G19180/AT1G19570/AT1G30135/AT1G69935/AT1G70700/AT1G72450/AT1G74950/AT1G75500/AT1G78570/AT1G80440/AT2G34600/AT2G38240/AT2G40940/AT2G41940/AT2G43010/AT3G15210/AT3G17860/AT3G22275/AT3G55530/AT3G55970/AT3G63010/AT4G24580/AT4G34410/AT4G37260/AT4G39403/AT5G08520/AT5G10720/AT5G13220/AT5G17490/AT5G59220/AT5G63980/AT5G67300	34	1048	334	21869	2.12422	3.08659e-05	0.00232358	0.00219505	*
BaMM	GO:0042435	indole-containing compound biosynthetic process	AT1G25220/AT1G32640/AT1G69370/AT1G73500/AT2G04400/AT2G20610/AT2G22330/AT3G26830/AT4G23100/AT5G05590/AT5G57890	11	1048	54	21869	4.25076	4.17053e-05	0.00301882	0.00285183	*
BaMM	GO:0023051	regulation of signaling	AT1G01720/AT1G17380/AT1G19180/AT1G19570/AT1G30135/AT1G69935/AT1G70700/AT1G72450/AT1G74950/AT1G75500/AT1G78570/AT1G80440/AT2G34600/AT2G38240/AT2G40940/AT2G41940/AT2G43010/AT3G15210/AT3G17860/AT3G22275/AT3G55530/AT3G55970/AT3G63010/AT4G24580/AT4G34410/AT4G37260/AT4G39403/AT5G08520/AT5G10720/AT5G13220/AT5G17490/AT5G59220/AT5G63980/AT5G67300	34	1048	340	21869	2.08674	4.43167e-05	0.00308904	0.00291817	*
BaMM	GO:0010646	regulation of cell communication	AT1G01720/AT1G17380/AT1G19180/AT1G19570/AT1G30135/AT1G69935/AT1G70700/AT1G72450/AT1G74950/AT1G75500/AT1G78570/AT1G80440/AT2G34600/AT2G38240/AT2G40940/AT2G41940/AT2G43010/AT3G15210/AT3G17860/AT3G22275/AT3G55530/AT3G55970/AT3G63010/AT4G24580/AT4G34410/AT4G37260/AT4G39403/AT5G08520/AT5G10720/AT5G13220/AT5G17490/AT5G59220/AT5G63980/AT5G67300	34	1048	344	21869	2.06247	5.6037e-05	0.00376649	0.00355814	*
BaMM	GO:0001101	response to acid chemical	AT1G08920/AT1G10370/AT1G12110/AT1G12610/AT1G15360/AT1G27730/AT1G32640/AT1G52890/AT1G54100/AT1G60200/AT1G61340/AT1G68010/AT1G69270/AT1G74920/AT2G20880/AT2G20890/AT2G38750/AT2G38760/AT2G41070/AT2G41430/AT2G45960/AT2G47780/AT3G05640/AT3G05700/AT3G15500/AT3G23250/AT3G25760/AT3G26830/AT3G46620/AT3G55530/AT3G56880/AT3G63060/AT4G38680/AT5G08520/AT5G13750/AT5G15960/AT5G15970/AT5G59220/AT5G59550/AT5G63980…	41	1048	448	21869	1.90974	5.97711e-05	0.00387894	0.00366437	*
BaMM	GO:0010017	red or far-red light signaling pathway	AT1G69935/AT2G18790/AT2G24540/AT2G43010/AT2G46340/AT2G46970/AT3G62090/AT4G38740/AT5G15960/AT5G59560	10	1048	54	21869	3.86433	0.000213839	0.0134149	0.0126728
BaMM	GO:0071489	cellular response to red or far red light	AT1G69935/AT2G18790/AT2G24540/AT2G43010/AT2G46340/AT2G46970/AT3G62090/AT4G38740/AT5G15960/AT5G59560	10	1048	56	21869	3.72632	0.000291758	0.0176798	0.0167018
BaMM	GO:0009651	response to salt stress	AT1G08920/AT1G10370/AT1G12610/AT1G27730/AT1G54100/AT1G61340/AT1G69270/AT1G73500/AT1G74920/AT2G20880/AT2G38750/AT2G38760/AT2G39760/AT2G39770/AT2G40950/AT2G45960/AT2G47770/AT3G05700/AT3G08720/AT3G08730/AT3G23250/AT3G44110/AT3G49580/AT3G55530/AT3G56880/AT3G57480/AT3G63060/AT4G24560/AT4G25380/AT4G25520/AT4G29200/AT4G37260/AT5G05300/AT5G07350/AT5G08520/AT5G14920/AT5G17490/AT5G24770/AT5G63980/AT5G67300…	41	1048	483	21869	1.77135	0.000300613	0.0176798	0.0167018
BaMM	GO:0006576	cellular biogenic amine metabolic process	AT1G25220/AT1G32640/AT1G69370/AT1G75500/AT2G04400/AT2G22330/AT2G43020/AT4G34410/AT5G05590/AT5G13700/AT5G57890	11	1048	68	21869	3.3756	0.000362159	0.020654	0.0195115
BaMM	GO:0009620	response to fungus	AT1G17420/AT1G19250/AT1G19570/AT1G19670/AT1G28190/AT1G73500/AT1G76600/AT1G80840/AT2G06050/AT2G20610/AT2G30020/AT2G34930/AT2G38240/AT2G46240/AT3G06490/AT3G10985/AT3G14310/AT3G23820/AT3G25780/AT3G26830/AT3G50450/AT3G51440/AT3G51450/AT3G55970/AT4G23100/AT4G34410/AT5G42650/AT5G47910/AT5G53060/AT5G64810/AT5G65530/AT5G67300	32	1048	353	21869	1.89166	0.000437819	0.0242346	0.022894
BaMM	GO:0072330	monocarboxylic acid biosynthetic process	AT1G13280/AT1G17420/AT1G19250/AT1G20510/AT1G74960/AT2G06050/AT2G20610/AT2G22330/AT2G41070/AT2G44810/AT2G45690/AT3G05020/AT3G06650/AT3G14990/AT3G23820/AT3G24220/AT3G25760/AT3G25770/AT3G25780/AT4G39030/AT5G08520/AT5G16390/AT5G42650/AT5G63980	24	1048	243	21869	2.06097	0.000666302	0.0356268	0.0336561
BaMM	GO:1901615	organic hydroxy compound metabolic process	AT1G05470/AT1G06000/AT1G11840/AT1G20050/AT1G20330/AT1G48430/AT1G76090/AT1G76490/AT1G78570/AT2G18790/AT2G34490/AT2G34500/AT2G38230/AT2G41070/AT3G02580/AT3G14990/AT3G24220/AT3G48780/AT3G48790/AT3G50660/AT4G15440/AT4G18010/AT4G39030/AT4G39540/AT5G08520/AT5G10170/AT5G10300/AT5G16760/AT5G42650/AT5G54390/AT5G63980	31	1048	347	21869	1.86423	0.000681491	0.0356268	0.0336561
BaMM	GO:0016126	sterol biosynthetic process	AT1G20050/AT1G20330/AT1G76090/AT1G76490/AT2G34490/AT2G34500/AT3G02580	7	1048	33	21869	4.42641	0.000812398	0.0413225	0.0390367
SiteGA	GO:0009611	response to wounding	AT1G01720/AT1G17380/AT1G17420/AT1G19180/AT1G20510/AT1G27730/AT1G32640/AT1G32920/AT1G61340/AT1G66760/AT1G72290/AT1G72450/AT1G73080/AT1G73500/AT1G74930/AT1G74950/AT1G78080/AT2G06050/AT2G24850/AT2G42440/AT2G44810/AT2G46970/AT3G14050/AT3G16470/AT3G17860/AT3G22275/AT3G25250/AT3G44260/AT3G53260/AT5G06320/AT5G10300/AT5G42650/AT5G56980/AT5G67480	34	583	243	21869	5.24847	2.52445e-15	3.83464e-12	3.59801e-12	*
SiteGA	GO:0009753	response to jasmonic acid	AT1G17380/AT1G17420/AT1G17440/AT1G19180/AT1G20510/AT1G28480/AT1G32640/AT1G44350/AT1G61340/AT1G72450/AT1G73080/AT1G74950/AT2G24850/AT2G38240/AT3G15210/AT3G15500/AT3G16470/AT3G17860/AT3G22275/AT3G27810/AT4G23100/AT4G28910/AT5G40350/AT5G42650/AT5G56980/AT5G64810/AT5G67300/AT5G67480	28	583	204	21869	5.14859	1.21984e-12	9.26472e-10	8.693e-10	*
SiteGA	GO:0070542	response to fatty acid	AT1G17380/AT1G17420/AT1G17440/AT1G19180/AT1G20510/AT1G28480/AT1G32640/AT1G44350/AT1G61340/AT1G72450/AT1G73080/AT1G74950/AT2G24850/AT2G38240/AT3G15210/AT3G15500/AT3G16470/AT3G17860/AT3G22275/AT3G27810/AT4G23100/AT4G28910/AT5G40350/AT5G42650/AT5G56980/AT5G64810/AT5G67300/AT5G67480	28	583	208	21869	5.04958	1.97796e-12	1.00151e-09	9.39704e-10	*
SiteGA	GO:0071456	cellular response to hypoxia	AT1G01720/AT1G07135/AT1G09070/AT1G27730/AT1G32928/AT1G35140/AT1G54050/AT1G61340/AT1G66180/AT1G68670/AT1G73500/AT1G74940/AT2G26150/AT2G36220/AT2G40000/AT3G02040/AT3G15210/AT3G18290/AT3G25250/AT4G01250/AT4G24570/AT4G27280/AT4G32480/AT5G06320/AT5G19120/AT5G54940/AT5G54960/AT5G57560/AT5G64260	29	583	242	21869	4.49514	1.49738e-11	4.64805e-09	4.36122e-09	*
SiteGA	GO:0036294	cellular response to decreased oxygen levels	AT1G01720/AT1G07135/AT1G09070/AT1G27730/AT1G32928/AT1G35140/AT1G54050/AT1G61340/AT1G66180/AT1G68670/AT1G73500/AT1G74940/AT2G26150/AT2G36220/AT2G40000/AT3G02040/AT3G15210/AT3G18290/AT3G25250/AT4G01250/AT4G24570/AT4G27280/AT4G32480/AT5G06320/AT5G19120/AT5G54940/AT5G54960/AT5G57560/AT5G64260	29	583	244	21869	4.45829	1.83596e-11	4.64805e-09	4.36122e-09	*
SiteGA	GO:0071453	cellular response to oxygen levels	AT1G01720/AT1G07135/AT1G09070/AT1G27730/AT1G32928/AT1G35140/AT1G54050/AT1G61340/AT1G66180/AT1G68670/AT1G73500/AT1G74940/AT2G26150/AT2G36220/AT2G40000/AT3G02040/AT3G15210/AT3G18290/AT3G25250/AT4G01250/AT4G24570/AT4G27280/AT4G32480/AT5G06320/AT5G19120/AT5G54940/AT5G54960/AT5G57560/AT5G64260	29	583	244	21869	4.45829	1.83596e-11	4.64805e-09	4.36122e-09	*
SiteGA	GO:0001666	response to hypoxia	AT1G01720/AT1G07135/AT1G09070/AT1G27730/AT1G32928/AT1G35140/AT1G54050/AT1G61340/AT1G66180/AT1G68670/AT1G73500/AT1G74940/AT2G26150/AT2G36220/AT2G40000/AT3G02040/AT3G15210/AT3G18290/AT3G25250/AT4G01250/AT4G24570/AT4G27280/AT4G32480/AT5G06320/AT5G19120/AT5G54940/AT5G54960/AT5G57560/AT5G64260	29	583	268	21869	4.05904	1.80333e-10	3.91324e-08	3.67175e-08	*
SiteGA	GO:0036293	response to decreased oxygen levels	AT1G01720/AT1G07135/AT1G09070/AT1G27730/AT1G32928/AT1G35140/AT1G54050/AT1G61340/AT1G66180/AT1G68670/AT1G73500/AT1G74940/AT2G26150/AT2G36220/AT2G40000/AT3G02040/AT3G15210/AT3G18290/AT3G25250/AT4G01250/AT4G24570/AT4G27280/AT4G32480/AT5G06320/AT5G19120/AT5G54940/AT5G54960/AT5G57560/AT5G64260	29	583	272	21869	3.99935	2.56952e-10	4.73297e-08	4.4409e-08	*
SiteGA	GO:0070482	response to oxygen levels	AT1G01720/AT1G07135/AT1G09070/AT1G27730/AT1G32928/AT1G35140/AT1G54050/AT1G61340/AT1G66180/AT1G68670/AT1G73500/AT1G74940/AT2G26150/AT2G36220/AT2G40000/AT3G02040/AT3G15210/AT3G18290/AT3G25250/AT4G01250/AT4G24570/AT4G27280/AT4G32480/AT5G06320/AT5G19120/AT5G54940/AT5G54960/AT5G57560/AT5G64260	29	583	273	21869	3.9847	2.80426e-10	4.73297e-08	4.4409e-08	*
SiteGA	GO:0009867	jasmonic acid mediated signaling pathway	AT1G17380/AT1G17440/AT1G19180/AT1G28480/AT1G32640/AT1G72450/AT1G74950/AT2G38240/AT3G15210/AT3G15500/AT3G17860/AT3G22275/AT3G27810/AT4G28910/AT5G40350/AT5G64810/AT5G67300	17	583	107	21869	5.95972	3.46013e-09	5.25594e-07	4.9316e-07	*
SiteGA	GO:0071395	cellular response to jasmonic acid stimulus	AT1G17380/AT1G17440/AT1G19180/AT1G28480/AT1G32640/AT1G72450/AT1G74950/AT2G38240/AT3G15210/AT3G15500/AT3G17860/AT3G22275/AT3G27810/AT4G28910/AT5G40350/AT5G64810/AT5G67300	17	583	111	21869	5.74495	6.15702e-09	8.50229e-07	7.97762e-07	*
SiteGA	GO:0071398	cellular response to fatty acid	AT1G17380/AT1G17440/AT1G19180/AT1G28480/AT1G32640/AT1G72450/AT1G74950/AT2G38240/AT3G15210/AT3G15500/AT3G17860/AT3G22275/AT3G27810/AT4G28910/AT5G40350/AT5G64810/AT5G67300	17	583	115	21869	5.54513	1.06768e-08	1.3515e-06	1.2681e-06	*
SiteGA	GO:2000022	regulation of jasmonic acid mediated signaling pathway	AT1G17380/AT1G19180/AT1G72450/AT1G74950/AT2G38240/AT3G17860/AT3G22275/AT5G67300	8	583	42	21869	7.14498	1.28995e-05	0.00150725	0.00141424	*
SiteGA	GO:0006568	tryptophan metabolic process	AT1G25220/AT1G32640/AT2G36230/AT2G40000/AT4G34410/AT5G05590/AT5G17990	7	583	34	21869	7.72288	2.65523e-05	0.00268887	0.00252294	*
SiteGA	GO:0006586	indolalkylamine metabolic process	AT1G25220/AT1G32640/AT2G36230/AT2G40000/AT4G34410/AT5G05590/AT5G17990	7	583	34	21869	7.72288	2.65523e-05	0.00268887	0.00252294	*
SiteGA	GO:0002213	defense response to insect	AT1G02660/AT1G32640/AT1G74930/AT2G38240/AT3G44260/AT3G62590/AT4G23100	7	583	35	21869	7.50223	3.24326e-05	0.00300844	0.00282279	*
SiteGA	GO:0071396	cellular response to lipid	AT1G01720/AT1G09950/AT1G17380/AT1G17440/AT1G18720/AT1G19180/AT1G28480/AT1G32640/AT1G69260/AT1G69270/AT1G72450/AT1G74950/AT2G38240/AT2G38310/AT3G15210/AT3G15500/AT3G17860/AT3G22275/AT3G27810/AT3G54030/AT3G55530/AT4G28910/AT4G38740/AT4G39400/AT5G05440/AT5G40350/AT5G59220/AT5G64810/AT5G67300	29	583	476	21869	2.28534	3.53758e-05	0.00300844	0.00282279	*
SiteGA	GO:0009966	regulation of signal transduction	AT1G01720/AT1G09950/AT1G17380/AT1G17440/AT1G19180/AT1G19770/AT1G72450/AT1G74950/AT1G80440/AT2G25490/AT2G38240/AT2G40940/AT3G15210/AT3G17860/AT3G22275/AT3G48430/AT3G55530/AT3G59940/AT4G24580/AT4G34410/AT4G39403/AT5G59220/AT5G67300	23	583	334	21869	2.5831	3.56497e-05	0.00300844	0.00282279	*
SiteGA	GO:0042430	indole-containing compound metabolic process	AT1G25220/AT1G32640/AT1G73500/AT2G20610/AT2G36230/AT2G40000/AT4G23100/AT4G34410/AT5G05590/AT5G17990	10	583	79	21869	4.74825	4.63287e-05	0.00356523	0.00334522	*
SiteGA	GO:0023051	regulation of signaling	AT1G01720/AT1G09950/AT1G17380/AT1G17440/AT1G19180/AT1G19770/AT1G72450/AT1G74950/AT1G80440/AT2G25490/AT2G38240/AT2G40940/AT3G15210/AT3G17860/AT3G22275/AT3G48430/AT3G55530/AT3G59940/AT4G24580/AT4G34410/AT4G39403/AT5G59220/AT5G67300	23	583	340	21869	2.53752	4.69418e-05	0.00356523	0.00334522	*
SiteGA	GO:0010646	regulation of cell communication	AT1G01720/AT1G09950/AT1G17380/AT1G17440/AT1G19180/AT1G19770/AT1G72450/AT1G74950/AT1G80440/AT2G25490/AT2G38240/AT2G40940/AT3G15210/AT3G17860/AT3G22275/AT3G48430/AT3G55530/AT3G59940/AT4G24580/AT4G34410/AT4G39403/AT5G59220/AT5G67300	23	583	344	21869	2.50801	5.61543e-05	0.00406183	0.00381117	*
SiteGA	GO:0042435	indole-containing compound biosynthetic process	AT1G25220/AT1G32640/AT1G73500/AT2G20610/AT2G36230/AT4G23100/AT5G05590/AT5G17990	8	583	54	21869	5.55721	8.5883e-05	0.00592983	0.0055639	*
SiteGA	GO:0010104	regulation of ethylene-activated signaling pathway	AT1G17440/AT2G25490/AT2G40940/AT3G15210/AT3G48430/AT4G39403	6	583	29	21869	7.76093	9.85025e-05	0.00623439	0.00584967
SiteGA	GO:0070297	regulation of phosphorelay signal transduction system	AT1G17440/AT2G25490/AT2G40940/AT3G15210/AT3G48430/AT4G39403	6	583	29	21869	7.76093	9.85025e-05	0.00623439	0.00584967
SiteGA	GO:0009694	jasmonic acid metabolic process	AT1G17420/AT1G20510/AT1G44350/AT2G06050/AT2G44810/AT3G25760/AT5G10300/AT5G42650	8	583	57	21869	5.26472	0.000127173	0.00772705	0.00725022	*
SiteGA	GO:0009968	negative regulation of signal transduction	AT1G01720/AT1G09950/AT1G19770/AT1G80440/AT2G25490/AT2G40940/AT3G15210/AT3G59940/AT4G24580/AT4G39403/AT5G59220	11	583	110	21869	3.75111	0.00017287	0.00987818	0.0092686
SiteGA	GO:0009695	jasmonic acid biosynthetic process	AT1G17420/AT1G20510/AT2G06050/AT2G44810/AT3G25760/AT5G42650	6	583	32	21869	7.03334	0.000175583	0.00987818	0.0092686	*
SiteGA	GO:0010648	negative regulation of cell communication	AT1G01720/AT1G09950/AT1G19770/AT1G80440/AT2G25490/AT2G40940/AT3G15210/AT3G59940/AT4G24580/AT4G39403/AT5G59220	11	583	114	21869	3.6195	0.00023714	0.0124213	0.0116547
SiteGA	GO:0023057	negative regulation of signaling	AT1G01720/AT1G09950/AT1G19770/AT1G80440/AT2G25490/AT2G40940/AT3G15210/AT3G59940/AT4G24580/AT4G39403/AT5G59220	11	583	114	21869	3.6195	0.00023714	0.0124213	0.0116547
SiteGA	GO:0009414	response to water deprivation	AT1G15360/AT1G27730/AT1G32640/AT1G52890/AT1G68010/AT1G69270/AT1G74920/AT1G78080/AT2G39800/AT2G47780/AT3G05640/AT3G15500/AT3G25760/AT3G46620/AT3G55530/AT4G38680/AT4G39090/AT5G13750/AT5G15960/AT5G15970/AT5G52440/AT5G59220/AT5G59550/AT5G67300	24	583	406	21869	2.21741	0.000256682	0.0129967	0.0121946	*
SiteGA	GO:0009415	response to water	AT1G15360/AT1G27730/AT1G32640/AT1G52890/AT1G68010/AT1G69270/AT1G74920/AT1G78080/AT2G39800/AT2G47780/AT3G05640/AT3G15500/AT3G25760/AT3G46620/AT3G55530/AT4G38680/AT4G39090/AT5G13750/AT5G15960/AT5G15970/AT5G52440/AT5G59220/AT5G59550/AT5G67300	24	583	416	21869	2.1641	0.000365742	0.0170069	0.0159575	*
SiteGA	GO:0009269	response to desiccation	AT1G32640/AT2G39800/AT3G25760/AT4G38680/AT4G39090	5	583	24	21869	7.81482	0.000369473	0.0170069	0.0159575
SiteGA	GO:1902532	negative regulation of intracellular signal transduction	AT2G25490/AT2G40940/AT3G15210/AT4G24580/AT4G39403	5	583	24	21869	7.81482	0.000369473	0.0170069	0.0159575
SiteGA	GO:1902531	regulation of intracellular signal transduction	AT1G17440/AT2G25490/AT2G40940/AT3G15210/AT3G48430/AT4G24580/AT4G39403	7	583	51	21869	5.14859	0.000386351	0.0172608	0.0161956
SiteGA	GO:0009873	ethylene-activated signaling pathway	AT1G15360/AT1G17440/AT1G73500/AT1G78080/AT2G25490/AT2G40940/AT3G15210/AT3G48430/AT4G39403	9	583	84	21869	4.01905	0.000398083	0.0172768	0.0162107
SiteGA	GO:0001101	response to acid chemical	AT1G15360/AT1G27730/AT1G32640/AT1G52890/AT1G61340/AT1G68010/AT1G69270/AT1G74920/AT1G78080/AT2G39800/AT2G47780/AT3G05640/AT3G15500/AT3G25760/AT3G46620/AT3G55530/AT4G38680/AT4G39090/AT5G13750/AT5G15960/AT5G15970/AT5G52440/AT5G59220/AT5G59550/AT5G67300	25	583	448	21869	2.09326	0.000455359	0.0192136	0.0180279	*
SiteGA	GO:0071368	cellular response to cytokinin stimulus	AT1G17440/AT1G19200/AT1G19770/AT1G78080/AT1G80440/AT2G47430/AT3G59940/AT4G39403	8	583	72	21869	4.16791	0.000649814	0.0266775	0.0250312
SiteGA	GO:0071369	cellular response to ethylene stimulus	AT1G15360/AT1G17440/AT1G73500/AT1G78080/AT2G25490/AT2G40940/AT3G15210/AT3G48430/AT4G39403	9	583	91	21869	3.70989	0.000719184	0.0287484	0.0269744
SiteGA	GO:0000160	phosphorelay signal transduction system	AT1G15360/AT1G17440/AT1G73500/AT1G78080/AT2G25490/AT2G40940/AT2G47430/AT3G15210/AT3G48430/AT4G39403	10	583	114	21869	3.29045	0.000954647	0.0371823	0.0348878
SiteGA	GO:0009409	response to cold	AT1G18740/AT1G20823/AT1G27730/AT1G69270/AT1G74960/AT1G78080/AT2G17870/AT2G40970/AT3G03050/AT3G22370/AT4G00650/AT4G10030/AT4G25380/AT4G38680/AT5G01600/AT5G15960/AT5G15970/AT5G50950/AT5G52440/AT5G57560/AT5G64220/AT5G67320	22	583	400	21869	2.06311	0.00117943	0.0446179	0.0418645
SiteGA	GO:0009072	aromatic amino acid family metabolic process	AT1G25220/AT1G32640/AT2G36230/AT2G40000/AT3G53260/AT4G34410/AT5G05590/AT5G17990	8	583	79	21869	3.7986	0.0012043	0.0446179	0.0418645
SiteGA	GO:0010105	negative regulation of ethylene-activated signaling pathway	AT2G25490/AT2G40940/AT3G15210/AT4G39403	4	583	19	21869	7.89708	0.00140853	0.0497572	0.0466867
SiteGA	GO:0070298	negative regulation of phosphorelay signal transduction system	AT2G25490/AT2G40940/AT3G15210/AT4G39403	4	583	19	21869	7.89708	0.00140853	0.0497572	0.0466867
Peaks	GO:0009611	response to wounding	AT1G01720/AT1G17380/AT1G17420/AT1G19180/AT1G20510/AT1G27730/AT1G30135/AT1G32640/AT1G32920/AT1G51400/AT1G51760/AT1G53830/AT1G61340/AT1G66760/AT1G70700/AT1G72290/AT1G72450/AT1G73080/AT1G73500/AT1G74100/AT1G74930/AT1G74950/AT1G78080/AT1G80840/AT2G02860/AT2G06050/AT2G22330/AT2G24850/AT2G27690/AT2G28900/AT2G30020/AT2G32700/AT2G34600/AT2G42430/AT2G42440/AT2G44810/AT2G46510/AT2G46970/AT3G14050/AT3G16470…	69	1497	243	21869	4.14811	4.57035e-25	9.41035e-22	8.76064e-22	*
Peaks	GO:0009753	response to jasmonic acid	AT1G17380/AT1G17420/AT1G17440/AT1G19180/AT1G19570/AT1G20510/AT1G21910/AT1G28290/AT1G28480/AT1G30135/AT1G32640/AT1G44350/AT1G61340/AT1G70700/AT1G72450/AT1G73080/AT1G74100/AT1G74950/AT2G18790/AT2G24850/AT2G28900/AT2G34600/AT2G38240/AT2G39770/AT3G05420/AT3G15210/AT3G15500/AT3G16470/AT3G17860/AT3G22160/AT3G22275/AT3G27810/AT3G44860/AT3G45140/AT3G50660/AT3G51440/AT3G51450/AT3G55970/AT4G23100/AT4G28910…	58	1497	204	21869	4.15341	2.64324e-21	2.72122e-18	2.53334e-18	*
Peaks	GO:0070542	response to fatty acid	AT1G17380/AT1G17420/AT1G17440/AT1G19180/AT1G19570/AT1G20510/AT1G21910/AT1G28290/AT1G28480/AT1G30135/AT1G32640/AT1G44350/AT1G61340/AT1G70700/AT1G72450/AT1G73080/AT1G74100/AT1G74950/AT2G18790/AT2G24850/AT2G28900/AT2G34600/AT2G38240/AT2G39770/AT3G05420/AT3G15210/AT3G15500/AT3G16470/AT3G17860/AT3G22160/AT3G22275/AT3G27810/AT3G44860/AT3G45140/AT3G50660/AT3G51440/AT3G51450/AT3G55970/AT4G23100/AT4G28910…	58	1497	208	21869	4.07354	7.55219e-21	5.18332e-18	4.82545e-18	*
Peaks	GO:0036294	cellular response to decreased oxygen levels	AT1G01720/AT1G03610/AT1G07135/AT1G09070/AT1G19250/AT1G27730/AT1G32928/AT1G35140/AT1G53840/AT1G54050/AT1G61340/AT1G66180/AT1G66880/AT1G68670/AT1G69890/AT1G73500/AT1G74940/AT1G76600/AT2G26150/AT2G36220/AT2G40000/AT2G41430/AT3G02040/AT3G07350/AT3G08720/AT3G10020/AT3G15210/AT3G18290/AT3G25250/AT3G55980/AT3G56880/AT3G62410/AT4G01250/AT4G17230/AT4G24110/AT4G24570/AT4G27280/AT4G27657/AT4G32480/AT4G34150…	52	1497	244	21869	3.1133	1.43834e-13	5.92307e-11	5.51413e-11	*
Peaks	GO:0071453	cellular response to oxygen levels	AT1G01720/AT1G03610/AT1G07135/AT1G09070/AT1G19250/AT1G27730/AT1G32928/AT1G35140/AT1G53840/AT1G54050/AT1G61340/AT1G66180/AT1G66880/AT1G68670/AT1G69890/AT1G73500/AT1G74940/AT1G76600/AT2G26150/AT2G36220/AT2G40000/AT2G41430/AT3G02040/AT3G07350/AT3G08720/AT3G10020/AT3G15210/AT3G18290/AT3G25250/AT3G55980/AT3G56880/AT3G62410/AT4G01250/AT4G17230/AT4G24110/AT4G24570/AT4G27280/AT4G27657/AT4G32480/AT4G34150…	52	1497	244	21869	3.1133	1.43834e-13	5.92307e-11	5.51413e-11	*
Peaks	GO:0071456	cellular response to hypoxia	AT1G01720/AT1G03610/AT1G07135/AT1G09070/AT1G19250/AT1G27730/AT1G32928/AT1G35140/AT1G53840/AT1G54050/AT1G61340/AT1G66180/AT1G66880/AT1G68670/AT1G69890/AT1G73500/AT1G74940/AT1G76600/AT2G26150/AT2G36220/AT2G40000/AT2G41430/AT3G02040/AT3G07350/AT3G08720/AT3G10020/AT3G15210/AT3G18290/AT3G25250/AT3G55980/AT3G56880/AT4G01250/AT4G17230/AT4G24110/AT4G24570/AT4G27280/AT4G27657/AT4G32480/AT4G34150/AT5G03380…	51	1497	242	21869	3.07866	3.90108e-13	1.33872e-10	1.24629e-10	*
Peaks	GO:0009867	jasmonic acid mediated signaling pathway	AT1G17380/AT1G17440/AT1G19180/AT1G28480/AT1G30135/AT1G32640/AT1G70700/AT1G72450/AT1G74950/AT2G18790/AT2G34600/AT2G38240/AT3G15210/AT3G15500/AT3G17860/AT3G22160/AT3G22275/AT3G27810/AT3G50660/AT3G55970/AT4G28910/AT5G05600/AT5G13220/AT5G17490/AT5G20900/AT5G40350/AT5G47220/AT5G53060/AT5G60300/AT5G63970/AT5G64810/AT5G67300	32	1497	107	21869	4.36891	4.81493e-13	1.41628e-10	1.31849e-10	*
Peaks	GO:0071395	cellular response to jasmonic acid stimulus	AT1G17380/AT1G17440/AT1G19180/AT1G28480/AT1G30135/AT1G32640/AT1G70700/AT1G72450/AT1G74950/AT2G18790/AT2G34600/AT2G38240/AT3G15210/AT3G15500/AT3G17860/AT3G22160/AT3G22275/AT3G27810/AT3G50660/AT3G55970/AT4G28910/AT5G05600/AT5G13220/AT5G17490/AT5G20900/AT5G40350/AT5G47220/AT5G53060/AT5G60300/AT5G63970/AT5G64810/AT5G67300	32	1497	111	21869	4.21147	1.46744e-12	3.77682e-10	3.51606e-10	*
Peaks	GO:0036293	response to decreased oxygen levels	AT1G01720/AT1G03610/AT1G07135/AT1G09070/AT1G19250/AT1G27730/AT1G32928/AT1G35140/AT1G53840/AT1G54050/AT1G61340/AT1G66180/AT1G66880/AT1G68670/AT1G69890/AT1G73500/AT1G74940/AT1G76600/AT2G26150/AT2G32700/AT2G36220/AT2G40000/AT2G41430/AT3G02040/AT3G07350/AT3G08720/AT3G10020/AT3G15210/AT3G18290/AT3G25250/AT3G55980/AT3G56880/AT3G62410/AT4G01250/AT4G17230/AT4G24110/AT4G24570/AT4G27280/AT4G27657/AT4G32480…	53	1497	272	21869	2.84652	3.48996e-12	7.90148e-10	7.35595e-10	*
Peaks	GO:0070482	response to oxygen levels	AT1G01720/AT1G03610/AT1G07135/AT1G09070/AT1G19250/AT1G27730/AT1G32928/AT1G35140/AT1G53840/AT1G54050/AT1G61340/AT1G66180/AT1G66880/AT1G68670/AT1G69890/AT1G73500/AT1G74940/AT1G76600/AT2G26150/AT2G32700/AT2G36220/AT2G40000/AT2G41430/AT3G02040/AT3G07350/AT3G08720/AT3G10020/AT3G15210/AT3G18290/AT3G25250/AT3G55980/AT3G56880/AT3G62410/AT4G01250/AT4G17230/AT4G24110/AT4G24570/AT4G27280/AT4G27657/AT4G32480…	53	1497	273	21869	2.83609	4.04864e-12	7.90148e-10	7.35595e-10	*
Peaks	GO:0071398	cellular response to fatty acid	AT1G17380/AT1G17440/AT1G19180/AT1G28480/AT1G30135/AT1G32640/AT1G70700/AT1G72450/AT1G74950/AT2G18790/AT2G34600/AT2G38240/AT3G15210/AT3G15500/AT3G17860/AT3G22160/AT3G22275/AT3G27810/AT3G50660/AT3G55970/AT4G28910/AT5G05600/AT5G13220/AT5G17490/AT5G20900/AT5G40350/AT5G47220/AT5G53060/AT5G60300/AT5G63970/AT5G64810/AT5G67300	32	1497	115	21869	4.06499	4.22129e-12	7.90148e-10	7.35595e-10	*
Peaks	GO:0001666	response to hypoxia	AT1G01720/AT1G03610/AT1G07135/AT1G09070/AT1G19250/AT1G27730/AT1G32928/AT1G35140/AT1G53840/AT1G54050/AT1G61340/AT1G66180/AT1G66880/AT1G68670/AT1G69890/AT1G73500/AT1G74940/AT1G76600/AT2G26150/AT2G32700/AT2G36220/AT2G40000/AT2G41430/AT3G02040/AT3G07350/AT3G08720/AT3G10020/AT3G15210/AT3G18290/AT3G25250/AT3G55980/AT3G56880/AT4G01250/AT4G17230/AT4G24110/AT4G24570/AT4G27280/AT4G27657/AT4G32480/AT4G34150…	52	1497	268	21869	2.83449	6.59905e-12	1.13229e-09	1.05411e-09	*
Peaks	GO:2000022	regulation of jasmonic acid mediated signaling pathway	AT1G17380/AT1G19180/AT1G30135/AT1G70700/AT1G72450/AT1G74950/AT2G34600/AT2G38240/AT3G17860/AT3G22160/AT3G22275/AT3G55970/AT5G05600/AT5G13220/AT5G20900/AT5G60300/AT5G67300	17	1497	42	21869	5.91298	7.15547e-10	1.13332e-07	1.05507e-07	*
Peaks	GO:0006568	tryptophan metabolic process	AT1G25220/AT1G32640/AT1G69370/AT1G75500/AT2G04400/AT2G22330/AT2G36230/AT2G40000/AT4G34410/AT5G05590/AT5G17990/AT5G28237/AT5G57890	13	1497	34	21869	5.58562	1.63881e-07	2.24954e-05	2.09422e-05	*
Peaks	GO:0006586	indolalkylamine metabolic process	AT1G25220/AT1G32640/AT1G69370/AT1G75500/AT2G04400/AT2G22330/AT2G36230/AT2G40000/AT4G34410/AT5G05590/AT5G17990/AT5G28237/AT5G57890	13	1497	34	21869	5.58562	1.63881e-07	2.24954e-05	2.09422e-05	*
Peaks	GO:0009620	response to fungus	AT1G17420/AT1G19250/AT1G19570/AT1G19670/AT1G28190/AT1G37130/AT1G45145/AT1G60010/AT1G73500/AT1G76600/AT1G80840/AT2G06050/AT2G20610/AT2G30020/AT2G32680/AT2G32700/AT2G34930/AT2G38240/AT2G39660/AT2G46240/AT3G02260/AT3G06490/AT3G10985/AT3G14310/AT3G23820/AT3G24550/AT3G25780/AT3G26830/AT3G44860/AT3G45140/AT3G50450/AT3G51440/AT3G51450/AT3G55970/AT4G01090/AT4G08870/AT4G15760/AT4G23100/AT4G31800/AT4G34410…	51	1497	353	21869	2.11058	3.34732e-07	4.30758e-05	4.01017e-05
Peaks	GO:0071396	cellular response to lipid	AT1G01720/AT1G09950/AT1G12240/AT1G17380/AT1G17440/AT1G18720/AT1G19180/AT1G28480/AT1G30135/AT1G32130/AT1G32640/AT1G66600/AT1G69260/AT1G69270/AT1G69935/AT1G70700/AT1G72450/AT1G74950/AT1G78700/AT2G18790/AT2G30020/AT2G34600/AT2G38240/AT2G38310/AT2G41070/AT2G41940/AT3G15210/AT3G15500/AT3G17860/AT3G22160/AT3G22275/AT3G27810/AT3G50660/AT3G50750/AT3G54030/AT3G55530/AT3G55970/AT3G63010/AT3G63060/AT4G18890…	63	1497	476	21869	1.93348	3.66151e-07	4.43473e-05	4.12855e-05	*
Peaks	GO:0009651	response to salt stress	AT1G08920/AT1G09950/AT1G10370/AT1G12610/AT1G27730/AT1G50460/AT1G54050/AT1G54100/AT1G61340/AT1G69270/AT1G73500/AT1G74920/AT1G78080/AT2G03760/AT2G20880/AT2G29500/AT2G32700/AT2G38750/AT2G38760/AT2G39760/AT2G39770/AT2G39800/AT2G40950/AT2G45180/AT2G45960/AT2G47770/AT3G05700/AT3G08720/AT3G08730/AT3G14070/AT3G19580/AT3G22200/AT3G23250/AT3G44110/AT3G48680/AT3G49580/AT3G50110/AT3G55270/AT3G55530/AT3G56880…	63	1497	483	21869	1.90546	6.11861e-07	6.99901e-05	6.51578e-05
Peaks	GO:0009072	aromatic amino acid family metabolic process	AT1G25220/AT1G32640/AT1G69370/AT1G75500/AT2G04400/AT2G22330/AT2G27820/AT2G36230/AT2G40000/AT3G53260/AT4G08870/AT4G34410/AT4G39540/AT4G39980/AT5G05590/AT5G17990/AT5G22630/AT5G28237/AT5G57890	19	1497	79	21869	3.51345	1.12127e-06	0.000110072	0.000102472
Peaks	GO:0042430	indole-containing compound metabolic process	AT1G25220/AT1G32640/AT1G69370/AT1G73500/AT1G75500/AT1G76790/AT2G04400/AT2G20610/AT2G22330/AT2G36230/AT2G40000/AT3G26830/AT4G23100/AT4G34410/AT5G05590/AT5G17990/AT5G27520/AT5G28237/AT5G57890	19	1497	79	21869	3.51345	1.12127e-06	0.000110072	0.000102472	*
Peaks	GO:0080134	regulation of response to stress	AT1G02660/AT1G09950/AT1G10370/AT1G17380/AT1G19180/AT1G19250/AT1G28280/AT1G30135/AT1G32640/AT1G44350/AT1G70700/AT1G72450/AT1G74950/AT1G80840/AT2G18790/AT2G20880/AT2G20890/AT2G22330/AT2G32680/AT2G32700/AT2G34600/AT2G38240/AT2G39660/AT2G45180/AT2G47780/AT3G07700/AT3G14990/AT3G15210/AT3G17860/AT3G18690/AT3G22275/AT3G26830/AT3G55970/AT3G57860/AT3G62590/AT4G01090/AT4G19030/AT4G24560/AT4G25520/AT4G31800…	55	1497	408	21869	1.96929	1.12264e-06	0.000110072	0.000102472
Peaks	GO:0031347	regulation of defense response	AT1G02660/AT1G17380/AT1G19180/AT1G19250/AT1G28280/AT1G30135/AT1G32640/AT1G44350/AT1G70700/AT1G72450/AT1G74950/AT1G80840/AT2G18790/AT2G22330/AT2G32680/AT2G34600/AT2G38240/AT2G39660/AT2G45180/AT3G15210/AT3G17860/AT3G18690/AT3G22275/AT3G26830/AT3G55970/AT3G57860/AT3G62590/AT4G01090/AT4G19030/AT4G31800/AT4G39030/AT5G05300/AT5G05600/AT5G13190/AT5G13220/AT5G14930/AT5G20900/AT5G24660/AT5G47220/AT5G53060…	41	1497	275	21869	2.178	2.07112e-06	0.00018906	0.000176007
Peaks	GO:0042435	indole-containing compound biosynthetic process	AT1G25220/AT1G32640/AT1G69370/AT1G73500/AT1G76790/AT2G04400/AT2G20610/AT2G22330/AT2G36230/AT3G26830/AT4G23100/AT5G05590/AT5G17990/AT5G28237/AT5G57890	15	1497	54	21869	4.05793	2.15049e-06	0.00018906	0.000176007	*
Peaks	GO:0014070	response to organic cyclic compound	AT1G19570/AT1G21910/AT1G22070/AT1G28480/AT1G32130/AT1G32640/AT1G61340/AT1G66180/AT1G75750/AT1G78700/AT1G80840/AT2G03760/AT2G04880/AT2G32690/AT2G32700/AT2G40000/AT2G45820/AT3G02570/AT3G44860/AT3G48430/AT3G50660/AT3G50750/AT3G51440/AT3G51450/AT3G54030/AT4G00720/AT4G05320/AT4G08950/AT4G18890/AT4G30270/AT4G31800/AT4G34160/AT4G35890/AT4G38740/AT4G39030/AT4G39400/AT5G06320/AT5G08130/AT5G08520/AT5G17490…	45	1497	315	21869	2.08694	2.20371e-06	0.00018906	0.000176007
Peaks	GO:0009695	jasmonic acid biosynthetic process	AT1G13280/AT1G17420/AT1G20510/AT2G06050/AT2G44810/AT3G25760/AT3G25770/AT3G25780/AT3G45140/AT5G42650/AT5G63980	11	1497	32	21869	5.02169	5.02317e-06	0.000413708	0.000385145	*
Peaks	GO:0009415	response to water	AT1G08920/AT1G10370/AT1G12110/AT1G12610/AT1G15360/AT1G20450/AT1G27730/AT1G32640/AT1G33240/AT1G52890/AT1G54100/AT1G60200/AT1G68010/AT1G69270/AT1G74920/AT1G78080/AT2G20880/AT2G20890/AT2G32700/AT2G38750/AT2G38760/AT2G39800/AT2G41070/AT2G41430/AT2G45960/AT2G47780/AT3G05640/AT3G05700/AT3G15500/AT3G19580/AT3G22380/AT3G23250/AT3G25760/AT3G26830/AT3G45140/AT3G46620/AT3G55530/AT3G56880/AT3G63060/AT3G63520…	53	1497	416	21869	1.86119	9.27473e-06	0.000734487	0.000683776	*
Peaks	GO:0009414	response to water deprivation	AT1G08920/AT1G10370/AT1G12110/AT1G12610/AT1G15360/AT1G20450/AT1G27730/AT1G32640/AT1G33240/AT1G52890/AT1G54100/AT1G60200/AT1G68010/AT1G69270/AT1G74920/AT1G78080/AT2G20880/AT2G20890/AT2G32700/AT2G38750/AT2G38760/AT2G39800/AT2G41070/AT2G41430/AT2G45960/AT2G47780/AT3G05640/AT3G05700/AT3G15500/AT3G19580/AT3G22380/AT3G23250/AT3G25760/AT3G26830/AT3G45140/AT3G46620/AT3G55530/AT3G56880/AT3G63060/AT3G63520…	52	1497	406	21869	1.87105	9.66909e-06	0.000737357	0.000686449	*
Peaks	GO:0009966	regulation of signal transduction	AT1G01720/AT1G09950/AT1G17380/AT1G17440/AT1G19180/AT1G19570/AT1G19770/AT1G30135/AT1G69935/AT1G70700/AT1G72450/AT1G74950/AT1G75500/AT1G78570/AT1G80440/AT2G25490/AT2G34600/AT2G38240/AT2G40940/AT2G41940/AT2G43010/AT3G15210/AT3G17860/AT3G22160/AT3G22275/AT3G48430/AT3G55530/AT3G55970/AT3G59940/AT3G63010/AT4G24580/AT4G34410/AT4G37260/AT4G39403/AT5G05600/AT5G08520/AT5G10720/AT5G13220/AT5G17490/AT5G20900…	45	1497	334	21869	1.96822	1.04634e-05	0.000745624	0.000694144	*
Peaks	GO:0006576	cellular biogenic amine metabolic process	AT1G25220/AT1G32640/AT1G69370/AT1G75500/AT2G04400/AT2G22330/AT2G36230/AT2G40000/AT2G43020/AT4G08870/AT4G34410/AT5G05590/AT5G13700/AT5G17990/AT5G28237/AT5G57890	16	1497	68	21869	3.43731	1.05017e-05	0.000745624	0.000694144
Peaks	GO:0002213	defense response to insect	AT1G02660/AT1G32640/AT1G74930/AT2G38240/AT3G28740/AT3G44260/AT3G55970/AT3G62590/AT4G23100/AT5G05600/AT5G24770	11	1497	35	21869	4.59126	1.34195e-05	0.000921024	0.000857434	*
Peaks	GO:0023051	regulation of signaling	AT1G01720/AT1G09950/AT1G17380/AT1G17440/AT1G19180/AT1G19570/AT1G19770/AT1G30135/AT1G69935/AT1G70700/AT1G72450/AT1G74950/AT1G75500/AT1G78570/AT1G80440/AT2G25490/AT2G34600/AT2G38240/AT2G40940/AT2G41940/AT2G43010/AT3G15210/AT3G17860/AT3G22160/AT3G22275/AT3G48430/AT3G55530/AT3G55970/AT3G59940/AT3G63010/AT4G24580/AT4G34410/AT4G37260/AT4G39403/AT5G05600/AT5G08520/AT5G10720/AT5G13220/AT5G17490/AT5G20900…	45	1497	340	21869	1.93348	1.65135e-05	0.00109682	0.00102109	*
Peaks	GO:0001101	response to acid chemical	AT1G08920/AT1G10370/AT1G12110/AT1G12610/AT1G15360/AT1G20450/AT1G27730/AT1G32640/AT1G33240/AT1G52890/AT1G54100/AT1G60200/AT1G61340/AT1G68010/AT1G69270/AT1G74920/AT1G78080/AT2G20880/AT2G20890/AT2G32700/AT2G38750/AT2G38760/AT2G39800/AT2G41070/AT2G41430/AT2G45960/AT2G47780/AT3G05640/AT3G05700/AT3G15500/AT3G19580/AT3G22380/AT3G23250/AT3G25760/AT3G26830/AT3G45140/AT3G46620/AT3G55270/AT3G55530/AT3G56880…	55	1497	448	21869	1.79346	1.86374e-05	0.0011992	0.0011164	*
Peaks	GO:0009694	jasmonic acid metabolic process	AT1G13280/AT1G17420/AT1G20510/AT1G44350/AT2G06050/AT2G44810/AT3G25760/AT3G25770/AT3G25780/AT3G45140/AT4G16690/AT5G10300/AT5G42650/AT5G63980	14	1497	57	21869	3.58807	2.2028e-05	0.00134356	0.0012508	*
Peaks	GO:0010646	regulation of cell communication	AT1G01720/AT1G09950/AT1G17380/AT1G17440/AT1G19180/AT1G19570/AT1G19770/AT1G30135/AT1G69935/AT1G70700/AT1G72450/AT1G74950/AT1G75500/AT1G78570/AT1G80440/AT2G25490/AT2G34600/AT2G38240/AT2G40940/AT2G41940/AT2G43010/AT3G15210/AT3G17860/AT3G22160/AT3G22275/AT3G48430/AT3G55530/AT3G55970/AT3G59940/AT3G63010/AT4G24580/AT4G34410/AT4G37260/AT4G39403/AT5G05600/AT5G08520/AT5G10720/AT5G13220/AT5G17490/AT5G20900…	45	1497	344	21869	1.911	2.21861e-05	0.00134356	0.0012508	*
Peaks	GO:0046394	carboxylic acid biosynthetic process	AT1G01120/AT1G13280/AT1G17420/AT1G19250/AT1G20510/AT1G25220/AT1G69370/AT1G74960/AT1G79900/AT2G04400/AT2G06050/AT2G18750/AT2G20610/AT2G22330/AT2G26540/AT2G27820/AT2G36230/AT2G39770/AT2G39800/AT2G41070/AT2G44810/AT2G45690/AT3G02870/AT3G03630/AT3G05020/AT3G06650/AT3G14990/AT3G22200/AT3G23820/AT3G24220/AT3G25760/AT3G25770/AT3G25780/AT3G45140/AT3G47340/AT3G53180/AT3G53260/AT3G59760/AT3G59970/AT4G17830…	58	1497	485	21869	1.747	2.42164e-05	0.00142462	0.00132626
Peaks	GO:0044106	cellular amine metabolic process	AT1G25220/AT1G32640/AT1G69370/AT1G75500/AT2G04400/AT2G22330/AT2G36230/AT2G40000/AT2G43020/AT4G08870/AT4G34410/AT5G05590/AT5G13700/AT5G17990/AT5G28237/AT5G57890	16	1497	78	21869	2.99663	6.41894e-05	0.00367128	0.00341781
Peaks	GO:0000162	tryptophan biosynthetic process	AT1G25220/AT1G69370/AT2G04400/AT2G36230/AT5G05590/AT5G17990/AT5G28237/AT5G57890	8	1497	23	21869	5.08123	9.15249e-05	0.00495921	0.00461681
Peaks	GO:0046219	indolalkylamine biosynthetic process	AT1G25220/AT1G69370/AT2G04400/AT2G36230/AT5G05590/AT5G17990/AT5G28237/AT5G57890	8	1497	23	21869	5.08123	9.15249e-05	0.00495921	0.00461681
Peaks	GO:0009409	response to cold	AT1G01120/AT1G12610/AT1G18740/AT1G20450/AT1G20823/AT1G21910/AT1G27730/AT1G50460/AT1G69270/AT1G74960/AT1G78080/AT2G17870/AT2G18790/AT2G22840/AT2G28900/AT2G38750/AT2G38760/AT2G39810/AT2G40970/AT3G02870/AT3G03050/AT3G08720/AT3G08730/AT3G22370/AT3G23250/AT3G25770/AT3G47470/AT3G55280/AT3G62410/AT4G00650/AT4G10030/AT4G25380/AT4G34150/AT4G38680/AT5G01600/AT5G04590/AT5G15960/AT5G15970/AT5G37770/AT5G43170…	48	1497	400	21869	1.75303	0.000108383	0.00572205	0.00532699
Peaks	GO:0009073	aromatic amino acid family biosynthetic process	AT1G25220/AT1G69370/AT2G04400/AT2G27820/AT2G36230/AT4G39540/AT4G39980/AT5G05590/AT5G17990/AT5G22630/AT5G28237/AT5G57890	12	1497	51	21869	3.43731	0.000131576	0.00677288	0.00630526
Peaks	GO:1901605	alpha-amino acid metabolic process	AT1G25220/AT1G32640/AT1G62800/AT1G69370/AT1G75500/AT1G79900/AT2G04400/AT2G22330/AT2G27820/AT2G36230/AT2G39800/AT2G40000/AT3G03630/AT3G22200/AT3G24090/AT3G47340/AT3G53180/AT3G53260/AT3G59760/AT3G59970/AT4G08870/AT4G17830/AT4G33150/AT4G34410/AT5G04120/AT5G05590/AT5G16570/AT5G17990/AT5G22630/AT5G28237/AT5G38710/AT5G55070/AT5G57890	33	1497	246	21869	1.95968	0.00016316	0.00819381	0.00762809
Peaks	GO:0009408	response to heat	AT1G03190/AT1G09080/AT1G12610/AT1G21910/AT1G54050/AT1G78080/AT2G20880/AT2G26150/AT2G29500/AT2G38750/AT2G38760/AT2G39770/AT2G46240/AT3G02990/AT3G08720/AT3G24520/AT3G44110/AT3G47020/AT3G62410/AT4G14690/AT4G17230/AT4G19020/AT4G23100/AT4G25380/AT5G07350/AT5G37770/AT5G47910/AT5G51190/AT5G53060/AT5G57560/AT5G59720/AT5G59820/AT5G61780/AT5G67300	34	1497	257	21869	1.93265	0.000171471	0.00840614	0.00782576
Peaks	GO:0071489	cellular response to red or far red light	AT1G69935/AT1G78080/AT2G18790/AT2G24540/AT2G43010/AT2G46340/AT2G46970/AT3G62090/AT4G14690/AT4G38740/AT5G15960/AT5G59560	12	1497	56	21869	3.1304	0.000336759	0.0161253	0.015012
Peaks	GO:0006284	base-excision repair	AT1G75230/AT1G80420/AT1G80850/AT3G10010/AT3G48425/AT4G36050/AT5G04560/AT5G63960	8	1497	30	21869	3.89561	0.000710458	0.0332462	0.0309508
Peaks	GO:0042742	defense response to bacterium	AT1G19180/AT1G19250/AT1G19670/AT1G22070/AT1G24100/AT1G69370/AT1G69940/AT1G70690/AT1G80460/AT1G80840/AT2G19190/AT2G20890/AT2G22330/AT2G27080/AT2G32680/AT2G39660/AT2G39770/AT2G40000/AT3G04720/AT3G14310/AT3G15210/AT3G23820/AT3G44260/AT3G53380/AT3G57330/AT3G57860/AT4G23100/AT4G25030/AT4G31800/AT4G39030/AT4G39090/AT5G05300/AT5G06320/AT5G14930/AT5G24660/AT5G45410/AT5G47220/AT5G55830/AT5G56980/AT5G59830…	46	1497	416	21869	1.61537	0.00090996	0.0414329	0.0385723
Peaks	GO:0010017	red or far-red light signaling pathway	AT1G69935/AT1G78080/AT2G18790/AT2G24540/AT2G43010/AT2G46340/AT2G46970/AT3G62090/AT4G38740/AT5G15960/AT5G59560	11	1497	54	21869	2.97582	0.000925651	0.0414329	0.0385723
Peaks	GO:0048585	negative regulation of response to stimulus	AT1G01720/AT1G09950/AT1G10370/AT1G19770/AT1G28280/AT1G69935/AT1G80440/AT2G25490/AT2G32700/AT2G38240/AT2G40940/AT2G41940/AT2G46340/AT3G15210/AT3G55970/AT3G59940/AT4G24580/AT4G25520/AT4G27310/AT4G37260/AT4G39030/AT4G39403/AT5G05600/AT5G08520/AT5G10720/AT5G13190/AT5G17490/AT5G20910/AT5G59220/AT5G63980	30	1497	239	21869	1.83371	0.000963888	0.0422265	0.0393111
Peaks	GO:0051172	negative regulation of nitrogen compound metabolic process	AT1G09060/AT1G27730/AT1G28480/AT1G33240/AT1G69260/AT1G72290/AT1G79270/AT1G79280/AT1G80840/AT2G04395/AT2G18790/AT2G25900/AT2G27840/AT2G32700/AT2G36080/AT2G39810/AT2G42870/AT2G42940/AT3G08020/AT3G15210/AT3G17040/AT3G19580/AT3G22270/AT3G29575/AT3G44260/AT3G48430/AT3G52540/AT3G57860/AT4G14990/AT4G25520/AT4G27310/AT4G28910/AT4G39100/AT5G04590/AT5G06250/AT5G06310/AT5G10960/AT5G13080/AT5G43170/AT5G59710…	43	1497	384	21869	1.63585	0.00102311	0.0438873	0.0408572
Peaks	GO:0051259	protein complex oligomerization	AT1G19580/AT1G32640/AT1G35580/AT1G54050/AT2G29500/AT3G10730/AT4G14680/AT5G40260/AT5G48950/AT5G50950/AT5G59720	11	1497	55	21869	2.92171	0.00108658	0.0456584	0.042506

## Sheet: Supplementary Table S6
Supplementary Table S6. The significantly enriched GO terms for the lists of genes respecting the SEP3 peaks, and BSs predicted within peaks by PWM, BaMM, and SiteGA models. The criterion p_adj < 0.05 was used for analysis. The column 'common GO terms' marks GO terms with the significance of enrichment (p_adj < 0.05) for PWM, BaMM and SiteGA motif models simultaneously.
Gene list	ID	Description	geneID	Count, observed	Total, observed	Count, expected	Total, expected	fold	pvalue	p_adj	qvalue	common GO terms
PWM	GO:0009908	flower development	AT1G02065/AT1G13260/AT1G13400/AT1G13710/AT1G14720/AT1G24260/AT1G30490/AT1G32240/AT1G68130/AT1G68480/AT1G69120/AT1G70510/AT2G03710/AT2G22540/AT2G23950/AT2G27550/AT2G31160/AT2G33860/AT2G42830/AT2G45650/AT2G45660/AT3G02000/AT3G12980/AT3G23130/AT3G50330/AT3G54340/AT3G55510/AT3G57130/AT3G57390/AT3G57670/AT3G61150/AT3G61250/AT3G63010/AT3G63530/AT4G18960/AT4G25640/AT4G30520/AT4G31380/AT4G35900/AT4G36920…	55	678	493	21869	3.59845	1.85906e-16	2.98193e-13	2.6653e-13	*
PWM	GO:0048437	floral organ development	AT1G02065/AT1G13400/AT1G13710/AT1G14720/AT1G24260/AT1G30490/AT1G32240/AT1G68130/AT1G68480/AT1G70510/AT2G03710/AT2G23950/AT2G31160/AT2G42830/AT2G45650/AT3G02000/AT3G23130/AT3G50330/AT3G54340/AT3G57130/AT3G61150/AT3G63010/AT3G63530/AT4G18960/AT4G25640/AT4G30520/AT4G36920/AT4G39400/AT5G06070/AT5G07280/AT5G09805/AT5G13790/AT5G23260/AT5G42080/AT5G43270/AT5G62165/AT5G62230	37	678	259	21869	4.60788	8.65928e-15	6.94474e-12	6.20733e-12	*
PWM	GO:0090698	post-embryonic plant morphogenesis	AT1G07090/AT1G13290/AT1G24260/AT1G25220/AT1G34245/AT1G68130/AT1G68480/AT1G70510/AT2G21050/AT2G30370/AT2G31160/AT2G46410/AT3G02000/AT3G02260/AT3G04510/AT3G13898/AT3G23130/AT3G50330/AT3G54340/AT3G57130/AT3G63010/AT4G35910/AT4G36920/AT4G39400/AT5G07280/AT5G10310/AT5G28490/AT5G57390/AT5G62230	29	678	205	21869	4.56293	9.05706e-12	4.84251e-09	4.32832e-09	*
PWM	GO:0048438	floral whorl development	AT1G02065/AT1G13400/AT1G14720/AT1G24260/AT1G30490/AT1G32240/AT1G68480/AT1G70510/AT2G03710/AT2G22540/AT2G23950/AT2G31160/AT2G42830/AT3G02000/AT3G50330/AT3G57670/AT4G18960/AT4G25640/AT4G30520/AT4G36920/AT4G39400/AT5G06070/AT5G07280/AT5G23260/AT5G42080/AT5G43270/AT5G62230	27	678	205	21869	4.24824	2.4826e-10	9.95524e-08	8.89817e-08	*
PWM	GO:1905393	plant organ formation	AT1G13710/AT1G24260/AT1G25220/AT1G55580/AT1G58340/AT1G68480/AT1G70510/AT2G27990/AT2G34925/AT3G02000/AT3G02260/AT3G23130/AT3G50330/AT3G54340/AT3G57130/AT4G35910/AT4G36920/AT4G39400/AT5G07280/AT5G53950/AT5G57390	21	678	129	21869	5.25084	4.89431e-10	1.5701e-07	1.40338e-07	*
PWM	GO:0048449	floral organ formation	AT1G24260/AT1G68480/AT1G70510/AT3G02000/AT3G23130/AT3G50330/AT3G54340/AT4G36920/AT4G39400/AT5G07280	10	678	25	21869	12.9021	1.64833e-09	3.97387e-07	3.55192e-07	*
PWM	GO:0048507	meristem development	AT1G03170/AT1G13710/AT1G23380/AT1G30490/AT1G55580/AT1G69120/AT1G69320/AT1G71696/AT1G76420/AT2G03710/AT2G22540/AT2G23950/AT2G27990/AT2G31160/AT2G33860/AT2G33880/AT2G34925/AT2G45660/AT3G03773/AT3G06500/AT3G13300/AT3G47710/AT3G55510/AT3G57130/AT4G22950/AT4G30520/AT4G36920/AT4G40060/AT5G03840/AT5G06070/AT5G06250/AT5G43270/AT5G53950	33	678	320	21869	3.32631	1.73423e-09	3.97387e-07	3.55192e-07	*
PWM	GO:0010016	shoot system morphogenesis	AT1G13290/AT1G13710/AT1G30490/AT1G34245/AT1G47485/AT1G55580/AT1G68130/AT1G68480/AT2G21050/AT2G27990/AT2G30370/AT2G34925/AT2G35612/AT2G46410/AT3G02260/AT3G13300/AT3G13898/AT3G57130/AT3G61460/AT4G36870/AT5G06250/AT5G10310/AT5G53950/AT5G62230/AT5G67100	25	678	205	21869	3.93356	5.73522e-09	1.14991e-06	1.02781e-06	*
PWM	GO:0048444	floral organ morphogenesis	AT1G24260/AT1G68130/AT1G68480/AT1G70510/AT3G02000/AT3G23130/AT3G50330/AT3G54340/AT3G63010/AT4G36920/AT4G39400/AT5G07280	12	678	45	21869	8.60138	8.06149e-09	1.43266e-06	1.28054e-06	*
PWM	GO:0048646	anatomical structure formation involved in morphogenesis	AT1G13710/AT1G24260/AT1G25220/AT1G26770/AT1G26780/AT1G55580/AT1G58340/AT1G68480/AT1G70510/AT1G76420/AT2G27990/AT2G31160/AT2G34925/AT2G46410/AT3G02000/AT3G02260/AT3G23130/AT3G50330/AT3G54340/AT3G57130/AT4G35910/AT4G36920/AT4G39400/AT5G07280/AT5G53950/AT5G57390	26	678	225	21869	3.72726	8.93182e-09	1.43266e-06	1.28054e-06	*
PWM	GO:0045893	positive regulation of transcription, DNA-templated	AT1G14760/AT1G18750/AT1G24260/AT1G32640/AT1G34190/AT1G49720/AT1G69120/AT1G73690/AT1G75390/AT2G02080/AT2G03710/AT2G22540/AT2G36270/AT2G36610/AT2G42830/AT2G45650/AT2G45660/AT3G03460/AT3G05700/AT3G12980/AT3G19290/AT3G54340/AT3G54350/AT3G55990/AT3G57130/AT3G57390/AT4G18960/AT4G22950/AT4G25490/AT4G35900/AT4G36240/AT4G40060/AT5G08790/AT5G09740/AT5G13790/AT5G23260/AT5G39760/AT5G42060/AT5G62165	39	678	478	21869	2.6317	4.41576e-08	6.08978e-06	5.44316e-06	*
PWM	GO:1902680	positive regulation of RNA biosynthetic process	AT1G14760/AT1G18750/AT1G24260/AT1G32640/AT1G34190/AT1G49720/AT1G69120/AT1G73690/AT1G75390/AT2G02080/AT2G03710/AT2G22540/AT2G36270/AT2G36610/AT2G42830/AT2G45650/AT2G45660/AT3G03460/AT3G05700/AT3G12980/AT3G19290/AT3G54340/AT3G54350/AT3G55990/AT3G57130/AT3G57390/AT4G18960/AT4G22950/AT4G25490/AT4G35900/AT4G36240/AT4G40060/AT5G08790/AT5G09740/AT5G13790/AT5G23260/AT5G39760/AT5G42060/AT5G62165	39	678	480	21869	2.62073	4.93561e-08	6.08978e-06	5.44316e-06	*
PWM	GO:1903508	positive regulation of nucleic acid-templated transcription	AT1G14760/AT1G18750/AT1G24260/AT1G32640/AT1G34190/AT1G49720/AT1G69120/AT1G73690/AT1G75390/AT2G02080/AT2G03710/AT2G22540/AT2G36270/AT2G36610/AT2G42830/AT2G45650/AT2G45660/AT3G03460/AT3G05700/AT3G12980/AT3G19290/AT3G54340/AT3G54350/AT3G55990/AT3G57130/AT3G57390/AT4G18960/AT4G22950/AT4G25490/AT4G35900/AT4G36240/AT4G40060/AT5G08790/AT5G09740/AT5G13790/AT5G23260/AT5G39760/AT5G42060/AT5G62165	39	678	480	21869	2.62073	4.93561e-08	6.08978e-06	5.44316e-06	*
PWM	GO:0048440	carpel development	AT1G13400/AT1G24260/AT1G30490/AT1G32240/AT1G68480/AT1G70510/AT2G03710/AT2G42830/AT3G50330/AT4G18960/AT4G36920/AT5G23260/AT5G42080/AT5G62230	14	678	82	21869	5.50698	2.08063e-07	2.2394e-05	2.00162e-05	*
PWM	GO:0048366	leaf development	AT1G13260/AT1G13290/AT1G13710/AT1G24590/AT1G31040/AT1G34190/AT1G47485/AT1G68130/AT1G68480/AT2G21050/AT2G35612/AT2G46310/AT3G04060/AT3G13300/AT3G13960/AT3G19290/AT3G54220/AT3G57130/AT3G61460/AT3G63530/AT4G11140/AT4G18960/AT4G30520/AT4G33950/AT4G35890/AT4G36870/AT4G39400/AT5G01600/AT5G05700/AT5G06250/AT5G08790/AT5G53950/AT5G62165/AT5G67100	34	678	410	21869	2.67482	2.22435e-07	2.2394e-05	2.00162e-05	*
PWM	GO:0048467	gynoecium development	AT1G13400/AT1G24260/AT1G30490/AT1G32240/AT1G68480/AT1G70510/AT2G03710/AT2G42830/AT3G50330/AT3G57670/AT4G18960/AT4G36920/AT5G23260/AT5G42080/AT5G62230	15	678	95	21869	5.09292	2.23382e-07	2.2394e-05	2.00162e-05	*
PWM	GO:0071456	cellular response to hypoxia	AT1G13260/AT1G21550/AT1G25560/AT1G76600/AT2G33585/AT2G33590/AT2G40000/AT3G03270/AT3G03280/AT3G07350/AT3G10020/AT3G10040/AT3G13310/AT3G15210/AT3G22550/AT3G30775/AT3G47720/AT3G55980/AT4G17230/AT4G27280/AT5G42050/AT5G47910/AT5G64260/AT5G65207	24	678	242	21869	3.19886	5.88685e-07	5.55441e-05	4.96464e-05	*
PWM	GO:0036294	cellular response to decreased oxygen levels	AT1G13260/AT1G21550/AT1G25560/AT1G76600/AT2G33585/AT2G33590/AT2G40000/AT3G03270/AT3G03280/AT3G07350/AT3G10020/AT3G10040/AT3G13310/AT3G15210/AT3G22550/AT3G30775/AT3G47720/AT3G55980/AT4G17230/AT4G27280/AT5G42050/AT5G47910/AT5G64260/AT5G65207	24	678	244	21869	3.17264	6.83575e-07	5.77081e-05	5.15806e-05	*
PWM	GO:0071453	cellular response to oxygen levels	AT1G13260/AT1G21550/AT1G25560/AT1G76600/AT2G33585/AT2G33590/AT2G40000/AT3G03270/AT3G03280/AT3G07350/AT3G10020/AT3G10040/AT3G13310/AT3G15210/AT3G22550/AT3G30775/AT3G47720/AT3G55980/AT4G17230/AT4G27280/AT5G42050/AT5G47910/AT5G64260/AT5G65207	24	678	244	21869	3.17264	6.83575e-07	5.77081e-05	5.15806e-05	*
PWM	GO:0090697	post-embryonic plant organ morphogenesis	AT1G24260/AT1G25220/AT1G68130/AT1G68480/AT1G70510/AT3G02000/AT3G02260/AT3G23130/AT3G50330/AT3G54340/AT3G63010/AT4G35910/AT4G36920/AT4G39400/AT5G07280/AT5G57390	16	678	120	21869	4.30069	9.49873e-07	7.61798e-05	6.80909e-05	*
PWM	GO:0045944	positive regulation of transcription by RNA polymerase II	AT1G18750/AT1G24260/AT1G69120/AT1G73690/AT2G03710/AT2G22540/AT2G42830/AT2G45650/AT2G45660/AT3G12980/AT3G54340/AT3G54350/AT3G57390/AT4G18960/AT4G22950/AT5G09740/AT5G13790/AT5G23260/AT5G42060/AT5G62165	20	678	182	21869	3.54452	1.02809e-06	7.85264e-05	7.01884e-05	*
PWM	GO:0001666	response to hypoxia	AT1G13260/AT1G21550/AT1G25560/AT1G76600/AT2G33585/AT2G33590/AT2G40000/AT3G03270/AT3G03280/AT3G07350/AT3G10020/AT3G10040/AT3G13310/AT3G14230/AT3G15210/AT3G22550/AT3G30775/AT3G47720/AT3G55980/AT4G17230/AT4G27280/AT5G42050/AT5G47910/AT5G64260/AT5G65207	25	678	268	21869	3.00888	1.07917e-06	7.86816e-05	7.0327e-05	*
PWM	GO:0010093	specification of floral organ identity	AT1G24260/AT1G68480/AT1G70510/AT3G23130/AT3G54340/AT4G36920	6	678	13	21869	14.887	1.23751e-06	8.63029e-05	7.71391e-05	*
PWM	GO:0010073	meristem maintenance	AT1G03170/AT1G13710/AT1G23380/AT1G69120/AT1G69320/AT1G71696/AT2G03710/AT2G22540/AT2G23950/AT2G27990/AT2G31160/AT2G33860/AT2G33880/AT2G45660/AT3G55510/AT3G57130/AT4G30520/AT4G36920/AT5G03840/AT5G06250	20	678	185	21869	3.48704	1.33137e-06	8.89797e-05	7.95317e-05	*
PWM	GO:0036293	response to decreased oxygen levels	AT1G13260/AT1G21550/AT1G25560/AT1G76600/AT2G33585/AT2G33590/AT2G40000/AT3G03270/AT3G03280/AT3G07350/AT3G10020/AT3G10040/AT3G13310/AT3G14230/AT3G15210/AT3G22550/AT3G30775/AT3G47720/AT3G55980/AT4G17230/AT4G27280/AT5G42050/AT5G47910/AT5G64260/AT5G65207	25	678	272	21869	2.96463	1.41607e-06	9.07622e-05	8.11249e-05	*
PWM	GO:0070482	response to oxygen levels	AT1G13260/AT1G21550/AT1G25560/AT1G76600/AT2G33585/AT2G33590/AT2G40000/AT3G03270/AT3G03280/AT3G07350/AT3G10020/AT3G10040/AT3G13310/AT3G14230/AT3G15210/AT3G22550/AT3G30775/AT3G47720/AT3G55980/AT4G17230/AT4G27280/AT5G42050/AT5G47910/AT5G64260/AT5G65207	25	678	273	21869	2.95377	1.51418e-06	9.07622e-05	8.11249e-05	*
PWM	GO:0006357	regulation of transcription by RNA polymerase II	AT1G03290/AT1G05710/AT1G18750/AT1G23380/AT1G24260/AT1G32330/AT1G32640/AT1G69120/AT1G70510/AT1G73690/AT2G03710/AT2G22540/AT2G27990/AT2G35940/AT2G42830/AT2G45650/AT2G45660/AT2G47810/AT3G02000/AT3G05690/AT3G12980/AT3G54340/AT3G54350/AT3G57390/AT4G00450/AT4G01460/AT4G18960/AT4G22950/AT4G36870/AT5G09740/AT5G11060/AT5G13790/AT5G23260/AT5G42060/AT5G47640/AT5G62165	36	678	487	21869	2.38437	1.54929e-06	9.07622e-05	8.11249e-05	*
PWM	GO:0051239	regulation of multicellular organismal process	AT1G13260/AT1G13710/AT1G16060/AT1G18750/AT1G34245/AT1G68480/AT2G19450/AT2G22540/AT2G27550/AT2G30370/AT2G36270/AT2G45650/AT2G45660/AT2G46340/AT3G03450/AT3G06500/AT3G57390/AT3G61250/AT3G63530/AT4G00450/AT4G29140/AT4G31380/AT4G34220/AT4G35900/AT4G39400/AT5G03840/AT5G05700/AT5G08790/AT5G13790/AT5G35770/AT5G41380/AT5G57390/AT5G62165/AT5G66730/AT5G67100	35	678	467	21869	2.41741	1.58438e-06	9.07622e-05	8.11249e-05	*
PWM	GO:0007389	pattern specification process	AT1G10745/AT1G10747/AT1G13290/AT1G14760/AT1G24260/AT1G24590/AT1G30490/AT1G32240/AT1G68480/AT1G70510/AT2G21050/AT2G27990/AT2G31160/AT2G46640/AT3G23130/AT3G54220/AT3G54340/AT3G57130/AT4G00450/AT4G36920/AT5G42080/AT5G57390	22	678	222	21869	3.19646	1.74676e-06	9.66141e-05	8.63554e-05	*
PWM	GO:0090701	specification of plant organ identity	AT1G24260/AT1G68480/AT1G70510/AT3G23130/AT3G54340/AT4G36920	6	678	14	21869	13.8236	2.1088e-06	0.000112751	0.000100778	*
PWM	GO:1905392	plant organ morphogenesis	AT1G13290/AT1G13710/AT1G24260/AT1G24620/AT1G25220/AT1G47485/AT1G58340/AT1G68130/AT1G68480/AT1G69320/AT1G70510/AT1G71696/AT2G21050/AT2G35612/AT2G46410/AT3G02000/AT3G02260/AT3G13300/AT3G23130/AT3G50330/AT3G54340/AT3G57130/AT3G61460/AT3G63010/AT4G29140/AT4G30260/AT4G35910/AT4G36870/AT4G36920/AT4G39400/AT5G06250/AT5G07280/AT5G42080/AT5G57390/AT5G67100	35	678	485	21869	2.32769	3.70049e-06	0.000191471	0.00017114	*
PWM	GO:2000026	regulation of multicellular organismal development	AT1G13260/AT1G16060/AT1G34245/AT1G68480/AT2G19450/AT2G22540/AT2G27550/AT2G30370/AT2G36270/AT2G45650/AT2G45660/AT2G46340/AT3G03450/AT3G06500/AT3G57390/AT3G61250/AT4G31380/AT4G34220/AT4G35900/AT4G39400/AT5G03840/AT5G05700/AT5G08790/AT5G13790/AT5G41380/AT5G57390/AT5G62165/AT5G66730/AT5G67100	29	678	376	21869	2.48777	7.1416e-06	0.000357972	0.000319962	*
PWM	GO:0048580	regulation of post-embryonic development	AT1G13260/AT1G16060/AT1G34245/AT1G68480/AT2G19450/AT2G22540/AT2G27550/AT2G30370/AT2G36270/AT2G45650/AT2G45660/AT2G46340/AT3G03450/AT3G06500/AT3G57390/AT3G61250/AT4G31380/AT4G34220/AT4G35900/AT4G39400/AT5G03840/AT5G05700/AT5G08790/AT5G13790/AT5G41380/AT5G62165/AT5G66730/AT5G67100	28	678	362	21869	2.49487	9.71019e-06	0.000471974	0.000421859	*
PWM	GO:0003002	regionalization	AT1G13290/AT1G14760/AT1G24260/AT1G30490/AT1G32240/AT1G68480/AT1G70510/AT2G21050/AT2G31160/AT2G46640/AT3G23130/AT3G54220/AT3G54340/AT3G57130/AT4G00450/AT4G36920/AT5G42080/AT5G57390	18	678	182	21869	3.19007	1.54257e-05	0.000727728	0.000650457	*
PWM	GO:0090696	post-embryonic plant organ development	AT1G13260/AT1G24260/AT1G25220/AT1G47485/AT1G68130/AT1G68480/AT1G70510/AT2G44900/AT3G02000/AT3G02260/AT3G23130/AT3G50330/AT3G54340/AT3G63010/AT4G35910/AT4G36920/AT4G39400/AT5G07280/AT5G57390	19	678	201	21869	3.049	1.71953e-05	0.000788036	0.000704361	*
PWM	GO:0048831	regulation of shoot system development	AT1G13260/AT1G68480/AT2G22540/AT2G27550/AT2G35612/AT2G45650/AT2G45660/AT3G57390/AT3G61250/AT4G31380/AT4G35900/AT4G39400/AT5G03840/AT5G13790/AT5G41380/AT5G62165/AT5G67100	17	678	172	21869	3.18801	2.66254e-05	0.00118631	0.00106034	*
PWM	GO:0009414	response to water deprivation	AT1G16060/AT1G22810/AT1G32640/AT1G62660/AT1G69310/AT1G78080/AT2G33590/AT2G33860/AT2G36270/AT2G39550/AT2G39800/AT2G45960/AT3G02480/AT3G05700/AT3G14440/AT3G15500/AT3G17410/AT3G19290/AT3G30775/AT3G46620/AT3G63520/AT4G17870/AT4G25480/AT4G25490/AT4G31390/AT4G33950/AT4G34220/AT5G13780/AT5G52440	29	678	406	21869	2.30394	3.00644e-05	0.00130333	0.00116494	*
PWM	GO:0051093	negative regulation of developmental process	AT1G13260/AT1G16060/AT1G34245/AT2G22540/AT2G27550/AT2G30370/AT2G36270/AT2G46340/AT3G03450/AT3G57390/AT3G61150/AT3G63530/AT4G18960/AT5G03840/AT5G13790/AT5G67100	16	678	158	21869	3.26635	3.38746e-05	0.00142986	0.00127804	*
PWM	GO:0048443	stamen development	AT1G02065/AT1G13400/AT1G14720/AT1G68480/AT2G03710/AT2G23950/AT3G02000/AT4G18960/AT4G25640/AT4G30520/AT4G39400/AT5G07280/AT5G43270	13	678	110	21869	3.81197	3.65595e-05	0.00146604	0.00131037	*
PWM	GO:0048466	androecium development	AT1G02065/AT1G13400/AT1G14720/AT1G68480/AT2G03710/AT2G23950/AT3G02000/AT4G18960/AT4G25640/AT4G30520/AT4G39400/AT5G07280/AT5G43270	13	678	110	21869	3.81197	3.65595e-05	0.00146604	0.00131037	*
PWM	GO:0009909	regulation of flower development	AT1G13260/AT1G68480/AT2G22540/AT2G27550/AT2G45650/AT2G45660/AT3G57390/AT3G61250/AT4G31380/AT4G35900/AT4G39400/AT5G03840/AT5G13790/AT5G41380/AT5G62165/AT5G67100	16	678	160	21869	3.22552	3.95258e-05	0.00154633	0.00138213	*
PWM	GO:0009415	response to water	AT1G16060/AT1G22810/AT1G32640/AT1G62660/AT1G69310/AT1G78080/AT2G33590/AT2G33860/AT2G36270/AT2G39550/AT2G39800/AT2G45960/AT3G02480/AT3G05700/AT3G14440/AT3G15500/AT3G17410/AT3G19290/AT3G30775/AT3G46620/AT3G63520/AT4G17870/AT4G25480/AT4G25490/AT4G31390/AT4G33950/AT4G34220/AT5G13780/AT5G52440	29	678	416	21869	2.24856	4.6688e-05	0.00177287	0.00158462	*
PWM	GO:0051241	negative regulation of multicellular organismal process	AT1G13260/AT1G16060/AT1G34245/AT2G22540/AT2G27550/AT2G30370/AT2G36270/AT2G46340/AT3G03450/AT3G57390/AT3G63530/AT5G03840/AT5G13790/AT5G67100	14	678	129	21869	3.50056	4.84251e-05	0.00177287	0.00158462	*
PWM	GO:0048581	negative regulation of post-embryonic development	AT1G13260/AT1G16060/AT1G34245/AT2G22540/AT2G27550/AT2G30370/AT2G36270/AT2G46340/AT3G03450/AT3G57390/AT5G03840/AT5G13790/AT5G67100	13	678	113	21869	3.71077	4.86322e-05	0.00177287	0.00158462	*
PWM	GO:0009965	leaf morphogenesis	AT1G13290/AT1G13710/AT1G47485/AT1G68130/AT1G68480/AT2G21050/AT2G35612/AT3G13300/AT3G57130/AT3G61460/AT4G36870/AT5G06250/AT5G67100	13	678	118	21869	3.55353	7.65111e-05	0.0027272	0.00243762	*
PWM	GO:0048859	formation of anatomical boundary	AT1G26780/AT1G76420/AT2G31160/AT3G23130/AT5G53950	5	678	16	21869	10.0797	9.27644e-05	0.00316583	0.00282968
PWM	GO:0090691	formation of plant organ boundary	AT1G26780/AT1G76420/AT2G31160/AT3G23130/AT5G53950	5	678	16	21869	10.0797	9.27644e-05	0.00316583	0.00282968
PWM	GO:0001708	cell fate specification	AT1G24260/AT1G32240/AT1G68480/AT2G33860/AT2G46410/AT3G54220/AT5G07280	7	678	38	21869	5.94174	0.000145755	0.00487064	0.00435346	*
PWM	GO:0001101	response to acid chemical	AT1G16060/AT1G22810/AT1G32640/AT1G62660/AT1G69310/AT1G78080/AT2G33590/AT2G33860/AT2G36270/AT2G39550/AT2G39800/AT2G45960/AT3G02480/AT3G05700/AT3G14440/AT3G15500/AT3G17410/AT3G19290/AT3G30775/AT3G46620/AT3G63520/AT4G17870/AT4G25480/AT4G25490/AT4G31390/AT4G33950/AT4G34220/AT5G13780/AT5G52440	29	678	448	21869	2.08795	0.000170043	0.0055663	0.00497526	*
PWM	GO:0048653	anther development	AT1G02065/AT1G13400/AT1G68480/AT2G23950/AT3G02000/AT4G25640/AT4G30520/AT4G39400/AT5G07280/AT5G43270	10	678	81	21869	3.98212	0.000198512	0.00636826	0.00569206	*
PWM	GO:0045165	cell fate commitment	AT1G24260/AT1G32240/AT1G47485/AT1G68480/AT1G69320/AT2G33860/AT2G34925/AT2G46410/AT3G54220/AT3G57670/AT5G07280	11	678	98	21869	3.62048	0.000227577	0.00715752	0.00639752	*
PWM	GO:0000038	very long-chain fatty acid metabolic process	AT1G01120/AT1G06080/AT1G67730/AT2G31360/AT2G45670/AT2G46720/AT4G13840	7	678	41	21869	5.50698	0.000239562	0.00738956	0.00660492
PWM	GO:0009651	response to salt stress	AT1G01140/AT1G15100/AT1G16060/AT1G47485/AT1G62660/AT1G69310/AT1G78080/AT2G18250/AT2G19450/AT2G35612/AT2G36270/AT2G39800/AT2G45640/AT2G45960/AT3G02140/AT3G03450/AT3G05700/AT3G14440/AT3G19290/AT3G48680/AT3G60120/AT3G60130/AT3G61140/AT4G21870/AT4G32410/AT4G33950/AT4G37260/AT5G11150/AT5G60920/AT5G67480	30	678	483	21869	2.00343	0.000269094	0.00810931	0.00724825	*
PWM	GO:0010022	meristem determinacy	AT1G69120/AT2G22540/AT2G33860/AT3G55510/AT3G57130/AT5G03840	6	678	30	21869	6.45103	0.000273007	0.00810931	0.00724825
PWM	GO:0015996	chlorophyll catabolic process	AT3G03470/AT3G04060/AT3G19290/AT4G31390/AT5G13800	5	678	20	21869	8.06379	0.000297045	0.00850822	0.0076048
PWM	GO:0042761	very long-chain fatty acid biosynthetic process	AT1G01120/AT1G06080/AT1G67730/AT2G31360/AT4G13840	5	678	20	21869	8.06379	0.000297045	0.00850822	0.0076048
PWM	GO:0051094	positive regulation of developmental process	AT1G13710/AT2G19450/AT2G45650/AT2G45660/AT2G46410/AT3G04060/AT3G19290/AT3G63530/AT4G34220/AT4G35900/AT4G39400/AT5G35770/AT5G57390	13	678	137	21869	3.06071	0.000344087	0.00968273	0.00865459	*
PWM	GO:0006633	fatty acid biosynthetic process	AT1G01120/AT1G06080/AT1G06090/AT1G16060/AT1G67730/AT2G31360/AT2G44620/AT2G46720/AT4G13840/AT4G30950/AT4G33950/AT5G43760/AT5G47630	13	678	138	21869	3.03853	0.000369334	0.010214	0.00912945
PWM	GO:0010014	meristem initiation	AT1G30490/AT1G55580/AT1G76420/AT2G34925/AT3G13300/AT5G53950	6	678	33	21869	5.86457	0.000470576	0.0122026	0.0109069	*
PWM	GO:0010103	stomatal complex morphogenesis	AT1G34245/AT2G30370/AT2G46410/AT3G13898/AT5G10310/AT5G62230	6	678	33	21869	5.86457	0.000470576	0.0122026	0.0109069
PWM	GO:0009637	response to blue light	AT1G09570/AT1G53090/AT2G30520/AT2G43010/AT2G44830/AT2G46340/AT4G31390/AT4G40060/AT5G28490/AT5G39760	10	678	90	21869	3.58391	0.000471316	0.0122026	0.0109069
PWM	GO:0046149	pigment catabolic process	AT3G03470/AT3G04060/AT3G19290/AT4G31390/AT5G13800	5	678	22	21869	7.33072	0.000479278	0.0122026	0.0109069
PWM	GO:0090354	regulation of auxin metabolic process	AT1G25220/AT1G68130/AT2G43010/AT4G28720/AT5G43270	5	678	22	21869	7.33072	0.000479278	0.0122026	0.0109069
PWM	GO:0035670	plant-type ovary development	AT1G24260/AT1G30490/AT1G32240/AT2G42830/AT3G50330/AT4G36920/AT5G23260/AT5G62230	8	678	60	21869	4.30069	0.000505181	0.0126611	0.0113167	*
PWM	GO:0006568	tryptophan metabolic process	AT1G25220/AT1G32640/AT2G40000/AT4G34180/AT4G34410/AT5G17990	6	678	34	21869	5.69209	0.000556588	0.0135268	0.0120905
PWM	GO:0006586	indolalkylamine metabolic process	AT1G25220/AT1G32640/AT2G40000/AT4G34180/AT4G34410/AT5G17990	6	678	34	21869	5.69209	0.000556588	0.0135268	0.0120905
PWM	GO:0009910	negative regulation of flower development	AT1G13260/AT2G22540/AT2G27550/AT3G57390/AT5G03840/AT5G13790/AT5G67100	7	678	49	21869	4.60788	0.000738885	0.0176891	0.0158109
PWM	GO:0009733	response to auxin	AT1G24590/AT1G47485/AT1G56650/AT2G33860/AT2G39550/AT2G43010/AT3G02260/AT3G13300/AT3G51670/AT4G09160/AT4G11280/AT4G27280/AT4G29080/AT4G34410/AT4G34770/AT4G34780/AT4G34790/AT4G34800/AT4G37260/AT5G10990/AT5G13790/AT5G57390/AT5G67480	23	678	358	21869	2.07226	0.000858118	0.0202415	0.0180922
PWM	GO:0006787	porphyrin-containing compound catabolic process	AT3G03470/AT3G04060/AT3G19290/AT4G31390/AT5G13800	5	678	25	21869	6.45103	0.000895399	0.0205174	0.0183389
PWM	GO:0033015	tetrapyrrole catabolic process	AT3G03470/AT3G04060/AT3G19290/AT4G31390/AT5G13800	5	678	25	21869	6.45103	0.000895399	0.0205174	0.0183389
PWM	GO:0010374	stomatal complex development	AT1G32640/AT1G34245/AT2G30370/AT2G46410/AT3G13898/AT3G50070/AT5G10310/AT5G62230	8	678	67	21869	3.85136	0.00106549	0.0237432	0.0212221	*
PWM	GO:0006636	unsaturated fatty acid biosynthetic process	AT1G06080/AT1G06090/AT2G31360/AT4G30950/AT4G33950	5	678	26	21869	6.20292	0.00108058	0.0237432	0.0212221
PWM	GO:0010582	floral meristem determinacy	AT1G69120/AT2G22540/AT2G33860/AT3G55510/AT3G57130	5	678	26	21869	6.20292	0.00108058	0.0237432	0.0212221
PWM	GO:0048532	anatomical structure arrangement	AT1G30490/AT1G55580/AT1G69120/AT1G76420/AT2G34925/AT3G13300/AT5G06070/AT5G06250/AT5G53950	9	678	84	21869	3.45591	0.00116395	0.0252294	0.0225505	*
PWM	GO:0040034	regulation of development, heterochronic	AT3G06500/AT3G47710/AT4G00450/AT4G22950/AT4G40060/AT5G43270/AT5G53950	7	678	53	21869	4.26012	0.00119164	0.0254852	0.0227791
PWM	GO:0010600	regulation of auxin biosynthetic process	AT1G25220/AT1G68130/AT2G43010/AT4G28720	4	678	16	21869	8.06379	0.00123755	0.0261189	0.0233455
PWM	GO:0009739	response to gibberellin	AT1G62660/AT2G36270/AT2G36830/AT2G45660/AT3G03450/AT3G13960/AT3G63010/AT4G23060/AT5G39760/AT5G66730/AT5G67480	11	678	120	21869	2.95672	0.00127895	0.026583	0.0237604
PWM	GO:0033559	unsaturated fatty acid metabolic process	AT1G06080/AT1G06090/AT2G31360/AT4G30950/AT4G33950	5	678	27	21869	5.97318	0.00129269	0.026583	0.0237604
PWM	GO:0032350	regulation of hormone metabolic process	AT1G25220/AT1G68130/AT2G43010/AT4G28720/AT5G43270	5	678	28	21869	5.75985	0.00153402	0.0311463	0.0278392	*
PWM	GO:0009299	mRNA transcription	AT1G07090/AT2G31160/AT3G04510/AT5G28490	4	678	17	21869	7.58945	0.00157893	0.0316576	0.0282961
PWM	GO:0009933	meristem structural organization	AT1G30490/AT1G55580/AT1G69120/AT1G76420/AT2G34925/AT3G13300/AT5G06070/AT5G53950	8	678	72	21869	3.58391	0.00170833	0.0338292	0.0302371	*
PWM	GO:0046620	regulation of organ growth	AT1G13710/AT3G63530/AT4G29140/AT5G35770	4	678	18	21869	7.16781	0.00198068	0.0378215	0.0338056
PWM	GO:0048441	petal development	AT2G03710/AT2G31160/AT3G02000/AT5G06070	4	678	18	21869	7.16781	0.00198068	0.0378215	0.0338056
PWM	GO:0048465	corolla development	AT2G03710/AT2G31160/AT3G02000/AT5G06070	4	678	18	21869	7.16781	0.00198068	0.0378215	0.0338056
PWM	GO:0048481	plant ovule development	AT1G24260/AT1G30490/AT1G32240/AT2G42830/AT4G36920/AT5G23260/AT5G62230	7	678	58	21869	3.89286	0.00203471	0.0383962	0.0343192	*
PWM	GO:0009308	amine metabolic process	AT1G25220/AT1G32640/AT2G28305/AT2G40000/AT3G02470/AT4G34180/AT4G34410/AT4G35190/AT5G11950/AT5G17990/AT5G26140	11	678	128	21869	2.77193	0.0021487	0.0400758	0.0358205
PWM	GO:1900140	regulation of seedling development	AT1G16060/AT2G19450/AT2G36270/AT3G03450/AT3G06500/AT4G34220/AT4G39400/AT5G05700/AT5G66730	9	678	93	21869	3.12147	0.00237951	0.0435539	0.0389292
PWM	GO:0009639	response to red or far red light	AT1G09570/AT1G53090/AT1G75540/AT1G78080/AT2G31360/AT2G35940/AT2G42810/AT2G43010/AT2G44910/AT2G46340/AT3G02260/AT3G47710/AT3G61140/AT4G31390/AT5G08790/AT5G28490	16	678	231	21869	2.23412	0.00238949	0.0435539	0.0389292
PWM	GO:0042127	regulation of cell population proliferation	AT1G13245/AT1G13710/AT2G33880/AT2G39705/AT3G23130/AT3G50070/AT3G63530/AT4G35783/AT5G58650	9	678	94	21869	3.08826	0.00256083	0.0461525	0.041252
BaMM	GO:0009908	flower development	AT1G02065/AT1G13260/AT1G13400/AT1G13710/AT1G14720/AT1G17420/AT1G19180/AT1G24260/AT1G25250/AT1G26310/AT1G30490/AT1G32240/AT1G68130/AT1G68480/AT1G69120/AT1G70510/AT2G03710/AT2G22540/AT2G23950/AT2G27550/AT2G31160/AT2G33860/AT2G42830/AT2G45650/AT2G45660/AT3G02000/AT3G12980/AT3G23130/AT3G50330/AT3G54340/AT3G57130/AT3G57390/AT3G57670/AT3G58780/AT3G61150/AT3G63010/AT3G63530/AT4G18960/AT4G25640/AT4G30520…	65	837	493	21869	3.44485	2.36654e-18	3.98525e-15	3.58468e-15	*
BaMM	GO:0048437	floral organ development	AT1G02065/AT1G13400/AT1G13710/AT1G14720/AT1G17420/AT1G24260/AT1G25250/AT1G30490/AT1G32240/AT1G68130/AT1G68480/AT1G70510/AT2G03710/AT2G23950/AT2G31160/AT2G42830/AT2G45650/AT3G02000/AT3G23130/AT3G50330/AT3G54340/AT3G57130/AT3G58780/AT3G61150/AT3G63010/AT3G63530/AT4G18960/AT4G25640/AT4G30520/AT4G32980/AT4G36920/AT4G38680/AT4G39400/AT5G06070/AT5G07280/AT5G09805/AT5G13790/AT5G23260/AT5G27320/AT5G43270…	43	837	259	21869	4.33783	3.86961e-16	3.25821e-13	2.93072e-13	*
BaMM	GO:0090698	post-embryonic plant morphogenesis	AT1G07090/AT1G13290/AT1G24260/AT1G25220/AT1G25250/AT1G34245/AT1G68130/AT1G68480/AT1G70510/AT2G21050/AT2G30370/AT2G31160/AT2G46410/AT3G02000/AT3G02260/AT3G04510/AT3G13898/AT3G23130/AT3G23290/AT3G50330/AT3G54340/AT3G57130/AT3G63010/AT3G63440/AT4G35910/AT4G36920/AT4G39400/AT5G07280/AT5G10310/AT5G27320/AT5G28490/AT5G57390/AT5G62230	33	837	205	21869	4.20594	2.59766e-12	1.45815e-09	1.31159e-09	*
BaMM	GO:0048438	floral whorl development	AT1G02065/AT1G13400/AT1G14720/AT1G17420/AT1G24260/AT1G30490/AT1G32240/AT1G68480/AT1G70510/AT2G03710/AT2G22540/AT2G23950/AT2G31160/AT2G42830/AT3G02000/AT3G50330/AT3G57670/AT3G58780/AT4G18960/AT4G25640/AT4G30520/AT4G36920/AT4G38680/AT4G39400/AT5G06070/AT5G07280/AT5G23260/AT5G43270/AT5G58560/AT5G62230	30	837	205	21869	3.82359	2.87953e-10	1.21228e-07	1.09043e-07	*
BaMM	GO:0048507	meristem development	AT1G03170/AT1G13710/AT1G26310/AT1G30490/AT1G55580/AT1G69120/AT1G69320/AT1G71696/AT1G75820/AT1G76420/AT2G03710/AT2G22540/AT2G23950/AT2G27990/AT2G31160/AT2G33860/AT2G34925/AT2G45660/AT3G06500/AT3G47710/AT3G57130/AT3G57880/AT4G22950/AT4G30520/AT4G32980/AT4G36920/AT4G40060/AT5G03840/AT5G06070/AT5G06250/AT5G10140/AT5G11320/AT5G11530/AT5G23000/AT5G43270/AT5G53950/AT5G60690/AT5G60910	38	837	320	21869	3.10268	6.61302e-10	1.72879e-07	1.55502e-07	*
BaMM	GO:1905393	plant organ formation	AT1G13710/AT1G24260/AT1G25220/AT1G55580/AT1G58340/AT1G68480/AT1G70510/AT2G27990/AT2G34925/AT2G37630/AT3G02000/AT3G02260/AT3G23130/AT3G50330/AT3G54340/AT3G57130/AT4G35910/AT4G36920/AT4G39400/AT5G07280/AT5G23000/AT5G53950/AT5G57390	23	837	129	21869	4.65845	6.80337e-10	1.72879e-07	1.55502e-07	*
BaMM	GO:0048444	floral organ morphogenesis	AT1G24260/AT1G25250/AT1G68130/AT1G68480/AT1G70510/AT3G02000/AT3G23130/AT3G50330/AT3G54340/AT3G63010/AT4G36920/AT4G39400/AT5G07280/AT5G27320	14	837	45	21869	8.12866	7.18618e-10	1.72879e-07	1.55502e-07	*
BaMM	GO:0048646	anatomical structure formation involved in morphogenesis	AT1G13710/AT1G24260/AT1G25220/AT1G26770/AT1G26780/AT1G55580/AT1G58340/AT1G68480/AT1G70510/AT1G76420/AT2G27990/AT2G31160/AT2G34925/AT2G37630/AT2G46410/AT3G02000/AT3G02260/AT3G23130/AT3G50330/AT3G54340/AT3G57130/AT4G32980/AT4G35910/AT4G36920/AT4G39400/AT5G07280/AT5G23000/AT5G53950/AT5G57390/AT5G63370	30	837	225	21869	3.48371	2.79547e-09	5.88446e-07	5.293e-07	*
BaMM	GO:0010016	shoot system morphogenesis	AT1G13290/AT1G13710/AT1G25250/AT1G30490/AT1G34245/AT1G47485/AT1G55580/AT1G68130/AT1G68480/AT2G21050/AT2G27990/AT2G30370/AT2G34925/AT2G35612/AT2G37630/AT2G46410/AT3G02260/AT3G13898/AT3G57130/AT3G61460/AT3G63440/AT4G36870/AT5G06250/AT5G10310/AT5G23000/AT5G53950/AT5G62230/AT5G67100	28	837	205	21869	3.56868	5.47564e-09	1.02455e-06	9.21573e-07	*
BaMM	GO:0048449	floral organ formation	AT1G24260/AT1G68480/AT1G70510/AT3G02000/AT3G23130/AT3G50330/AT3G54340/AT4G36920/AT4G39400/AT5G07280	10	837	25	21869	10.4511	1.23945e-08	2.08723e-06	1.87744e-06	*
BaMM	GO:0045893	positive regulation of transcription, DNA-templated	AT1G14760/AT1G24260/AT1G26310/AT1G33280/AT1G34190/AT1G45249/AT1G49720/AT1G69120/AT1G71692/AT1G73690/AT1G75390/AT2G02080/AT2G03710/AT2G22540/AT2G36270/AT2G36610/AT2G42830/AT2G45650/AT2G45660/AT3G03460/AT3G05700/AT3G12980/AT3G17609/AT3G19290/AT3G47610/AT3G54340/AT3G54350/AT3G55990/AT3G57130/AT3G57390/AT3G58780/AT4G18960/AT4G22950/AT4G25490/AT4G35900/AT4G36240/AT4G40060/AT5G08790/AT5G09740/AT5G10140…	45	837	478	21869	2.45973	2.91198e-08	4.27103e-06	3.84174e-06	*
BaMM	GO:1902680	positive regulation of RNA biosynthetic process	AT1G14760/AT1G24260/AT1G26310/AT1G33280/AT1G34190/AT1G45249/AT1G49720/AT1G69120/AT1G71692/AT1G73690/AT1G75390/AT2G02080/AT2G03710/AT2G22540/AT2G36270/AT2G36610/AT2G42830/AT2G45650/AT2G45660/AT3G03460/AT3G05700/AT3G12980/AT3G17609/AT3G19290/AT3G47610/AT3G54340/AT3G54350/AT3G55990/AT3G57130/AT3G57390/AT3G58780/AT4G18960/AT4G22950/AT4G25490/AT4G35900/AT4G36240/AT4G40060/AT5G08790/AT5G09740/AT5G10140…	45	837	480	21869	2.44948	3.29712e-08	4.27103e-06	3.84174e-06	*
BaMM	GO:1903508	positive regulation of nucleic acid-templated transcription	AT1G14760/AT1G24260/AT1G26310/AT1G33280/AT1G34190/AT1G45249/AT1G49720/AT1G69120/AT1G71692/AT1G73690/AT1G75390/AT2G02080/AT2G03710/AT2G22540/AT2G36270/AT2G36610/AT2G42830/AT2G45650/AT2G45660/AT3G03460/AT3G05700/AT3G12980/AT3G17609/AT3G19290/AT3G47610/AT3G54340/AT3G54350/AT3G55990/AT3G57130/AT3G57390/AT3G58780/AT4G18960/AT4G22950/AT4G25490/AT4G35900/AT4G36240/AT4G40060/AT5G08790/AT5G09740/AT5G10140…	45	837	480	21869	2.44948	3.29712e-08	4.27103e-06	3.84174e-06	*
BaMM	GO:0051239	regulation of multicellular organismal process	AT1G13260/AT1G13710/AT1G16060/AT1G25250/AT1G26310/AT1G33240/AT1G34245/AT1G68480/AT2G19450/AT2G22540/AT2G27550/AT2G30370/AT2G36270/AT2G41630/AT2G45650/AT2G45660/AT2G46340/AT3G03450/AT3G06500/AT3G15270/AT3G17609/AT3G57390/AT3G63530/AT4G00450/AT4G29140/AT4G34220/AT4G35900/AT4G39070/AT4G39400/AT5G03840/AT5G08790/AT5G10140/AT5G11320/AT5G11530/AT5G13790/AT5G35770/AT5G41380/AT5G57390/AT5G57660/AT5G60910…	43	837	467	21869	2.40578	1.10862e-07	1.33351e-05	1.19948e-05	*
BaMM	GO:0045944	positive regulation of transcription by RNA polymerase II	AT1G24260/AT1G26310/AT1G69120/AT1G71692/AT1G73690/AT2G03710/AT2G22540/AT2G42830/AT2G45650/AT2G45660/AT3G12980/AT3G17609/AT3G54340/AT3G54350/AT3G57390/AT3G58780/AT4G18960/AT4G22950/AT5G09740/AT5G10140/AT5G13790/AT5G23260/AT5G60910/AT5G62165	24	837	182	21869	3.44543	1.31568e-07	1.47707e-05	1.32861e-05	*
BaMM	GO:2000026	regulation of multicellular organismal development	AT1G13260/AT1G16060/AT1G25250/AT1G26310/AT1G33240/AT1G34245/AT1G68480/AT2G19450/AT2G22540/AT2G27550/AT2G30370/AT2G36270/AT2G45650/AT2G45660/AT2G46340/AT3G03450/AT3G06500/AT3G15270/AT3G17609/AT3G57390/AT4G34220/AT4G35900/AT4G39070/AT4G39400/AT5G03840/AT5G08790/AT5G10140/AT5G11320/AT5G11530/AT5G13790/AT5G41380/AT5G57390/AT5G57660/AT5G60910/AT5G62165/AT5G66730/AT5G67100	37	837	376	21869	2.57109	1.65128e-07	1.73797e-05	1.56328e-05	*
BaMM	GO:0048580	regulation of post-embryonic development	AT1G13260/AT1G16060/AT1G25250/AT1G26310/AT1G33240/AT1G34245/AT1G68480/AT2G19450/AT2G22540/AT2G27550/AT2G30370/AT2G36270/AT2G45650/AT2G45660/AT2G46340/AT3G03450/AT3G06500/AT3G15270/AT3G17609/AT3G57390/AT4G34220/AT4G35900/AT4G39070/AT4G39400/AT5G03840/AT5G08790/AT5G10140/AT5G11320/AT5G11530/AT5G13790/AT5G41380/AT5G57660/AT5G60910/AT5G62165/AT5G66730/AT5G67100	36	837	362	21869	2.59835	1.86892e-07	1.85133e-05	1.66525e-05	*
BaMM	GO:0048440	carpel development	AT1G13400/AT1G24260/AT1G30490/AT1G32240/AT1G68480/AT1G70510/AT2G03710/AT2G42830/AT3G50330/AT3G58780/AT4G18960/AT4G36920/AT5G23260/AT5G58560/AT5G62230	15	837	82	21869	4.77948	4.45375e-07	4.16673e-05	3.74793e-05	*
BaMM	GO:0048467	gynoecium development	AT1G13400/AT1G24260/AT1G30490/AT1G32240/AT1G68480/AT1G70510/AT2G03710/AT2G42830/AT3G50330/AT3G57670/AT3G58780/AT4G18960/AT4G36920/AT5G23260/AT5G58560/AT5G62230	16	837	95	21869	4.40048	5.99244e-07	5.31119e-05	4.77735e-05	*
BaMM	GO:0010073	meristem maintenance	AT1G03170/AT1G13710/AT1G26310/AT1G69120/AT1G69320/AT1G71696/AT2G03710/AT2G22540/AT2G23950/AT2G27990/AT2G31160/AT2G33860/AT2G45660/AT3G57130/AT4G30520/AT4G32980/AT4G36920/AT5G03840/AT5G06250/AT5G10140/AT5G11320/AT5G11530/AT5G60910	23	837	185	21869	3.24833	6.92805e-07	5.66085e-05	5.09186e-05	*
BaMM	GO:0090697	post-embryonic plant organ morphogenesis	AT1G24260/AT1G25220/AT1G25250/AT1G68130/AT1G68480/AT1G70510/AT3G02000/AT3G02260/AT3G23130/AT3G50330/AT3G54340/AT3G63010/AT4G35910/AT4G36920/AT4G39400/AT5G07280/AT5G27320/AT5G57390	18	837	120	21869	3.91918	7.174e-07	5.66085e-05	5.09186e-05	*
BaMM	GO:0048831	regulation of shoot system development	AT1G13260/AT1G26310/AT1G68480/AT2G22540/AT2G27550/AT2G35612/AT2G45650/AT2G45660/AT3G57390/AT4G35900/AT4G39400/AT5G03840/AT5G10140/AT5G11320/AT5G11530/AT5G13790/AT5G41380/AT5G45300/AT5G57660/AT5G60910/AT5G62165/AT5G67100	22	837	172	21869	3.34193	7.39541e-07	5.66085e-05	5.09186e-05	*
BaMM	GO:0090696	post-embryonic plant organ development	AT1G08100/AT1G13260/AT1G24260/AT1G25220/AT1G25250/AT1G47485/AT1G64670/AT1G68130/AT1G68480/AT1G70510/AT2G44900/AT3G02000/AT3G02260/AT3G18000/AT3G23130/AT3G50330/AT3G54340/AT3G63010/AT4G35910/AT4G36920/AT4G39400/AT5G07280/AT5G27320/AT5G57390	24	837	201	21869	3.11974	8.38497e-07	6.13925e-05	5.52218e-05	*
BaMM	GO:0010022	meristem determinacy	AT1G26310/AT1G69120/AT2G22540/AT2G33860/AT3G57130/AT5G03840/AT5G10140/AT5G11320/AT5G11530	9	837	30	21869	7.83835	1.17037e-06	8.21207e-05	7.38665e-05
BaMM	GO:0048366	leaf development	AT1G13260/AT1G13290/AT1G13710/AT1G25250/AT1G31040/AT1G34190/AT1G47485/AT1G68130/AT1G68480/AT2G21050/AT2G35612/AT2G37630/AT2G46310/AT3G04060/AT3G13960/AT3G19290/AT3G54220/AT3G57130/AT3G61460/AT3G63530/AT4G11140/AT4G18960/AT4G21550/AT4G30520/AT4G33950/AT4G35890/AT4G36870/AT4G37650/AT4G37740/AT4G39400/AT5G01600/AT5G06250/AT5G08790/AT5G11320/AT5G53950/AT5G62165/AT5G67100	37	837	410	21869	2.35788	1.37811e-06	9.28294e-05	8.34989e-05	*
BaMM	GO:0007389	pattern specification process	AT1G10745/AT1G10747/AT1G13290/AT1G14760/AT1G24260/AT1G30490/AT1G32240/AT1G33240/AT1G68480/AT1G70510/AT2G21050/AT2G27990/AT2G31160/AT2G37630/AT3G23130/AT3G54220/AT3G54340/AT3G57130/AT4G00450/AT4G36920/AT4G37650/AT5G10150/AT5G56270/AT5G57390/AT5G60690	25	837	222	21869	2.94232	1.48819e-06	9.63892e-05	8.67009e-05	*
BaMM	GO:0006357	regulation of transcription by RNA polymerase II	AT1G03290/AT1G24260/AT1G26310/AT1G32330/AT1G59920/AT1G69120/AT1G70510/AT1G71692/AT1G73690/AT2G03710/AT2G22540/AT2G27990/AT2G35940/AT2G42830/AT2G45650/AT2G45660/AT2G47810/AT3G02000/AT3G05690/AT3G12980/AT3G17590/AT3G17609/AT3G54340/AT3G54350/AT3G57390/AT3G58780/AT4G00450/AT4G01460/AT4G18960/AT4G22950/AT4G32980/AT4G36870/AT5G09740/AT5G10140/AT5G11060/AT5G13790/AT5G20170/AT5G23260/AT5G46690/AT5G60910…	41	837	487	21869	2.19967	2.22618e-06	0.000138848	0.000124892	*
BaMM	GO:0009909	regulation of flower development	AT1G13260/AT1G26310/AT1G68480/AT2G22540/AT2G27550/AT2G45650/AT2G45660/AT3G57390/AT4G35900/AT4G39400/AT5G03840/AT5G10140/AT5G11320/AT5G11530/AT5G13790/AT5G41380/AT5G57660/AT5G60910/AT5G62165/AT5G67100	20	837	160	21869	3.26598	3.34488e-06	0.000201171	0.00018095	*
BaMM	GO:0010093	specification of floral organ identity	AT1G24260/AT1G68480/AT1G70510/AT3G23130/AT3G54340/AT4G36920	6	837	13	21869	12.059	4.20636e-06	0.000244259	0.000219708	*
BaMM	GO:0048581	negative regulation of post-embryonic development	AT1G13260/AT1G16060/AT1G25250/AT1G34245/AT2G22540/AT2G27550/AT2G30370/AT2G36270/AT2G46340/AT3G03450/AT3G57390/AT5G03840/AT5G10140/AT5G11530/AT5G13790/AT5G67100	16	837	113	21869	3.69952	6.3364e-06	0.000355683	0.000319932	*
BaMM	GO:0071456	cellular response to hypoxia	AT1G07150/AT1G13260/AT1G21550/AT1G25560/AT1G76600/AT2G33585/AT2G33590/AT2G40000/AT2G40140/AT2G41430/AT3G07350/AT3G10020/AT3G10040/AT3G15210/AT3G22550/AT3G30775/AT3G47720/AT3G55980/AT4G17230/AT4G27280/AT4G29780/AT5G41080/AT5G47910/AT5G57560/AT5G65207	25	837	242	21869	2.69916	7.0369e-06	0.000374819	0.000337145	*
BaMM	GO:0090701	specification of plant organ identity	AT1G24260/AT1G68480/AT1G70510/AT3G23130/AT3G54340/AT4G36920	6	837	14	21869	11.1976	7.12245e-06	0.000374819	0.000337145	*
BaMM	GO:0036294	cellular response to decreased oxygen levels	AT1G07150/AT1G13260/AT1G21550/AT1G25560/AT1G76600/AT2G33585/AT2G33590/AT2G40000/AT2G40140/AT2G41430/AT3G07350/AT3G10020/AT3G10040/AT3G15210/AT3G22550/AT3G30775/AT3G47720/AT3G55980/AT4G17230/AT4G27280/AT4G29780/AT5G41080/AT5G47910/AT5G57560/AT5G65207	25	837	244	21869	2.67703	8.13002e-06	0.000402675	0.000362201	*
BaMM	GO:0071453	cellular response to oxygen levels	AT1G07150/AT1G13260/AT1G21550/AT1G25560/AT1G76600/AT2G33585/AT2G33590/AT2G40000/AT2G40140/AT2G41430/AT3G07350/AT3G10020/AT3G10040/AT3G15210/AT3G22550/AT3G30775/AT3G47720/AT3G55980/AT4G17230/AT4G27280/AT4G29780/AT5G41080/AT5G47910/AT5G57560/AT5G65207	25	837	244	21869	2.67703	8.13002e-06	0.000402675	0.000362201	*
BaMM	GO:0051241	negative regulation of multicellular organismal process	AT1G13260/AT1G16060/AT1G25250/AT1G34245/AT2G22540/AT2G27550/AT2G30370/AT2G36270/AT2G46340/AT3G03450/AT3G57390/AT3G63530/AT5G03840/AT5G10140/AT5G11530/AT5G13790/AT5G67100	17	837	129	21869	3.4432	8.80473e-06	0.000423633	0.000381053	*
BaMM	GO:0051093	negative regulation of developmental process	AT1G13260/AT1G16060/AT1G25250/AT1G34245/AT2G22540/AT2G27550/AT2G30370/AT2G36270/AT2G46340/AT3G03450/AT3G57390/AT3G61150/AT3G63530/AT4G18960/AT5G03840/AT5G10140/AT5G11530/AT5G13790/AT5G67100	19	837	158	21869	3.14196	1.03021e-05	0.000481909	0.000433472	*
BaMM	GO:1905392	plant organ morphogenesis	AT1G13290/AT1G13710/AT1G24260/AT1G24620/AT1G25220/AT1G25250/AT1G47485/AT1G58340/AT1G68130/AT1G68480/AT1G69320/AT1G70510/AT1G71696/AT1G78870/AT2G21050/AT2G28550/AT2G35612/AT2G37630/AT2G46410/AT3G02000/AT3G02260/AT3G23130/AT3G50330/AT3G54340/AT3G57130/AT3G61460/AT3G63010/AT4G29140/AT4G30260/AT4G35910/AT4G36870/AT4G36920/AT4G39400/AT5G06250/AT5G07280/AT5G10150/AT5G27320/AT5G57390/AT5G67100	39	837	485	21869	2.101	1.14813e-05	0.000522553	0.00047003	*
BaMM	GO:0001666	response to hypoxia	AT1G07150/AT1G13260/AT1G21550/AT1G25560/AT1G76600/AT2G33585/AT2G33590/AT2G40000/AT2G40140/AT2G41430/AT3G07350/AT3G10020/AT3G10040/AT3G14230/AT3G15210/AT3G22550/AT3G30775/AT3G47720/AT3G55980/AT4G17230/AT4G27280/AT4G29780/AT5G41080/AT5G47910/AT5G57560/AT5G65207	26	837	268	21869	2.53479	1.43298e-05	0.000635035	0.000571206	*
BaMM	GO:0048859	formation of anatomical boundary	AT1G26780/AT1G76420/AT2G31160/AT3G23130/AT4G32980/AT5G53950	6	837	16	21869	9.79794	1.77827e-05	0.000725051	0.000652175
BaMM	GO:0090691	formation of plant organ boundary	AT1G26780/AT1G76420/AT2G31160/AT3G23130/AT4G32980/AT5G53950	6	837	16	21869	9.79794	1.77827e-05	0.000725051	0.000652175
BaMM	GO:0009414	response to water deprivation	AT1G16060/AT1G22810/AT1G33240/AT1G45249/AT1G56600/AT1G62660/AT1G64670/AT1G69310/AT1G76180/AT1G78080/AT2G21660/AT2G33590/AT2G33860/AT2G36270/AT2G39550/AT2G39800/AT2G41430/AT2G45960/AT3G05700/AT3G14440/AT3G15500/AT3G17410/AT3G19290/AT3G25760/AT3G30775/AT3G63520/AT4G17870/AT4G25480/AT4G25490/AT4G33950/AT4G34220/AT4G38680/AT5G13780/AT5G52440	34	837	406	21869	2.18805	1.80239e-05	0.000725051	0.000652175	*
BaMM	GO:0036293	response to decreased oxygen levels	AT1G07150/AT1G13260/AT1G21550/AT1G25560/AT1G76600/AT2G33585/AT2G33590/AT2G40000/AT2G40140/AT2G41430/AT3G07350/AT3G10020/AT3G10040/AT3G14230/AT3G15210/AT3G22550/AT3G30775/AT3G47720/AT3G55980/AT4G17230/AT4G27280/AT4G29780/AT5G41080/AT5G47910/AT5G57560/AT5G65207	26	837	272	21869	2.49751	1.85786e-05	0.000725051	0.000652175	*
BaMM	GO:0048443	stamen development	AT1G02065/AT1G13400/AT1G14720/AT1G17420/AT1G68480/AT2G03710/AT2G23950/AT3G02000/AT4G18960/AT4G25640/AT4G30520/AT4G38680/AT4G39400/AT5G07280/AT5G43270	15	837	110	21869	3.56289	1.94297e-05	0.000725051	0.000652175	*
BaMM	GO:0048466	androecium development	AT1G02065/AT1G13400/AT1G14720/AT1G17420/AT1G68480/AT2G03710/AT2G23950/AT3G02000/AT4G18960/AT4G25640/AT4G30520/AT4G38680/AT4G39400/AT5G07280/AT5G43270	15	837	110	21869	3.56289	1.94297e-05	0.000725051	0.000652175	*
BaMM	GO:0051094	positive regulation of developmental process	AT1G13710/AT1G26310/AT2G19450/AT2G45650/AT2G45660/AT2G46410/AT3G04060/AT3G19290/AT3G63530/AT4G34220/AT4G35900/AT4G39070/AT4G39400/AT5G11320/AT5G35770/AT5G57390/AT5G60910	17	837	137	21869	3.24214	1.96887e-05	0.000725051	0.000652175	*
BaMM	GO:0070482	response to oxygen levels	AT1G07150/AT1G13260/AT1G21550/AT1G25560/AT1G76600/AT2G33585/AT2G33590/AT2G40000/AT2G40140/AT2G41430/AT3G07350/AT3G10020/AT3G10040/AT3G14230/AT3G15210/AT3G22550/AT3G30775/AT3G47720/AT3G55980/AT4G17230/AT4G27280/AT4G29780/AT5G41080/AT5G47910/AT5G57560/AT5G65207	26	837	273	21869	2.48837	1.98054e-05	0.000725051	0.000652175	*
BaMM	GO:0003002	regionalization	AT1G13290/AT1G14760/AT1G24260/AT1G30490/AT1G32240/AT1G33240/AT1G68480/AT1G70510/AT2G21050/AT2G31160/AT2G37630/AT3G23130/AT3G54220/AT3G54340/AT3G57130/AT4G00450/AT4G36920/AT4G37650/AT5G57390/AT5G60690	20	837	182	21869	2.87119	2.33349e-05	0.000836084	0.000752047	*
BaMM	GO:0009415	response to water	AT1G16060/AT1G22810/AT1G33240/AT1G45249/AT1G56600/AT1G62660/AT1G64670/AT1G69310/AT1G76180/AT1G78080/AT2G21660/AT2G33590/AT2G33860/AT2G36270/AT2G39550/AT2G39800/AT2G41430/AT2G45960/AT3G05700/AT3G14440/AT3G15500/AT3G17410/AT3G19290/AT3G25760/AT3G30775/AT3G63520/AT4G17870/AT4G25480/AT4G25490/AT4G33950/AT4G34220/AT4G38680/AT5G13780/AT5G52440	34	837	416	21869	2.13545	2.96939e-05	0.00104176	0.00093705	*
BaMM	GO:0010582	floral meristem determinacy	AT1G26310/AT1G69120/AT2G22540/AT2G33860/AT3G57130/AT5G10140/AT5G11320	7	837	26	21869	7.03442	4.07781e-05	0.00140144	0.00126057
BaMM	GO:0032350	regulation of hormone metabolic process	AT1G25220/AT1G25250/AT1G68130/AT2G43010/AT4G28720/AT4G37650/AT5G43270	7	837	28	21869	6.53196	6.86543e-05	0.00231228	0.00207986	*
BaMM	GO:0001708	cell fate specification	AT1G24260/AT1G32240/AT1G68480/AT2G33860/AT2G46410/AT3G54220/AT5G07280/AT5G41315	8	837	38	21869	5.5006	7.84355e-05	0.00258991	0.00232959	*
BaMM	GO:0009910	negative regulation of flower development	AT1G13260/AT2G22540/AT2G27550/AT3G57390/AT5G03840/AT5G10140/AT5G11530/AT5G13790/AT5G67100	9	837	49	21869	4.79899	8.75562e-05	0.00283547	0.00255047
BaMM	GO:0045165	cell fate commitment	AT1G24260/AT1G32240/AT1G47485/AT1G68480/AT1G69320/AT2G33860/AT2G34925/AT2G46410/AT3G25905/AT3G54220/AT3G57670/AT5G07280/AT5G41315	13	837	98	21869	3.46594	9.1794e-05	0.00291662	0.00262347	*
BaMM	GO:0009651	response to salt stress	AT1G01140/AT1G15100/AT1G16060/AT1G45249/AT1G47485/AT1G56600/AT1G62660/AT1G69310/AT1G78080/AT2G18250/AT2G19450/AT2G21660/AT2G35612/AT2G36270/AT2G39800/AT2G45640/AT2G45960/AT3G02140/AT3G03450/AT3G05700/AT3G14440/AT3G19290/AT3G25910/AT3G27460/AT3G48680/AT3G60120/AT3G60130/AT3G61140/AT4G21870/AT4G32410/AT4G33950/AT4G37260/AT5G11150/AT5G11530/AT5G60920/AT5G67480	36	837	483	21869	1.94742	0.000117509	0.00366454	0.00329621	*
BaMM	GO:0001101	response to acid chemical	AT1G16060/AT1G22810/AT1G33240/AT1G45249/AT1G56600/AT1G62660/AT1G64670/AT1G69310/AT1G76180/AT1G78080/AT2G21660/AT2G33590/AT2G33860/AT2G36270/AT2G39550/AT2G39800/AT2G41430/AT2G45960/AT3G05700/AT3G14440/AT3G15500/AT3G17410/AT3G19290/AT3G25760/AT3G30775/AT3G63520/AT4G17870/AT4G25480/AT4G25490/AT4G33950/AT4G34220/AT4G38680/AT5G13780/AT5G52440	34	837	448	21869	1.98292	0.000127859	0.00391481	0.00352132	*
BaMM	GO:0090354	regulation of auxin metabolic process	AT1G25220/AT1G25250/AT1G68130/AT2G43010/AT4G28720/AT5G43270	6	837	22	21869	7.12577	0.000136061	0.00409156	0.00368031
BaMM	GO:0009798	axis specification	AT1G10745/AT1G10747/AT1G30490/AT1G32240/AT2G37630/AT3G57130/AT5G10150/AT5G56270/AT5G60690	9	837	53	21869	4.4368	0.000164744	0.00475259	0.0042749
BaMM	GO:0009965	leaf morphogenesis	AT1G13290/AT1G13710/AT1G25250/AT1G47485/AT1G68130/AT1G68480/AT2G21050/AT2G35612/AT2G37630/AT3G57130/AT3G61460/AT4G36870/AT5G06250/AT5G67100	14	837	118	21869	3.09991	0.000169327	0.00475259	0.0042749	*
BaMM	GO:0009640	photomorphogenesis	AT1G09570/AT1G53090/AT1G75540/AT2G43010/AT2G45430/AT2G46340/AT3G02260/AT3G17609/AT3G47710/AT3G61140/AT4G32980/AT4G39070/AT5G08790	13	837	104	21869	3.26598	0.000169332	0.00475259	0.0042749
BaMM	GO:0051240	positive regulation of multicellular organismal process	AT1G13710/AT1G26310/AT2G19450/AT2G45650/AT2G45660/AT4G34220/AT4G35900/AT4G39070/AT4G39400/AT5G11320/AT5G35770/AT5G57390/AT5G60910	13	837	104	21869	3.26598	0.000169332	0.00475259	0.0042749
BaMM	GO:0072330	monocarboxylic acid biosynthetic process	AT1G06080/AT1G06090/AT1G13280/AT1G16060/AT1G17420/AT1G64670/AT1G67730/AT1G73805/AT1G79700/AT2G31360/AT2G44620/AT2G46720/AT3G14440/AT3G23820/AT3G25760/AT3G25770/AT3G25780/AT4G13840/AT4G30950/AT4G33950/AT4G36830/AT5G43760	22	837	243	21869	2.36548	0.000175782	0.00485274	0.00436498
BaMM	GO:0010014	meristem initiation	AT1G30490/AT1G55580/AT1G76420/AT2G34925/AT5G23000/AT5G53950/AT5G60690	7	837	33	21869	5.54227	0.000209656	0.00560415	0.00504086	*
BaMM	GO:0010103	stomatal complex morphogenesis	AT1G34245/AT2G30370/AT2G46410/AT3G13898/AT3G63440/AT5G10310/AT5G62230	7	837	33	21869	5.54227	0.000209656	0.00560415	0.00504086
BaMM	GO:0010374	stomatal complex development	AT1G25250/AT1G33240/AT1G34245/AT2G30370/AT2G46410/AT3G13898/AT3G50070/AT3G63440/AT5G10310/AT5G62230	10	837	67	21869	3.89968	0.000219536	0.00577655	0.00519593	*
BaMM	GO:0009639	response to red or far red light	AT1G09570/AT1G18400/AT1G53090/AT1G75540/AT1G78080/AT2G31360/AT2G35940/AT2G42810/AT2G43010/AT2G44910/AT2G45430/AT2G46340/AT3G02260/AT3G17609/AT3G47710/AT3G61140/AT4G32980/AT4G39070/AT5G08790/AT5G28490/AT5G63870	21	837	231	21869	2.37526	0.000231091	0.00598702	0.00538525
BaMM	GO:0010600	regulation of auxin biosynthetic process	AT1G25220/AT1G25250/AT1G68130/AT2G43010/AT4G28720	5	837	16	21869	8.16495	0.000249193	0.0063582	0.00571912
BaMM	GO:0048653	anther development	AT1G02065/AT1G13400/AT1G17420/AT1G68480/AT2G23950/AT3G02000/AT4G25640/AT4G30520/AT4G39400/AT5G07280/AT5G43270	11	837	81	21869	3.54822	0.000254215	0.00638953	0.0057473	*
BaMM	GO:0009299	mRNA transcription	AT1G07090/AT2G31160/AT3G04510/AT3G23290/AT5G28490	5	837	17	21869	7.68466	0.000341943	0.00846812	0.00761697
BaMM	GO:0048532	anatomical structure arrangement	AT1G30490/AT1G55580/AT1G69120/AT1G75820/AT1G76420/AT2G34925/AT5G06070/AT5G06250/AT5G23000/AT5G53950/AT5G60690	11	837	84	21869	3.4215	0.000351061	0.00856793	0.00770675	*
BaMM	GO:0009933	meristem structural organization	AT1G30490/AT1G55580/AT1G69120/AT1G75820/AT1G76420/AT2G34925/AT5G06070/AT5G23000/AT5G53950/AT5G60690	10	837	72	21869	3.62887	0.000399752	0.00961689	0.00865027	*
BaMM	GO:0035670	plant-type ovary development	AT1G24260/AT1G30490/AT1G32240/AT2G42830/AT3G50330/AT3G58780/AT4G36920/AT5G23260/AT5G62230	9	837	60	21869	3.91918	0.000432919	0.0102681	0.00923604	*
BaMM	GO:0042761	very long-chain fatty acid biosynthetic process	AT1G06080/AT1G67730/AT2G31360/AT4G13840/AT4G36830	5	837	20	21869	6.53196	0.000778719	0.0182134	0.0163827
BaMM	GO:0000038	very long-chain fatty acid metabolic process	AT1G06080/AT1G67730/AT2G31360/AT2G45670/AT2G46720/AT4G13840/AT4G36830	7	837	41	21869	4.46085	0.00084583	0.0192484	0.0173137
BaMM	GO:0009911	positive regulation of flower development	AT1G26310/AT2G45650/AT2G45660/AT4G35900/AT4G39400/AT5G11320/AT5G60910	7	837	41	21869	4.46085	0.00084583	0.0192484	0.0173137
BaMM	GO:0009850	auxin metabolic process	AT1G25220/AT1G25250/AT1G44350/AT1G68130/AT2G33860/AT2G43010/AT4G28720/AT5G11320/AT5G43270	9	837	67	21869	3.50971	0.000987117	0.0219389	0.0197338
BaMM	GO:0046885	regulation of hormone biosynthetic process	AT1G25220/AT1G25250/AT1G68130/AT2G43010/AT4G28720	5	837	21	21869	6.22091	0.000990116	0.0219389	0.0197338
BaMM	GO:0010228	vegetative to reproductive phase transition of meristem	AT1G25560/AT1G47485/AT1G71692/AT2G21660/AT2G27550/AT2G27990/AT2G28550/AT2G45430/AT2G45650/AT2G46340/AT3G48680/AT3G57390/AT4G00450/AT4G32980/AT4G35900/AT4G38680/AT4G40060/AT5G01040/AT5G03840/AT5G13790	20	837	241	21869	2.16829	0.00102321	0.0223778	0.0201285
BaMM	GO:0065001	specification of axis polarity	AT1G30490/AT1G32240/AT2G37630/AT3G57130/AT5G10150/AT5G60690	6	837	32	21869	4.89897	0.00119238	0.0257433	0.0231558
BaMM	GO:0009733	response to auxin	AT1G47485/AT1G56650/AT1G75580/AT2G33860/AT2G39550/AT2G43010/AT3G02260/AT3G17600/AT3G51670/AT4G09160/AT4G11280/AT4G27280/AT4G29080/AT4G34410/AT4G34770/AT4G34780/AT4G34790/AT4G34800/AT4G37260/AT5G07990/AT5G10990/AT5G13790/AT5G43700/AT5G57390/AT5G57560/AT5G67480	26	837	358	21869	1.89755	0.00143812	0.0306556	0.0275744
BaMM	GO:0009944	polarity specification of adaxial/abaxial axis	AT1G30490/AT1G32240/AT2G37630/AT3G57130/AT5G60690	5	837	23	21869	5.67996	0.00153663	0.0318089	0.0286117
BaMM	GO:0071396	cellular response to lipid	AT1G15100/AT1G19180/AT1G24625/AT1G45249/AT1G49720/AT1G56650/AT1G62660/AT2G26040/AT2G30020/AT2G36830/AT2G39260/AT2G39550/AT3G02140/AT3G03450/AT3G15210/AT3G15500/AT3G17410/AT3G19290/AT3G57130/AT3G61460/AT3G63010/AT4G17870/AT4G28720/AT4G33950/AT4G34220/AT4G36830/AT4G39070/AT4G39400/AT5G27320/AT5G41315/AT5G53160/AT5G66730	32	837	476	21869	1.75649	0.00156079	0.0318089	0.0286117
BaMM	GO:0042445	hormone metabolic process	AT1G25220/AT1G25250/AT1G44350/AT1G68130/AT2G28305/AT2G33860/AT2G43010/AT3G63440/AT4G28720/AT4G37650/AT5G11320/AT5G11950/AT5G26140/AT5G43270	14	837	147	21869	2.48837	0.00156453	0.0318089	0.0286117
BaMM	GO:0048481	plant ovule development	AT1G24260/AT1G30490/AT1G32240/AT2G42830/AT3G58780/AT4G36920/AT5G23260/AT5G62230	8	837	58	21869	3.60384	0.00156778	0.0318089	0.0286117	*
BaMM	GO:0048582	positive regulation of post-embryonic development	AT1G26310/AT2G19450/AT2G45650/AT2G45660/AT4G34220/AT4G35900/AT4G39070/AT4G39400/AT5G11320/AT5G60910	10	837	87	21869	3.0032	0.00178498	0.0357847	0.0321879
BaMM	GO:0010224	response to UV-B	AT1G27840/AT1G67500/AT1G73805/AT3G17609/AT4G39400/AT5G09740/AT5G17780/AT5G23730/AT5G63860	9	837	73	21869	3.22124	0.00182906	0.036237	0.0325947
BaMM	GO:0045892	negative regulation of transcription, DNA-templated	AT1G13260/AT1G33240/AT2G22540/AT2G36080/AT2G37630/AT2G45640/AT3G02000/AT3G02140/AT3G15210/AT3G23130/AT3G48710/AT5G06250/AT5G08790/AT5G09740/AT5G11530/AT5G13790/AT5G40800/AT5G63350	18	837	219	21869	2.14749	0.00198527	0.0388744	0.034967
BaMM	GO:1902679	negative regulation of RNA biosynthetic process	AT1G13260/AT1G33240/AT2G22540/AT2G36080/AT2G37630/AT2G45640/AT3G02000/AT3G02140/AT3G15210/AT3G23130/AT3G48710/AT5G06250/AT5G08790/AT5G09740/AT5G11530/AT5G13790/AT5G40800/AT5G63350	18	837	221	21869	2.12806	0.00219326	0.041971	0.0377524
BaMM	GO:1903507	negative regulation of nucleic acid-templated transcription	AT1G13260/AT1G33240/AT2G22540/AT2G36080/AT2G37630/AT2G45640/AT3G02000/AT3G02140/AT3G15210/AT3G23130/AT3G48710/AT5G06250/AT5G08790/AT5G09740/AT5G11530/AT5G13790/AT5G40800/AT5G63350	18	837	221	21869	2.12806	0.00219326	0.041971	0.0377524
BaMM	GO:0009637	response to blue light	AT1G09570/AT1G53090/AT2G30520/AT2G43010/AT2G44830/AT2G46340/AT4G40060/AT5G28490/AT5G39760/AT5G63870	10	837	90	21869	2.90309	0.00230414	0.0435975	0.0392154
BaMM	GO:2000242	negative regulation of reproductive process	AT1G13260/AT2G22540/AT2G27550/AT3G57390/AT5G03840/AT5G10140/AT5G11530/AT5G13790/AT5G67100	9	837	76	21869	3.09409	0.0024253	0.0453801	0.0408188
BaMM	GO:0006633	fatty acid biosynthetic process	AT1G06080/AT1G06090/AT1G16060/AT1G67730/AT1G79700/AT2G31360/AT2G44620/AT2G46720/AT4G13840/AT4G30950/AT4G33950/AT4G36830/AT5G43760	13	837	138	21869	2.46132	0.00249621	0.0461936	0.0415506
BaMM	GO:0045934	negative regulation of nucleobase-containing compound metabolic process	AT1G13260/AT1G33240/AT2G22540/AT2G36080/AT2G37630/AT2G45640/AT3G02000/AT3G02140/AT3G15210/AT3G15605/AT3G23130/AT3G48710/AT5G06250/AT5G08780/AT5G08790/AT5G09740/AT5G11530/AT5G13790/AT5G40800/AT5G63350	20	837	260	21869	2.00983	0.00252512	0.0462206	0.0415749
BaMM	GO:0045493	xylan catabolic process	AT3G10740/AT4G08160/AT5G09730/AT5G49360	4	837	16	21869	6.53196	0.00268241	0.0474297	0.0426624
BaMM	GO:1902584	positive regulation of response to water deprivation	AT1G64670/AT2G33860/AT3G17410/AT4G17870	4	837	16	21869	6.53196	0.00268241	0.0474297	0.0426624
BaMM	GO:2000038	regulation of stomatal complex development	AT1G25250/AT1G33240/AT1G34245/AT2G30370	4	837	16	21869	6.53196	0.00268241	0.0474297	0.0426624
BaMM	GO:0006636	unsaturated fatty acid biosynthetic process	AT1G06080/AT1G06090/AT2G31360/AT4G30950/AT4G33950	5	837	26	21869	5.02458	0.00273199	0.0474297	0.0426624
BaMM	GO:0009956	radial pattern formation	AT3G54220/AT4G00450/AT4G37650/AT5G57390/AT5G60690	5	837	26	21869	5.02458	0.00273199	0.0474297	0.0426624
SiteGA	GO:0009908	flower development	AT1G02065/AT1G13260/AT1G13710/AT1G17420/AT1G19180/AT1G24260/AT1G25250/AT1G30490/AT1G32240/AT1G70510/AT1G75080/AT2G01940/AT2G23950/AT2G27550/AT2G33860/AT2G34710/AT2G42830/AT2G43790/AT2G45660/AT3G02000/AT3G02310/AT3G12980/AT3G50330/AT3G54340/AT3G55510/AT3G61150/AT3G61250/AT3G63010/AT3G63530/AT4G21330/AT4G24560/AT4G24972/AT4G25640/AT4G30520/AT4G31610/AT4G32980/AT4G35900/AT4G36920/AT4G38630/AT4G39400…	55	461	493	21869	5.29229	3.08442e-24	4.1763e-21	3.72078e-21	*
SiteGA	GO:0048437	floral organ development	AT1G02065/AT1G13710/AT1G17420/AT1G24260/AT1G25250/AT1G30490/AT1G32240/AT1G70510/AT1G75080/AT2G01940/AT2G23950/AT2G34710/AT2G42830/AT2G43790/AT3G02000/AT3G02310/AT3G50330/AT3G54340/AT3G61150/AT3G63010/AT3G63530/AT4G21330/AT4G24972/AT4G25640/AT4G30520/AT4G32980/AT4G36920/AT4G38630/AT4G39400/AT5G06070/AT5G07280/AT5G09805/AT5G13790/AT5G20240/AT5G23260/AT5G27320/AT5G43270	37	461	259	21869	6.77688	3.0555e-20	2.06857e-17	1.84295e-17	*
SiteGA	GO:0048444	floral organ morphogenesis	AT1G24260/AT1G25250/AT1G70510/AT2G01940/AT3G02000/AT3G50330/AT3G54340/AT3G63010/AT4G36920/AT4G38630/AT4G39400/AT5G07280/AT5G20240/AT5G27320	14	461	45	21869	14.7585	2.58531e-13	1.16683e-10	1.03957e-10	*
SiteGA	GO:0048438	floral whorl development	AT1G02065/AT1G17420/AT1G24260/AT1G30490/AT1G32240/AT1G70510/AT1G75080/AT2G23950/AT2G34710/AT2G42830/AT2G43790/AT3G02000/AT3G02310/AT3G50330/AT4G21330/AT4G24972/AT4G25640/AT4G30520/AT4G36920/AT4G38630/AT4G39400/AT5G06070/AT5G07280/AT5G23260/AT5G43270	25	461	205	21869	5.78514	1.73432e-12	5.87069e-10	5.23036e-10	*
SiteGA	GO:0090698	post-embryonic plant morphogenesis	AT1G07090/AT1G24260/AT1G25250/AT1G70510/AT1G72490/AT2G01940/AT2G21050/AT2G30370/AT2G46410/AT3G02000/AT3G02260/AT3G23290/AT3G50330/AT3G54340/AT3G63010/AT4G35910/AT4G36920/AT4G37810/AT4G38630/AT4G39400/AT5G07280/AT5G20240/AT5G27320/AT5G28490	24	461	205	21869	5.55374	1.17281e-11	3.17597e-09	2.82956e-09	*
SiteGA	GO:0048449	floral organ formation	AT1G24260/AT1G70510/AT3G02000/AT3G50330/AT3G54340/AT4G36920/AT4G38630/AT4G39400/AT5G07280/AT5G20240	10	461	25	21869	18.9753	3.87316e-11	8.74042e-09	7.78708e-09	*
SiteGA	GO:0048507	meristem development	AT1G13710/AT1G23010/AT1G30490/AT1G55580/AT1G69320/AT1G70895/AT1G75410/AT1G75820/AT1G76420/AT2G23950/AT2G33860/AT2G33880/AT2G34710/AT2G34925/AT2G43790/AT2G45660/AT3G06500/AT3G55510/AT4G22950/AT4G30520/AT4G32980/AT4G36920/AT4G40060/AT5G06070/AT5G06250/AT5G11530/AT5G43270/AT5G59810/AT5G60910	29	461	320	21869	4.29908	4.98356e-11	9.63964e-09	8.58822e-09	*
SiteGA	GO:0090697	post-embryonic plant organ morphogenesis	AT1G24260/AT1G25250/AT1G70510/AT1G72490/AT2G01940/AT3G02000/AT3G02260/AT3G50330/AT3G54340/AT3G63010/AT4G35910/AT4G36920/AT4G38630/AT4G39400/AT5G07280/AT5G20240/AT5G27320	17	461	120	21869	6.72041	6.18921e-10	1.04752e-07	9.33268e-08	*
SiteGA	GO:1905393	plant organ formation	AT1G13710/AT1G24260/AT1G55580/AT1G70510/AT2G34925/AT2G37630/AT3G02000/AT3G02260/AT3G18550/AT3G50330/AT3G54340/AT4G35910/AT4G36920/AT4G38630/AT4G39400/AT5G07280/AT5G20240	17	461	129	21869	6.25154	1.93982e-09	2.91834e-07	2.60003e-07	*
SiteGA	GO:0048646	anatomical structure formation involved in morphogenesis	AT1G13710/AT1G24260/AT1G26780/AT1G55580/AT1G70510/AT1G76420/AT2G34925/AT2G37630/AT2G37640/AT2G46410/AT3G02000/AT3G02260/AT3G18550/AT3G50330/AT3G54340/AT4G32980/AT4G35910/AT4G36920/AT4G38630/AT4G39400/AT5G07280/AT5G20240	22	461	225	21869	4.6384	2.71492e-09	3.676e-07	3.27505e-07	*
SiteGA	GO:1905392	plant organ morphogenesis	AT1G13710/AT1G24260/AT1G24620/AT1G25250/AT1G69320/AT1G70510/AT1G70895/AT1G72490/AT1G78870/AT2G01940/AT2G21050/AT2G28550/AT2G37630/AT2G43790/AT2G46410/AT3G02000/AT3G02260/AT3G50330/AT3G54340/AT3G63010/AT4G29140/AT4G31600/AT4G35910/AT4G36870/AT4G36920/AT4G38630/AT4G39400/AT5G06250/AT5G07280/AT5G08520/AT5G20240/AT5G27320/AT5G67100	33	461	485	21869	3.22775	4.02289e-09	4.95181e-07	4.4117e-07	*
SiteGA	GO:0051239	regulation of multicellular organismal process	AT1G05100/AT1G13260/AT1G13710/AT1G16060/AT1G25250/AT1G33240/AT2G27550/AT2G30370/AT2G36270/AT2G36400/AT2G41630/AT2G43790/AT2G45660/AT2G46340/AT3G06500/AT3G18550/AT3G61250/AT3G63530/AT4G29140/AT4G32010/AT4G35900/AT4G38630/AT4G39400/AT5G11530/AT5G13790/AT5G35770/AT5G37770/AT5G41380/AT5G60910/AT5G66730/AT5G67100	31	461	467	21869	3.149	2.1328e-08	2.40651e-06	2.14402e-06	*
SiteGA	GO:0035670	plant-type ovary development	AT1G24260/AT1G30490/AT1G32240/AT1G75080/AT2G34710/AT2G42830/AT2G43790/AT3G02310/AT3G50330/AT4G36920/AT5G23260	11	461	60	21869	8.697	4.38444e-08	4.56656e-06	4.06848e-06	*
SiteGA	GO:0090696	post-embryonic plant organ development	AT1G13260/AT1G24260/AT1G25250/AT1G70510/AT1G72490/AT2G01940/AT3G02000/AT3G02260/AT3G50330/AT3G54340/AT3G63010/AT4G31600/AT4G35910/AT4G36920/AT4G38630/AT4G39400/AT5G07280/AT5G20240/AT5G27320	19	461	201	21869	4.48421	5.69937e-08	5.19766e-06	4.63074e-06	*
SiteGA	GO:0048366	leaf development	AT1G05100/AT1G13260/AT1G13710/AT1G24590/AT1G25250/AT1G31040/AT2G01940/AT2G21050/AT2G36400/AT2G37630/AT2G43790/AT2G45680/AT3G13960/AT3G54220/AT3G63530/AT4G11140/AT4G21550/AT4G24560/AT4G30520/AT4G36870/AT4G37650/AT4G38630/AT4G39400/AT5G01600/AT5G06250/AT5G08520/AT5G12080/AT5G67100	28	461	410	21869	3.23968	5.75812e-08	5.19766e-06	4.63074e-06	*
SiteGA	GO:0048440	carpel development	AT1G24260/AT1G30490/AT1G32240/AT1G70510/AT1G75080/AT2G34710/AT2G42830/AT2G43790/AT3G02310/AT3G50330/AT4G36920/AT5G23260	12	461	82	21869	6.94217	1.45536e-07	1.2316e-05	1.09726e-05	*
SiteGA	GO:0006357	regulation of transcription by RNA polymerase II	AT1G03290/AT1G09060/AT1G24260/AT1G30500/AT1G32640/AT1G70510/AT1G71692/AT1G73690/AT1G75410/AT2G42830/AT2G45660/AT2G47810/AT3G02000/AT3G02310/AT3G05690/AT3G12980/AT3G54340/AT3G54350/AT3G61950/AT4G21340/AT4G22950/AT4G32980/AT4G36870/AT5G11060/AT5G13790/AT5G20240/AT5G23260/AT5G59830/AT5G60910/AT5G67410	30	461	487	21869	2.92227	1.85335e-07	1.47614e-05	1.31513e-05	*
SiteGA	GO:0048580	regulation of post-embryonic development	AT1G05100/AT1G13260/AT1G16060/AT1G25250/AT1G33240/AT2G27550/AT2G30370/AT2G36270/AT2G36400/AT2G43790/AT2G45660/AT2G46340/AT3G06500/AT3G61250/AT4G32010/AT4G35900/AT4G38630/AT4G39400/AT5G11530/AT5G13790/AT5G37770/AT5G41380/AT5G60910/AT5G66730/AT5G67100	25	461	362	21869	3.27612	2.4159e-07	1.81729e-05	1.61908e-05	*
SiteGA	GO:0048481	plant ovule development	AT1G24260/AT1G30490/AT1G32240/AT1G75080/AT2G34710/AT2G42830/AT2G43790/AT3G02310/AT4G36920/AT5G23260	10	461	58	21869	8.179	3.31801e-07	2.36452e-05	2.10662e-05	*
SiteGA	GO:0010016	shoot system morphogenesis	AT1G13710/AT1G25250/AT1G30490/AT1G55580/AT2G01940/AT2G21050/AT2G30370/AT2G34710/AT2G34925/AT2G37630/AT2G46410/AT3G02260/AT3G18550/AT4G36870/AT4G37810/AT5G06250/AT5G08520/AT5G67100	18	461	205	21869	4.1653	3.85396e-07	2.60913e-05	2.32455e-05	*
SiteGA	GO:0010073	meristem maintenance	AT1G13710/AT1G23010/AT1G69320/AT1G70895/AT2G23950/AT2G33860/AT2G33880/AT2G43790/AT2G45660/AT3G55510/AT4G30520/AT4G32980/AT4G36920/AT5G06250/AT5G11530/AT5G59810/AT5G60910	17	461	185	21869	4.35918	4.26329e-07	2.7488e-05	2.44899e-05	*
SiteGA	GO:2000026	regulation of multicellular organismal development	AT1G05100/AT1G13260/AT1G16060/AT1G25250/AT1G33240/AT2G27550/AT2G30370/AT2G36270/AT2G36400/AT2G43790/AT2G45660/AT2G46340/AT3G06500/AT3G61250/AT4G32010/AT4G35900/AT4G38630/AT4G39400/AT5G11530/AT5G13790/AT5G37770/AT5G41380/AT5G60910/AT5G66730/AT5G67100	25	461	376	21869	3.15413	4.9095e-07	3.02157e-05	2.692e-05	*
SiteGA	GO:0048467	gynoecium development	AT1G24260/AT1G30490/AT1G32240/AT1G70510/AT1G75080/AT2G34710/AT2G42830/AT2G43790/AT3G02310/AT3G50330/AT4G36920/AT5G23260	12	461	95	21869	5.99219	7.49823e-07	4.41418e-05	3.93271e-05	*
SiteGA	GO:0048653	anther development	AT1G02065/AT1G17420/AT2G23950/AT3G02000/AT4G21330/AT4G24972/AT4G25640/AT4G30520/AT4G39400/AT5G07280/AT5G43270	11	461	81	21869	6.44222	1.04224e-06	5.87995e-05	5.23861e-05	*
SiteGA	GO:0048443	stamen development	AT1G02065/AT1G17420/AT2G23950/AT3G02000/AT4G21330/AT4G24972/AT4G25640/AT4G30520/AT4G38630/AT4G39400/AT5G07280/AT5G43270	12	461	110	21869	5.17507	3.62899e-06	0.000188986	0.000168373	*
SiteGA	GO:0048466	androecium development	AT1G02065/AT1G17420/AT2G23950/AT3G02000/AT4G21330/AT4G24972/AT4G25640/AT4G30520/AT4G38630/AT4G39400/AT5G07280/AT5G43270	12	461	110	21869	5.17507	3.62899e-06	0.000188986	0.000168373	*
SiteGA	GO:0010093	specification of floral organ identity	AT1G24260/AT1G70510/AT3G54340/AT4G36920/AT5G20240	5	461	13	21869	18.2455	4.55901e-06	0.000228626	0.000203689	*
SiteGA	GO:0007389	pattern specification process	AT1G10745/AT1G10747/AT1G24260/AT1G24590/AT1G30490/AT1G32240/AT1G33240/AT1G70510/AT2G21050/AT2G34710/AT2G37630/AT2G43790/AT3G54220/AT3G54340/AT4G36920/AT4G37650/AT5G20240	17	461	222	21869	3.63265	5.2793e-06	0.000255292	0.000227446	*
SiteGA	GO:0090701	specification of plant organ identity	AT1G24260/AT1G70510/AT3G54340/AT4G36920/AT5G20240	5	461	14	21869	16.9422	6.96901e-06	0.000315307	0.000280916	*
SiteGA	GO:0045165	cell fate commitment	AT1G24260/AT1G32240/AT1G69320/AT1G70895/AT2G33860/AT2G34925/AT2G46410/AT3G25905/AT3G54220/AT4G24972/AT5G07280	11	461	98	21869	5.32469	6.98613e-06	0.000315307	0.000280916	*
SiteGA	GO:0045944	positive regulation of transcription by RNA polymerase II	AT1G24260/AT1G71692/AT1G73690/AT2G42830/AT2G45660/AT3G02310/AT3G12980/AT3G54340/AT3G54350/AT4G22950/AT5G13790/AT5G20240/AT5G23260/AT5G59830/AT5G60910	15	461	182	21869	3.90974	7.7869e-06	0.000340112	0.000303015	*
SiteGA	GO:2000038	regulation of stomatal complex development	AT1G05100/AT1G25250/AT1G33240/AT2G30370/AT2G43790	5	461	16	21869	14.8244	1.46835e-05	0.000621296	0.00055353
SiteGA	GO:0071456	cellular response to hypoxia	AT1G09070/AT1G13260/AT1G18300/AT2G22500/AT2G40140/AT2G41430/AT3G07350/AT3G10020/AT3G15210/AT3G52800/AT3G56880/AT4G24570/AT4G27280/AT4G29780/AT5G20230/AT5G59820/AT5G65207	17	461	242	21869	3.33243	1.64227e-05	0.000673827	0.000600331	*
SiteGA	GO:0036294	cellular response to decreased oxygen levels	AT1G09070/AT1G13260/AT1G18300/AT2G22500/AT2G40140/AT2G41430/AT3G07350/AT3G10020/AT3G15210/AT3G52800/AT3G56880/AT4G24570/AT4G27280/AT4G29780/AT5G20230/AT5G59820/AT5G65207	17	461	244	21869	3.30512	1.82645e-05	0.000706574	0.000629506	*
SiteGA	GO:0071453	cellular response to oxygen levels	AT1G09070/AT1G13260/AT1G18300/AT2G22500/AT2G40140/AT2G41430/AT3G07350/AT3G10020/AT3G15210/AT3G52800/AT3G56880/AT4G24570/AT4G27280/AT4G29780/AT5G20230/AT5G59820/AT5G65207	17	461	244	21869	3.30512	1.82645e-05	0.000706574	0.000629506	*
SiteGA	GO:0051093	negative regulation of developmental process	AT1G13260/AT1G16060/AT1G25250/AT2G27550/AT2G30370/AT2G36270/AT2G45680/AT2G46340/AT3G61150/AT3G63530/AT5G11530/AT5G13790/AT5G67100	13	461	158	21869	3.90314	3.17462e-05	0.00116949	0.00104193	*
SiteGA	GO:0045893	positive regulation of transcription, DNA-templated	AT1G24260/AT1G32640/AT1G49720/AT1G71692/AT1G73690/AT2G02070/AT2G36270/AT2G42830/AT2G45660/AT3G02310/AT3G05700/AT3G12980/AT3G54340/AT3G54350/AT4G22950/AT4G25490/AT4G35900/AT4G36240/AT4G40060/AT5G08520/AT5G13790/AT5G20240/AT5G23260/AT5G59830/AT5G60910	25	461	478	21869	2.48108	3.26915e-05	0.00116949	0.00104193	*
SiteGA	GO:0003002	regionalization	AT1G24260/AT1G30490/AT1G32240/AT1G33240/AT1G70510/AT2G21050/AT2G34710/AT2G37630/AT2G43790/AT3G54220/AT3G54340/AT4G36920/AT4G37650/AT5G20240	14	461	182	21869	3.64909	3.37109e-05	0.00116949	0.00104193	*
SiteGA	GO:1902680	positive regulation of RNA biosynthetic process	AT1G24260/AT1G32640/AT1G49720/AT1G71692/AT1G73690/AT2G02070/AT2G36270/AT2G42830/AT2G45660/AT3G02310/AT3G05700/AT3G12980/AT3G54340/AT3G54350/AT4G22950/AT4G25490/AT4G35900/AT4G36240/AT4G40060/AT5G08520/AT5G13790/AT5G20240/AT5G23260/AT5G59830/AT5G60910	25	461	480	21869	2.47074	3.50028e-05	0.00116949	0.00104193	*
SiteGA	GO:1903508	positive regulation of nucleic acid-templated transcription	AT1G24260/AT1G32640/AT1G49720/AT1G71692/AT1G73690/AT2G02070/AT2G36270/AT2G42830/AT2G45660/AT3G02310/AT3G05700/AT3G12980/AT3G54340/AT3G54350/AT4G22950/AT4G25490/AT4G35900/AT4G36240/AT4G40060/AT5G08520/AT5G13790/AT5G20240/AT5G23260/AT5G59830/AT5G60910	25	461	480	21869	2.47074	3.50028e-05	0.00116949	0.00104193	*
SiteGA	GO:0040008	regulation of growth	AT1G13710/AT1G16060/AT1G32610/AT1G33240/AT1G72490/AT2G23950/AT2G33880/AT2G41630/AT2G43790/AT2G44610/AT3G05500/AT3G63530/AT4G29140/AT4G30520/AT4G40060/AT5G08520/AT5G35770	17	461	257	21869	3.13793	3.54128e-05	0.00116949	0.00104193
SiteGA	GO:0009409	response to cold	AT1G01140/AT2G21060/AT2G36400/AT2G40140/AT2G43790/AT2G45660/AT3G06510/AT3G13960/AT3G23830/AT3G61950/AT4G17090/AT4G22950/AT4G25480/AT4G25490/AT4G34710/AT5G01600/AT5G06070/AT5G20230/AT5G37770/AT5G43760/AT5G58940/AT5G59820	22	461	400	21869	2.6091	4.60911e-05	0.00148589	0.00132382
SiteGA	GO:0009739	response to gibberellin	AT1G50420/AT2G36270/AT2G36400/AT2G37640/AT2G45660/AT3G13960/AT3G63010/AT4G36880/AT5G08520/AT5G27320/AT5G66730	11	461	120	21869	4.3485	4.78113e-05	0.0015055	0.00134129
SiteGA	GO:0001666	response to hypoxia	AT1G09070/AT1G13260/AT1G18300/AT2G22500/AT2G40140/AT2G41430/AT3G07350/AT3G10020/AT3G15210/AT3G52800/AT3G56880/AT4G24570/AT4G27280/AT4G29780/AT5G20230/AT5G59820/AT5G65207	17	461	268	21869	3.00914	5.97999e-05	0.00184021	0.00163949	*
SiteGA	GO:0036293	response to decreased oxygen levels	AT1G09070/AT1G13260/AT1G18300/AT2G22500/AT2G40140/AT2G41430/AT3G07350/AT3G10020/AT3G15210/AT3G52800/AT3G56880/AT4G24570/AT4G27280/AT4G29780/AT5G20230/AT5G59820/AT5G65207	17	461	272	21869	2.96489	7.17987e-05	0.00216034	0.00192471	*
SiteGA	GO:0070482	response to oxygen levels	AT1G09070/AT1G13260/AT1G18300/AT2G22500/AT2G40140/AT2G41430/AT3G07350/AT3G10020/AT3G15210/AT3G52800/AT3G56880/AT4G24570/AT4G27280/AT4G29780/AT5G20230/AT5G59820/AT5G65207	17	461	273	21869	2.95403	7.51112e-05	0.00221088	0.00196974	*
SiteGA	GO:0010374	stomatal complex development	AT1G05100/AT1G25250/AT1G32640/AT1G33240/AT2G30370/AT2G43790/AT2G46410/AT4G37810	8	461	67	21869	5.66426	8.05291e-05	0.00231992	0.00206688	*
SiteGA	GO:0051241	negative regulation of multicellular organismal process	AT1G13260/AT1G16060/AT1G25250/AT2G27550/AT2G30370/AT2G36270/AT2G46340/AT3G63530/AT5G11530/AT5G13790/AT5G67100	11	461	129	21869	4.04512	9.25247e-05	0.00260997	0.00232529	*
SiteGA	GO:0001708	cell fate specification	AT1G24260/AT1G32240/AT2G33860/AT2G46410/AT3G54220/AT5G07280	6	461	38	21869	7.49024	0.00013231	0.00365607	0.00325729	*
SiteGA	GO:0048581	negative regulation of post-embryonic development	AT1G13260/AT1G16060/AT1G25250/AT2G27550/AT2G30370/AT2G36270/AT2G46340/AT5G11530/AT5G13790/AT5G67100	10	461	113	21869	4.19807	0.000140861	0.00381453	0.00339847	*
SiteGA	GO:0009909	regulation of flower development	AT1G13260/AT2G27550/AT2G45660/AT3G61250/AT4G35900/AT4G39400/AT5G11530/AT5G13790/AT5G37770/AT5G41380/AT5G60910/AT5G67100	12	461	160	21869	3.55786	0.000154228	0.0040946	0.00364799	*
SiteGA	GO:0051094	positive regulation of developmental process	AT1G05100/AT1G13710/AT2G45660/AT2G46410/AT3G63530/AT4G32010/AT4G35900/AT4G39400/AT5G08520/AT5G35770/AT5G60910	11	461	137	21869	3.8089	0.000158444	0.00412563	0.00367563	*
SiteGA	GO:0009651	response to salt stress	AT1G01140/AT1G16060/AT1G69310/AT2G18250/AT2G36270/AT2G39800/AT2G43790/AT2G45960/AT3G05700/AT3G23830/AT3G25910/AT3G27460/AT3G56880/AT3G61140/AT4G21870/AT4G24560/AT4G32410/AT4G34710/AT4G38630/AT5G08520/AT5G11530/AT5G58940/AT5G59820	23	461	483	21869	2.25896	0.000265558	0.00678425	0.00604427	*
SiteGA	GO:0048831	regulation of shoot system development	AT1G13260/AT2G27550/AT2G45660/AT3G61250/AT4G35900/AT4G39400/AT5G11530/AT5G13790/AT5G37770/AT5G41380/AT5G60910/AT5G67100	12	461	172	21869	3.30964	0.00030195	0.00757112	0.00674532	*
SiteGA	GO:0048532	anatomical structure arrangement	AT1G30490/AT1G55580/AT1G75820/AT1G76420/AT2G34710/AT2G34925/AT5G06070/AT5G06250	8	461	84	21869	4.51792	0.00039425	0.00970572	0.00864709	*
SiteGA	GO:0009414	response to water deprivation	AT1G16060/AT1G32640/AT1G33240/AT1G69310/AT2G33860/AT2G36270/AT2G39800/AT2G41430/AT2G45960/AT3G05500/AT3G05700/AT3G23830/AT3G46620/AT3G56880/AT3G63520/AT4G17870/AT4G25480/AT4G25490/AT5G08520/AT5G13780	20	461	406	21869	2.33686	0.000429068	0.0103742	0.0092427	*
SiteGA	GO:0046620	regulation of organ growth	AT1G13710/AT3G63530/AT4G29140/AT5G35770	4	461	18	21869	10.5418	0.000471624	0.0112031	0.00998118
SiteGA	GO:0043455	regulation of secondary metabolic process	AT4G27260/AT4G32980/AT4G38620/AT5G08520/AT5G20230/AT5G23260/AT5G65410	7	461	67	21869	4.95623	0.000516455	0.0120566	0.0107415
SiteGA	GO:0009415	response to water	AT1G16060/AT1G32640/AT1G33240/AT1G69310/AT2G33860/AT2G36270/AT2G39800/AT2G41430/AT2G45960/AT3G05500/AT3G05700/AT3G23830/AT3G46620/AT3G56880/AT3G63520/AT4G17870/AT4G25480/AT4G25490/AT5G08520/AT5G13780	20	461	416	21869	2.28068	0.000582621	0.0132044	0.0117642	*
SiteGA	GO:0010014	meristem initiation	AT1G30490/AT1G55580/AT1G76420/AT2G34710/AT2G34925	5	461	33	21869	7.1876	0.000593837	0.0132044	0.0117642	*
SiteGA	GO:0001101	response to acid chemical	AT1G16060/AT1G32640/AT1G33240/AT1G69310/AT2G33860/AT2G36270/AT2G39800/AT2G41430/AT2G43790/AT2G45960/AT3G05500/AT3G05700/AT3G23830/AT3G46620/AT3G56880/AT3G63520/AT4G17870/AT4G25480/AT4G25490/AT5G08520/AT5G13780	21	461	448	21869	2.22366	0.000594881	0.0132044	0.0117642	*
SiteGA	GO:0009933	meristem structural organization	AT1G30490/AT1G55580/AT1G75820/AT1G76420/AT2G34710/AT2G34925/AT5G06070	7	461	72	21869	4.61205	0.000799494	0.0174599	0.0155555	*
SiteGA	GO:0009798	axis specification	AT1G10745/AT1G10747/AT1G30490/AT1G32240/AT2G34710/AT2G37630	6	461	53	21869	5.37036	0.0008432	0.0181221	0.0161455
SiteGA	GO:0009965	leaf morphogenesis	AT1G13710/AT1G25250/AT2G01940/AT2G21050/AT2G37630/AT4G36870/AT5G06250/AT5G08520/AT5G67100	9	461	118	21869	3.61817	0.000895267	0.0189405	0.0168746	*
SiteGA	GO:0009944	polarity specification of adaxial/abaxial axis	AT1G30490/AT1G32240/AT2G34710/AT2G37630	4	461	23	21869	8.25012	0.00125561	0.0261554	0.0233025
SiteGA	GO:2000241	regulation of reproductive process	AT1G13260/AT1G32610/AT2G27550/AT2G41630/AT2G45660/AT2G46340/AT2G46980/AT3G61250/AT4G32010/AT4G35900/AT4G39400/AT5G11530/AT5G13790/AT5G23260/AT5G37770/AT5G41380/AT5G60910/AT5G67100	18	461	388	21869	2.20074	0.00160436	0.0325215	0.0289743
SiteGA	GO:0048506	regulation of timing of meristematic phase transition	AT1G75410/AT3G06500/AT4G22950/AT4G40060/AT5G43270	5	461	41	21869	5.78514	0.00163328	0.0325215	0.0289743
SiteGA	GO:0048510	regulation of timing of transition from vegetative to reproductive phase	AT1G75410/AT3G06500/AT4G22950/AT4G40060/AT5G43270	5	461	41	21869	5.78514	0.00163328	0.0325215	0.0289743
SiteGA	GO:0009554	megasporogenesis	AT1G02065/AT2G41420/AT5G35770	3	461	12	21869	11.8595	0.00177679	0.0343682	0.0306196
SiteGA	GO:0080060	integument development	AT1G30490/AT2G34710/AT5G23260	3	461	12	21869	11.8595	0.00177679	0.0343682	0.0306196
SiteGA	GO:0009880	embryonic pattern specification	AT1G10745/AT1G10747/AT1G24590/AT1G30490	4	461	26	21869	7.29818	0.00201673	0.0380846	0.0339306
SiteGA	GO:0048638	regulation of developmental growth	AT1G13710/AT1G32610/AT2G23950/AT2G33880/AT2G41630/AT2G43790/AT3G63530/AT4G29140/AT4G30520/AT5G08520/AT5G35770	11	461	186	21869	2.80548	0.00204592	0.0380846	0.0339306
SiteGA	GO:0009611	response to wounding	AT1G01140/AT1G16090/AT1G17420/AT1G19180/AT1G32640/AT1G73080/AT2G30020/AT2G39260/AT2G46970/AT4G11280/AT4G34710/AT5G20230/AT5G59820	13	461	243	21869	2.53784	0.00205331	0.0380846	0.0339306
SiteGA	GO:0009943	adaxial/abaxial axis specification	AT1G30490/AT1G32240/AT2G34710/AT2G37630	4	461	28	21869	6.77688	0.00267188	0.0476016	0.0424096
SiteGA	GO:0032350	regulation of hormone metabolic process	AT1G25250/AT2G01940/AT4G37650/AT5G43270	4	461	28	21869	6.77688	0.00267188	0.0476016	0.0424096	*
SiteGA	GO:0035265	organ growth	AT1G13710/AT3G63530/AT4G29140/AT5G35770	4	461	28	21869	6.77688	0.00267188	0.0476016	0.0424096
SiteGA	GO:0006120	mitochondrial electron transport, NADH to ubiquinone	AT2G44620/AT4G34700/AT5G08530	3	461	14	21869	10.1653	0.00284904	0.0494565	0.0440621
SiteGA	GO:0048639	positive regulation of developmental growth	AT1G13710/AT5G08520/AT5G35770	3	461	14	21869	10.1653	0.00284904	0.0494565	0.0440621
Peaks	GO:0009908	flower development	AT1G02065/AT1G08320/AT1G13260/AT1G13400/AT1G13710/AT1G14720/AT1G17420/AT1G19180/AT1G24260/AT1G25250/AT1G26310/AT1G30330/AT1G30490/AT1G32240/AT1G68130/AT1G68480/AT1G69120/AT1G70510/AT1G75080/AT1G75520/AT2G01940/AT2G03710/AT2G22540/AT2G23950/AT2G27550/AT2G31160/AT2G33860/AT2G34710/AT2G36910/AT2G41370/AT2G42200/AT2G42830/AT2G43790/AT2G45650/AT2G45660/AT3G02000/AT3G02310/AT3G12980/AT3G23130/AT3G50330…	98	1326	493	21869	3.27842	5.02923e-26	9.8422e-23	8.56028e-23	*
Peaks	GO:0048437	floral organ development	AT1G02065/AT1G08320/AT1G13400/AT1G13710/AT1G14720/AT1G17420/AT1G24260/AT1G25250/AT1G30490/AT1G32240/AT1G68130/AT1G68480/AT1G70510/AT1G75080/AT1G75520/AT2G01940/AT2G03710/AT2G23950/AT2G31160/AT2G34710/AT2G36910/AT2G41370/AT2G42200/AT2G42830/AT2G43790/AT2G45650/AT3G02000/AT3G02310/AT3G23130/AT3G50330/AT3G54340/AT3G57130/AT3G57920/AT3G58780/AT3G61150/AT3G63010/AT3G63530/AT4G13540/AT4G18960/AT4G21330…	64	1326	259	21869	4.07536	1.35083e-22	1.32179e-19	1.14963e-19	*
Peaks	GO:0048438	floral whorl development	AT1G02065/AT1G08320/AT1G13400/AT1G14720/AT1G17420/AT1G24260/AT1G30490/AT1G32240/AT1G68480/AT1G70510/AT1G75080/AT1G75520/AT2G03710/AT2G22540/AT2G23950/AT2G31160/AT2G34710/AT2G36910/AT2G42200/AT2G42830/AT2G43790/AT3G02000/AT3G02310/AT3G50330/AT3G57670/AT3G57920/AT3G58780/AT4G13540/AT4G18960/AT4G21330/AT4G24972/AT4G25640/AT4G30520/AT4G35080/AT4G36920/AT4G38630/AT4G38680/AT4G39400/AT5G06070/AT5G07180…	48	1326	205	21869	3.86165	2.85908e-16	1.86507e-13	1.62215e-13	*
Peaks	GO:0090698	post-embryonic plant morphogenesis	AT1G07090/AT1G13290/AT1G24260/AT1G25220/AT1G25250/AT1G34245/AT1G68130/AT1G68480/AT1G70510/AT1G71866/AT1G72490/AT2G01940/AT2G21050/AT2G30370/AT2G31160/AT2G41370/AT2G42610/AT2G46410/AT3G02000/AT3G02260/AT3G04510/AT3G07390/AT3G13898/AT3G23130/AT3G23290/AT3G50330/AT3G54340/AT3G57130/AT3G63010/AT3G63440/AT4G35910/AT4G36920/AT4G37810/AT4G38630/AT4G39400/AT5G07180/AT5G07280/AT5G10310/AT5G10510/AT5G20240…	44	1326	205	21869	3.53984	1.36542e-13	6.68032e-11	5.81023e-11	*
Peaks	GO:0048507	meristem development	AT1G03170/AT1G13710/AT1G23010/AT1G23380/AT1G26310/AT1G30490/AT1G55580/AT1G69120/AT1G69320/AT1G70895/AT1G71696/AT1G75410/AT1G75820/AT1G76420/AT2G03710/AT2G22540/AT2G23950/AT2G27990/AT2G31160/AT2G33860/AT2G33880/AT2G34710/AT2G34925/AT2G41370/AT2G43790/AT2G45660/AT3G03773/AT3G06500/AT3G13300/AT3G47710/AT3G55510/AT3G57130/AT3G57880/AT4G22950/AT4G28190/AT4G30520/AT4G32980/AT4G36920/AT4G40060/AT5G03840…	56	1326	320	21869	2.88618	6.18808e-13	2.42201e-10	2.10655e-10	*
Peaks	GO:0071456	cellular response to hypoxia	AT1G07135/AT1G07150/AT1G09070/AT1G13260/AT1G18300/AT1G21550/AT1G25560/AT1G27730/AT1G32928/AT1G55810/AT1G66180/AT1G76600/AT2G22500/AT2G33585/AT2G33590/AT2G40000/AT2G40140/AT2G41430/AT3G03270/AT3G03280/AT3G07350/AT3G10020/AT3G10040/AT3G13310/AT3G15210/AT3G22550/AT3G30775/AT3G47720/AT3G52800/AT3G55980/AT3G56880/AT4G17230/AT4G24570/AT4G27280/AT4G29780/AT4G34150/AT5G06320/AT5G19120/AT5G20230/AT5G35735…	47	1326	242	21869	3.20308	9.72538e-13	3.17209e-10	2.75894e-10	*
Peaks	GO:0036294	cellular response to decreased oxygen levels	AT1G07135/AT1G07150/AT1G09070/AT1G13260/AT1G18300/AT1G21550/AT1G25560/AT1G27730/AT1G32928/AT1G55810/AT1G66180/AT1G76600/AT2G22500/AT2G33585/AT2G33590/AT2G40000/AT2G40140/AT2G41430/AT3G03270/AT3G03280/AT3G07350/AT3G10020/AT3G10040/AT3G13310/AT3G15210/AT3G22550/AT3G30775/AT3G47720/AT3G52800/AT3G55980/AT3G56880/AT4G17230/AT4G24570/AT4G27280/AT4G29780/AT4G34150/AT5G06320/AT5G19120/AT5G20230/AT5G35735…	47	1326	244	21869	3.17683	1.32661e-12	3.24521e-10	2.82253e-10	*
Peaks	GO:0071453	cellular response to oxygen levels	AT1G07135/AT1G07150/AT1G09070/AT1G13260/AT1G18300/AT1G21550/AT1G25560/AT1G27730/AT1G32928/AT1G55810/AT1G66180/AT1G76600/AT2G22500/AT2G33585/AT2G33590/AT2G40000/AT2G40140/AT2G41430/AT3G03270/AT3G03280/AT3G07350/AT3G10020/AT3G10040/AT3G13310/AT3G15210/AT3G22550/AT3G30775/AT3G47720/AT3G52800/AT3G55980/AT3G56880/AT4G17230/AT4G24570/AT4G27280/AT4G29780/AT4G34150/AT5G06320/AT5G19120/AT5G20230/AT5G35735…	47	1326	244	21869	3.17683	1.32661e-12	3.24521e-10	2.82253e-10	*
Peaks	GO:0010016	shoot system morphogenesis	AT1G13290/AT1G13710/AT1G25250/AT1G30490/AT1G34245/AT1G47485/AT1G55580/AT1G68130/AT1G68480/AT1G71866/AT2G01940/AT2G21050/AT2G23760/AT2G27990/AT2G30370/AT2G34710/AT2G34925/AT2G35612/AT2G37630/AT2G41370/AT2G42200/AT2G46410/AT3G02260/AT3G13300/AT3G13898/AT3G18550/AT3G57130/AT3G61460/AT3G63440/AT4G36870/AT4G37810/AT5G06250/AT5G07180/AT5G08070/AT5G08520/AT5G10310/AT5G13300/AT5G23000/AT5G53950/AT5G62230…	42	1326	205	21869	3.37894	2.5105e-12	5.45893e-10	4.74792e-10	*
Peaks	GO:0048366	leaf development	AT1G05100/AT1G12980/AT1G13260/AT1G13290/AT1G13710/AT1G24590/AT1G25250/AT1G31040/AT1G34190/AT1G47485/AT1G68130/AT1G68480/AT2G01940/AT2G21050/AT2G23760/AT2G28890/AT2G34650/AT2G35612/AT2G36400/AT2G37630/AT2G42200/AT2G43790/AT2G45680/AT2G46310/AT3G04060/AT3G13300/AT3G13960/AT3G19290/AT3G27010/AT3G27920/AT3G54220/AT3G57130/AT3G61460/AT3G63530/AT4G11140/AT4G18960/AT4G21550/AT4G24560/AT4G30520/AT4G33950…	64	1326	410	21869	2.57443	2.90717e-12	5.68933e-10	4.94831e-10	*
Peaks	GO:0001666	response to hypoxia	AT1G07135/AT1G07150/AT1G09070/AT1G13260/AT1G18300/AT1G21550/AT1G25560/AT1G27730/AT1G32928/AT1G55810/AT1G66180/AT1G76600/AT2G22500/AT2G33585/AT2G33590/AT2G40000/AT2G40140/AT2G41430/AT3G03270/AT3G03280/AT3G07350/AT3G10020/AT3G10040/AT3G13310/AT3G14230/AT3G15210/AT3G22550/AT3G30775/AT3G47720/AT3G52800/AT3G55980/AT3G56880/AT4G17230/AT4G24570/AT4G27280/AT4G29780/AT4G34150/AT5G06320/AT5G19120/AT5G20230…	48	1326	268	21869	2.95387	1.18778e-11	2.11316e-09	1.83793e-09	*
Peaks	GO:0036293	response to decreased oxygen levels	AT1G07135/AT1G07150/AT1G09070/AT1G13260/AT1G18300/AT1G21550/AT1G25560/AT1G27730/AT1G32928/AT1G55810/AT1G66180/AT1G76600/AT2G22500/AT2G33585/AT2G33590/AT2G40000/AT2G40140/AT2G41430/AT3G03270/AT3G03280/AT3G07350/AT3G10020/AT3G10040/AT3G13310/AT3G14230/AT3G15210/AT3G22550/AT3G30775/AT3G47720/AT3G52800/AT3G55980/AT3G56880/AT4G17230/AT4G24570/AT4G27280/AT4G29780/AT4G34150/AT5G06320/AT5G19120/AT5G20230…	48	1326	272	21869	2.91043	2.04745e-11	3.33905e-09	2.90415e-09	*
Peaks	GO:0070482	response to oxygen levels	AT1G07135/AT1G07150/AT1G09070/AT1G13260/AT1G18300/AT1G21550/AT1G25560/AT1G27730/AT1G32928/AT1G55810/AT1G66180/AT1G76600/AT2G22500/AT2G33585/AT2G33590/AT2G40000/AT2G40140/AT2G41430/AT3G03270/AT3G03280/AT3G07350/AT3G10020/AT3G10040/AT3G13310/AT3G14230/AT3G15210/AT3G22550/AT3G30775/AT3G47720/AT3G52800/AT3G55980/AT3G56880/AT4G17230/AT4G24570/AT4G27280/AT4G29780/AT4G34150/AT5G06320/AT5G19120/AT5G20230…	48	1326	273	21869	2.89977	2.34139e-11	3.5247e-09	3.06562e-09	*
Peaks	GO:0048467	gynoecium development	AT1G13400/AT1G24260/AT1G30490/AT1G32240/AT1G68480/AT1G70510/AT1G75080/AT1G75520/AT2G03710/AT2G34710/AT2G42830/AT2G43790/AT3G02310/AT3G50330/AT3G57670/AT3G58780/AT4G18960/AT4G35080/AT4G36920/AT5G07180/AT5G21150/AT5G23260/AT5G42080/AT5G58560/AT5G62230	25	1326	95	21869	4.34012	2.69617e-10	3.76886e-08	3.27798e-08	*
Peaks	GO:0048440	carpel development	AT1G13400/AT1G24260/AT1G30490/AT1G32240/AT1G68480/AT1G70510/AT1G75080/AT2G03710/AT2G34710/AT2G42830/AT2G43790/AT3G02310/AT3G50330/AT3G58780/AT4G18960/AT4G35080/AT4G36920/AT5G07180/AT5G21150/AT5G23260/AT5G42080/AT5G58560/AT5G62230	23	1326	82	21869	4.62593	3.48117e-10	4.54176e-08	3.95021e-08	*
Peaks	GO:0048444	floral organ morphogenesis	AT1G24260/AT1G25250/AT1G68130/AT1G68480/AT1G70510/AT2G01940/AT3G02000/AT3G23130/AT3G50330/AT3G54340/AT3G63010/AT4G36920/AT4G38630/AT4G39400/AT5G07280/AT5G20240/AT5G27320	17	1326	45	21869	6.23048	3.98134e-10	4.76686e-08	4.14599e-08	*
Peaks	GO:0010073	meristem maintenance	AT1G03170/AT1G13710/AT1G23010/AT1G23380/AT1G26310/AT1G69120/AT1G69320/AT1G70895/AT1G71696/AT2G03710/AT2G22540/AT2G23950/AT2G27990/AT2G31160/AT2G33860/AT2G33880/AT2G41370/AT2G43790/AT2G45660/AT3G55510/AT3G57130/AT4G28190/AT4G30520/AT4G32980/AT4G36920/AT5G03840/AT5G06250/AT5G10140/AT5G10510/AT5G11320/AT5G11530/AT5G13290/AT5G59810/AT5G60910/AT5G61850/AT5G65700	36	1326	185	21869	3.20934	4.14086e-10	4.76686e-08	4.14599e-08	*
Peaks	GO:1905393	plant organ formation	AT1G13710/AT1G24260/AT1G25220/AT1G55580/AT1G58340/AT1G68480/AT1G70510/AT2G27990/AT2G34925/AT2G37630/AT2G41370/AT2G42200/AT3G02000/AT3G02260/AT3G18550/AT3G23130/AT3G50330/AT3G54340/AT3G57130/AT4G35910/AT4G36920/AT4G38630/AT4G39400/AT5G07280/AT5G10510/AT5G20240/AT5G23000/AT5G53950/AT5G57390	29	1326	129	21869	3.70761	6.16389e-10	6.70152e-08	5.82866e-08	*
Peaks	GO:0007389	pattern specification process	AT1G10745/AT1G10747/AT1G12980/AT1G13290/AT1G14760/AT1G24260/AT1G24590/AT1G30490/AT1G32240/AT1G33240/AT1G68480/AT1G70510/AT2G21050/AT2G27990/AT2G28150/AT2G31160/AT2G34710/AT2G37630/AT2G41370/AT2G43790/AT2G46640/AT3G23130/AT3G27920/AT3G54220/AT3G54340/AT3G57130/AT4G00450/AT4G36920/AT4G37650/AT5G04810/AT5G10150/AT5G10510/AT5G13300/AT5G20240/AT5G28640/AT5G42080/AT5G56270/AT5G57390/AT5G60690	39	1326	222	21869	2.89732	1.77056e-09	1.82368e-07	1.58615e-07	*
Peaks	GO:0048646	anatomical structure formation involved in morphogenesis	AT1G13710/AT1G24260/AT1G25220/AT1G26770/AT1G26780/AT1G55580/AT1G58340/AT1G68480/AT1G70510/AT1G76420/AT2G27990/AT2G31160/AT2G34925/AT2G37630/AT2G37640/AT2G41370/AT2G42200/AT2G46410/AT3G02000/AT3G02260/AT3G18550/AT3G23130/AT3G50330/AT3G54340/AT3G57130/AT4G32980/AT4G35910/AT4G36920/AT4G38630/AT4G39400/AT5G07280/AT5G10510/AT5G14380/AT5G20240/AT5G23000/AT5G53950/AT5G57390/AT5G63090/AT5G63370	39	1326	225	21869	2.85869	2.63223e-09	2.57563e-07	2.24016e-07	*
Peaks	GO:0048449	floral organ formation	AT1G24260/AT1G68480/AT1G70510/AT3G02000/AT3G23130/AT3G50330/AT3G54340/AT4G36920/AT4G38630/AT4G39400/AT5G07280/AT5G20240	12	1326	25	21869	7.91638	5.84158e-09	5.4438e-07	4.73475e-07	*
Peaks	GO:0010022	meristem determinacy	AT1G26310/AT1G69120/AT2G22540/AT2G33860/AT2G41370/AT3G55510/AT3G57130/AT4G28190/AT5G03840/AT5G10140/AT5G11320/AT5G11530/AT5G61850	13	1326	30	21869	7.14673	6.40742e-09	5.69969e-07	4.95732e-07
Peaks	GO:0048443	stamen development	AT1G02065/AT1G08320/AT1G13400/AT1G14720/AT1G17420/AT1G68480/AT1G75520/AT2G03710/AT2G23950/AT2G36910/AT2G42200/AT3G02000/AT3G57920/AT4G13540/AT4G18960/AT4G21330/AT4G24972/AT4G25640/AT4G30520/AT4G38630/AT4G38680/AT4G39400/AT5G07280/AT5G43270/AT5G65700	25	1326	110	21869	3.74829	7.31021e-09	5.96087e-07	5.18448e-07	*
Peaks	GO:0048466	androecium development	AT1G02065/AT1G08320/AT1G13400/AT1G14720/AT1G17420/AT1G68480/AT1G75520/AT2G03710/AT2G23950/AT2G36910/AT2G42200/AT3G02000/AT3G57920/AT4G13540/AT4G18960/AT4G21330/AT4G24972/AT4G25640/AT4G30520/AT4G38630/AT4G38680/AT4G39400/AT5G07280/AT5G43270/AT5G65700	25	1326	110	21869	3.74829	7.31021e-09	5.96087e-07	5.18448e-07	*
Peaks	GO:0051239	regulation of multicellular organismal process	AT1G05100/AT1G13260/AT1G13710/AT1G16060/AT1G18750/AT1G20450/AT1G25250/AT1G26310/AT1G33240/AT1G34245/AT1G68480/AT2G19450/AT2G22540/AT2G27550/AT2G30370/AT2G36270/AT2G36400/AT2G41230/AT2G41630/AT2G43790/AT2G45650/AT2G45660/AT2G46340/AT3G03450/AT3G06500/AT3G07650/AT3G15270/AT3G17609/AT3G18550/AT3G22840/AT3G57390/AT3G61250/AT3G63530/AT4G00450/AT4G28190/AT4G29140/AT4G31380/AT4G32010/AT4G34220/AT4G35900…	61	1326	467	21869	2.15426	1.26858e-08	9.93041e-07	8.63699e-07	*
Peaks	GO:0048580	regulation of post-embryonic development	AT1G05100/AT1G13260/AT1G16060/AT1G20450/AT1G25250/AT1G26310/AT1G33240/AT1G34245/AT1G68480/AT2G19450/AT2G22540/AT2G27550/AT2G30370/AT2G36270/AT2G36400/AT2G43790/AT2G45650/AT2G45660/AT2G46340/AT3G03450/AT3G06500/AT3G07650/AT3G15270/AT3G17609/AT3G22840/AT3G57390/AT3G61250/AT4G28190/AT4G31380/AT4G32010/AT4G34220/AT4G35900/AT4G38630/AT4G39070/AT4G39400/AT5G03840/AT5G05700/AT5G08790/AT5G10140/AT5G11320…	51	1326	362	21869	2.32352	1.68659e-08	1.26948e-06	1.10413e-06	*
Peaks	GO:1905392	plant organ morphogenesis	AT1G12980/AT1G13290/AT1G13710/AT1G24260/AT1G24620/AT1G25220/AT1G25250/AT1G47485/AT1G58340/AT1G68130/AT1G68480/AT1G69320/AT1G70510/AT1G70895/AT1G71696/AT1G72490/AT1G78870/AT2G01940/AT2G21050/AT2G23760/AT2G28150/AT2G28550/AT2G34650/AT2G35612/AT2G37630/AT2G41370/AT2G42200/AT2G43790/AT2G46410/AT3G02000/AT3G02260/AT3G07390/AT3G13300/AT3G23130/AT3G50330/AT3G54340/AT3G57130/AT3G61460/AT3G63010/AT4G01060…	62	1326	485	21869	2.10831	2.18174e-08	1.58136e-06	1.37539e-06	*
Peaks	GO:2000026	regulation of multicellular organismal development	AT1G05100/AT1G13260/AT1G16060/AT1G20450/AT1G25250/AT1G26310/AT1G33240/AT1G34245/AT1G68480/AT2G19450/AT2G22540/AT2G27550/AT2G30370/AT2G36270/AT2G36400/AT2G43790/AT2G45650/AT2G45660/AT2G46340/AT3G03450/AT3G06500/AT3G07650/AT3G15270/AT3G17609/AT3G22840/AT3G57390/AT3G61250/AT4G28190/AT4G31380/AT4G32010/AT4G34220/AT4G35900/AT4G38630/AT4G39070/AT4G39400/AT5G03840/AT5G05700/AT5G08790/AT5G10140/AT5G11320…	52	1326	376	21869	2.28087	2.28979e-08	1.6004e-06	1.39195e-06	*
Peaks	GO:0006357	regulation of transcription by RNA polymerase II	AT1G03290/AT1G05710/AT1G09060/AT1G18750/AT1G23380/AT1G24260/AT1G26310/AT1G30500/AT1G32330/AT1G32640/AT1G59920/AT1G69120/AT1G70510/AT1G71692/AT1G73690/AT1G75410/AT1G75530/AT2G03710/AT2G22540/AT2G23760/AT2G27990/AT2G35940/AT2G41240/AT2G42830/AT2G45650/AT2G45660/AT2G47810/AT3G02000/AT3G02310/AT3G05690/AT3G12980/AT3G17590/AT3G17609/AT3G52100/AT3G54340/AT3G54350/AT3G57390/AT3G58780/AT3G61950/AT4G00450…	62	1326	487	21869	2.09966	2.54542e-08	1.71772e-06	1.49399e-06	*
Peaks	GO:0045893	positive regulation of transcription, DNA-templated	AT1G14760/AT1G18750/AT1G19790/AT1G24260/AT1G26310/AT1G32640/AT1G33280/AT1G34190/AT1G45249/AT1G49720/AT1G69120/AT1G71692/AT1G73690/AT1G75390/AT1G75520/AT1G75530/AT2G02070/AT2G02080/AT2G03710/AT2G22540/AT2G36270/AT2G36610/AT2G42830/AT2G45410/AT2G45650/AT2G45660/AT3G02310/AT3G03460/AT3G05700/AT3G12980/AT3G17609/AT3G19290/AT3G47610/AT3G50410/AT3G52100/AT3G54340/AT3G54350/AT3G55990/AT3G57130/AT3G57390…	61	1326	478	21869	2.10469	3.01967e-08	1.96983e-06	1.71327e-06	*
Peaks	GO:1902680	positive regulation of RNA biosynthetic process	AT1G14760/AT1G18750/AT1G19790/AT1G24260/AT1G26310/AT1G32640/AT1G33280/AT1G34190/AT1G45249/AT1G49720/AT1G69120/AT1G71692/AT1G73690/AT1G75390/AT1G75520/AT1G75530/AT2G02070/AT2G02080/AT2G03710/AT2G22540/AT2G36270/AT2G36610/AT2G42830/AT2G45410/AT2G45650/AT2G45660/AT3G02310/AT3G03460/AT3G05700/AT3G12980/AT3G17609/AT3G19290/AT3G47610/AT3G50410/AT3G52100/AT3G54340/AT3G54350/AT3G55990/AT3G57130/AT3G57390…	61	1326	480	21869	2.09592	3.52121e-08	2.15344e-06	1.87296e-06	*
Peaks	GO:1903508	positive regulation of nucleic acid-templated transcription	AT1G14760/AT1G18750/AT1G19790/AT1G24260/AT1G26310/AT1G32640/AT1G33280/AT1G34190/AT1G45249/AT1G49720/AT1G69120/AT1G71692/AT1G73690/AT1G75390/AT1G75520/AT1G75530/AT2G02070/AT2G02080/AT2G03710/AT2G22540/AT2G36270/AT2G36610/AT2G42830/AT2G45410/AT2G45650/AT2G45660/AT3G02310/AT3G03460/AT3G05700/AT3G12980/AT3G17609/AT3G19290/AT3G47610/AT3G50410/AT3G52100/AT3G54340/AT3G54350/AT3G55990/AT3G57130/AT3G57390…	61	1326	480	21869	2.09592	3.52121e-08	2.15344e-06	1.87296e-06	*
Peaks	GO:0009414	response to water deprivation	AT1G16060/AT1G20440/AT1G20450/AT1G22810/AT1G27730/AT1G32640/AT1G33240/AT1G45249/AT1G56600/AT1G62660/AT1G64670/AT1G69310/AT1G76180/AT1G78080/AT2G21660/AT2G33590/AT2G33860/AT2G36270/AT2G38530/AT2G39550/AT2G39800/AT2G41230/AT2G41240/AT2G41430/AT2G45960/AT3G02480/AT3G05500/AT3G05640/AT3G05700/AT3G14440/AT3G15500/AT3G17410/AT3G19290/AT3G23830/AT3G25760/AT3G30775/AT3G45140/AT3G46620/AT3G56880/AT3G63520…	54	1326	406	21869	2.19358	4.71243e-08	2.79461e-06	2.43062e-06	*
Peaks	GO:0045944	positive regulation of transcription by RNA polymerase II	AT1G18750/AT1G24260/AT1G26310/AT1G69120/AT1G71692/AT1G73690/AT1G75530/AT2G03710/AT2G22540/AT2G42830/AT2G45650/AT2G45660/AT3G02310/AT3G12980/AT3G17609/AT3G52100/AT3G54340/AT3G54350/AT3G57390/AT3G58780/AT4G18960/AT4G22950/AT5G09740/AT5G10140/AT5G13790/AT5G20240/AT5G23260/AT5G28640/AT5G42060/AT5G59830/AT5G60910/AT5G62165	32	1326	182	21869	2.89977	4.88095e-08	2.80942e-06	2.4435e-06	*
Peaks	GO:0010374	stomatal complex development	AT1G05100/AT1G25250/AT1G32640/AT1G33240/AT1G34245/AT1G71866/AT2G30370/AT2G43790/AT2G46410/AT3G13898/AT3G50070/AT3G63440/AT4G34160/AT4G37810/AT5G07180/AT5G10310/AT5G62230/AT5G67260	18	1326	67	21869	4.43081	5.95649e-08	3.33053e-06	2.89674e-06	*
Peaks	GO:0009415	response to water	AT1G16060/AT1G20440/AT1G20450/AT1G22810/AT1G27730/AT1G32640/AT1G33240/AT1G45249/AT1G56600/AT1G62660/AT1G64670/AT1G69310/AT1G76180/AT1G78080/AT2G21660/AT2G33590/AT2G33860/AT2G36270/AT2G38530/AT2G39550/AT2G39800/AT2G41230/AT2G41240/AT2G41430/AT2G45960/AT3G02480/AT3G05500/AT3G05640/AT3G05700/AT3G14440/AT3G15500/AT3G17410/AT3G19290/AT3G23830/AT3G25760/AT3G30775/AT3G45140/AT3G46620/AT3G56880/AT3G63520…	54	1326	416	21869	2.14085	1.06423e-07	5.78525e-06	5.03173e-06	*
Peaks	GO:0010582	floral meristem determinacy	AT1G26310/AT1G69120/AT2G22540/AT2G33860/AT2G41370/AT3G55510/AT3G57130/AT4G28190/AT5G10140/AT5G11320/AT5G61850	11	1326	26	21869	6.97758	1.29517e-07	6.8504e-06	5.95815e-06
Peaks	GO:0090697	post-embryonic plant organ morphogenesis	AT1G24260/AT1G25220/AT1G25250/AT1G68130/AT1G68480/AT1G70510/AT1G72490/AT2G01940/AT3G02000/AT3G02260/AT3G07390/AT3G23130/AT3G50330/AT3G54340/AT3G63010/AT4G35910/AT4G36920/AT4G38630/AT4G39400/AT5G07280/AT5G10510/AT5G20240/AT5G27320/AT5G57390	24	1326	120	21869	3.29849	1.94023e-07	9.99216e-06	8.6907e-06	*
Peaks	GO:0048653	anther development	AT1G02065/AT1G08320/AT1G13400/AT1G17420/AT1G68480/AT1G75520/AT2G23950/AT2G42200/AT3G02000/AT3G57920/AT4G13540/AT4G21330/AT4G24972/AT4G25640/AT4G30520/AT4G39400/AT5G07280/AT5G43270/AT5G65700	19	1326	81	21869	3.8686	2.69054e-07	1.3501e-05	1.17425e-05	*
Peaks	GO:0035670	plant-type ovary development	AT1G24260/AT1G30490/AT1G32240/AT1G75080/AT2G34710/AT2G42830/AT2G43790/AT3G02310/AT3G50330/AT3G58780/AT4G35080/AT4G36920/AT5G07180/AT5G21150/AT5G23260/AT5G62230	16	1326	60	21869	4.39799	3.59833e-07	1.76048e-05	1.53118e-05	*
Peaks	GO:0001101	response to acid chemical	AT1G16060/AT1G20440/AT1G20450/AT1G22810/AT1G27730/AT1G32640/AT1G33240/AT1G45249/AT1G56600/AT1G62660/AT1G64670/AT1G69310/AT1G76180/AT1G78080/AT2G21660/AT2G33590/AT2G33860/AT2G36270/AT2G38530/AT2G39550/AT2G39800/AT2G41230/AT2G41240/AT2G41430/AT2G43790/AT2G45960/AT3G02480/AT3G05500/AT3G05640/AT3G05700/AT3G14440/AT3G15500/AT3G17410/AT3G19290/AT3G23830/AT3G25760/AT3G30775/AT3G45140/AT3G46620/AT3G56880…	55	1326	448	21869	2.02474	5.09257e-07	2.38276e-05	2.07241e-05	*
Peaks	GO:0090696	post-embryonic plant organ development	AT1G08100/AT1G13260/AT1G24260/AT1G25220/AT1G25250/AT1G47485/AT1G64670/AT1G68130/AT1G68480/AT1G70510/AT1G72490/AT2G01940/AT2G41230/AT2G44900/AT3G02000/AT3G02260/AT3G07390/AT3G18000/AT3G23130/AT3G50330/AT3G54340/AT3G63010/AT4G31600/AT4G35910/AT4G36920/AT4G38630/AT4G39400/AT5G07280/AT5G10510/AT5G20240/AT5G27320/AT5G57390	32	1326	201	21869	2.62567	5.11373e-07	2.38276e-05	2.07241e-05	*
Peaks	GO:0003002	regionalization	AT1G13290/AT1G14760/AT1G24260/AT1G30490/AT1G32240/AT1G33240/AT1G68480/AT1G70510/AT2G21050/AT2G31160/AT2G34710/AT2G37630/AT2G41370/AT2G43790/AT2G46640/AT3G23130/AT3G27920/AT3G54220/AT3G54340/AT3G57130/AT4G00450/AT4G36920/AT4G37650/AT5G10510/AT5G13300/AT5G20240/AT5G28640/AT5G42080/AT5G57390/AT5G60690	30	1326	182	21869	2.71854	5.39445e-07	2.4551e-05	2.13533e-05	*
Peaks	GO:0009739	response to gibberellin	AT1G18080/AT1G50420/AT1G62660/AT1G75750/AT2G34340/AT2G36270/AT2G36400/AT2G36830/AT2G37640/AT2G45660/AT3G03450/AT3G13960/AT3G27920/AT3G63010/AT4G23060/AT4G36880/AT5G08520/AT5G24860/AT5G27320/AT5G39760/AT5G61850/AT5G66730/AT5G67480	23	1326	120	21869	3.16105	7.65912e-07	3.40657e-05	2.96287e-05
Peaks	GO:0048481	plant ovule development	AT1G24260/AT1G30490/AT1G32240/AT1G75080/AT2G34710/AT2G42830/AT2G43790/AT3G02310/AT3G58780/AT4G35080/AT4G36920/AT5G07180/AT5G21150/AT5G23260/AT5G62230	15	1326	58	21869	4.26529	1.27598e-06	5.54909e-05	4.82634e-05	*
Peaks	GO:0048831	regulation of shoot system development	AT1G13260/AT1G26310/AT1G68480/AT2G22540/AT2G27550/AT2G35612/AT2G45650/AT2G45660/AT3G57390/AT3G61250/AT4G28190/AT4G31380/AT4G35900/AT4G39400/AT5G03840/AT5G10140/AT5G11320/AT5G11530/AT5G13290/AT5G13790/AT5G24860/AT5G37770/AT5G41380/AT5G45300/AT5G57660/AT5G60910/AT5G62165/AT5G67100	28	1326	172	21869	2.68482	1.64617e-06	7.00337e-05	6.0912e-05	*
Peaks	GO:0009965	leaf morphogenesis	AT1G13290/AT1G13710/AT1G25250/AT1G47485/AT1G68130/AT1G68480/AT2G01940/AT2G21050/AT2G23760/AT2G35612/AT2G37630/AT2G42200/AT3G13300/AT3G57130/AT3G61460/AT4G36870/AT5G06250/AT5G08070/AT5G08520/AT5G13300/AT5G67100/AT5G67260	22	1326	118	21869	3.07487	2.14657e-06	8.93795e-05	7.77381e-05	*
Peaks	GO:0010093	specification of floral organ identity	AT1G24260/AT1G68480/AT1G70510/AT3G23130/AT3G54340/AT4G36920/AT5G20240	7	1326	13	21869	8.88055	3.68156e-06	0.0001501	0.00013055	*
Peaks	GO:0009909	regulation of flower development	AT1G13260/AT1G26310/AT1G68480/AT2G22540/AT2G27550/AT2G45650/AT2G45660/AT3G57390/AT3G61250/AT4G28190/AT4G31380/AT4G35900/AT4G39400/AT5G03840/AT5G10140/AT5G11320/AT5G11530/AT5G13290/AT5G13790/AT5G24860/AT5G37770/AT5G41380/AT5G57660/AT5G60910/AT5G62165/AT5G67100	26	1326	160	21869	2.68002	3.9572e-06	0.000158046	0.000137461	*
Peaks	GO:0090701	specification of plant organ identity	AT1G24260/AT1G68480/AT1G70510/AT3G23130/AT3G54340/AT4G36920/AT5G20240	7	1326	14	21869	8.24623	6.97643e-06	0.000273057	0.000237492	*
Peaks	GO:0051094	positive regulation of developmental process	AT1G05100/AT1G13710/AT1G26310/AT2G19450/AT2G41230/AT2G45650/AT2G45660/AT2G46410/AT3G04060/AT3G19290/AT3G22840/AT3G63530/AT4G32010/AT4G34220/AT4G35900/AT4G39070/AT4G39400/AT5G08520/AT5G11320/AT5G24860/AT5G35770/AT5G57390/AT5G60910	23	1326	137	21869	2.76881	8.06205e-06	0.000309362	0.000269068	*
Peaks	GO:0009409	response to cold	AT1G01120/AT1G01140/AT1G18740/AT1G20440/AT1G20450/AT1G27730/AT1G56600/AT1G76180/AT1G78080/AT2G19450/AT2G21060/AT2G21660/AT2G36400/AT2G40140/AT2G43790/AT2G45660/AT3G06510/AT3G13960/AT3G17390/AT3G22840/AT3G23830/AT3G25770/AT3G55990/AT3G61950/AT4G17090/AT4G22950/AT4G25470/AT4G25480/AT4G25490/AT4G34150/AT4G34710/AT4G38680/AT5G01600/AT5G01820/AT5G06070/AT5G10140/AT5G13330/AT5G20230/AT5G37770/AT5G43760…	47	1326	400	21869	1.93786	1.09871e-05	0.000413495	0.000359638
Peaks	GO:0009798	axis specification	AT1G10745/AT1G10747/AT1G12980/AT1G30490/AT1G32240/AT2G28150/AT2G34710/AT2G37630/AT2G41370/AT3G57130/AT5G10150/AT5G56270/AT5G60690	13	1326	53	21869	4.04532	1.2158e-05	0.000443655	0.00038587
Peaks	GO:0065001	specification of axis polarity	AT1G12980/AT1G30490/AT1G32240/AT2G28150/AT2G34710/AT2G37630/AT2G41370/AT3G57130/AT5G10150/AT5G60690	10	1326	32	21869	5.15389	1.22419e-05	0.000443655	0.00038587
Peaks	GO:0010103	stomatal complex morphogenesis	AT1G34245/AT1G71866/AT2G30370/AT2G46410/AT3G13898/AT3G63440/AT4G37810/AT5G07180/AT5G10310/AT5G62230	10	1326	33	21869	4.99771	1.66134e-05	0.000591134	0.00051414
Peaks	GO:0048859	formation of anatomical boundary	AT1G26780/AT1G76420/AT2G31160/AT3G23130/AT4G32980/AT5G53950/AT5G63090	7	1326	16	21869	7.21545	2.08795e-05	0.000716863	0.000623493
Peaks	GO:0090691	formation of plant organ boundary	AT1G26780/AT1G76420/AT2G31160/AT3G23130/AT4G32980/AT5G53950/AT5G63090	7	1326	16	21869	7.21545	2.08795e-05	0.000716863	0.000623493
Peaks	GO:0009651	response to salt stress	AT1G01140/AT1G09950/AT1G15100/AT1G16060/AT1G27730/AT1G45249/AT1G47485/AT1G56600/AT1G62660/AT1G69310/AT1G78080/AT2G18250/AT2G19450/AT2G21660/AT2G35612/AT2G36270/AT2G39800/AT2G43790/AT2G45640/AT2G45960/AT3G02140/AT3G03450/AT3G05700/AT3G14440/AT3G17980/AT3G19290/AT3G23830/AT3G25910/AT3G27460/AT3G48680/AT3G56880/AT3G60120/AT3G60130/AT3G61140/AT4G21870/AT4G24560/AT4G28190/AT4G32410/AT4G33950/AT4G34710…	53	1326	483	21869	1.80973	2.17967e-05	0.00073545	0.000639659	*
Peaks	GO:0009639	response to red or far red light	AT1G09570/AT1G18400/AT1G53090/AT1G75520/AT1G75540/AT1G78080/AT2G31360/AT2G35940/AT2G36910/AT2G37640/AT2G42810/AT2G42870/AT2G43010/AT2G44910/AT2G45430/AT2G46340/AT2G46970/AT3G02260/AT3G17609/AT3G22840/AT3G47710/AT3G61140/AT4G31390/AT4G32980/AT4G36880/AT4G39070/AT5G08790/AT5G28490/AT5G53660/AT5G61270/AT5G63870	31	1326	231	21869	2.21327	2.75847e-05	0.000914971	0.000795798
Peaks	GO:0009299	mRNA transcription	AT1G07090/AT1G19790/AT2G31160/AT2G42610/AT3G04510/AT3G23290/AT5G28490	7	1326	17	21869	6.79101	3.36361e-05	0.0010971	0.000954204
Peaks	GO:0071396	cellular response to lipid	AT1G05100/AT1G09950/AT1G15100/AT1G18080/AT1G19180/AT1G24625/AT1G32640/AT1G45249/AT1G49720/AT1G51800/AT1G56650/AT1G62660/AT1G66140/AT1G70700/AT1G75080/AT2G26040/AT2G30020/AT2G36830/AT2G39260/AT2G39550/AT2G41230/AT2G41370/AT2G43790/AT3G02140/AT3G03450/AT3G15210/AT3G15500/AT3G17410/AT3G17980/AT3G19290/AT3G27920/AT3G57130/AT3G61460/AT3G63010/AT4G17870/AT4G28720/AT4G33950/AT4G34220/AT4G35230/AT4G36830…	51	1326	476	21869	1.76705	5.77447e-05	0.00185256	0.00161127
Peaks	GO:0009611	response to wounding	AT1G01140/AT1G16090/AT1G17420/AT1G19180/AT1G27730/AT1G32640/AT1G32920/AT1G67560/AT1G70700/AT1G71697/AT1G73080/AT1G73260/AT1G78080/AT1G80840/AT2G30020/AT2G39260/AT2G46970/AT3G44260/AT3G45140/AT4G11280/AT4G34710/AT5G06320/AT5G08790/AT5G10300/AT5G10510/AT5G13220/AT5G20230/AT5G47910/AT5G57390/AT5G59820/AT5G67480	31	1326	243	21869	2.10398	7.32173e-05	0.00231107	0.00201006
Peaks	GO:0051093	negative regulation of developmental process	AT1G13260/AT1G16060/AT1G25250/AT1G34245/AT2G22540/AT2G27550/AT2G30370/AT2G36270/AT2G45680/AT2G46340/AT3G03450/AT3G07650/AT3G27010/AT3G57390/AT3G61150/AT3G63530/AT4G18960/AT4G28190/AT5G03840/AT5G10140/AT5G11530/AT5G13790/AT5G67100	23	1326	158	21869	2.4008	8.31961e-05	0.00258436	0.00224775	*
Peaks	GO:0010014	meristem initiation	AT1G30490/AT1G55580/AT1G76420/AT2G34710/AT2G34925/AT3G13300/AT5G23000/AT5G53950/AT5G60690	9	1326	33	21869	4.49794	0.000110267	0.00337176	0.00293259	*
Peaks	GO:0048581	negative regulation of post-embryonic development	AT1G13260/AT1G16060/AT1G25250/AT1G34245/AT2G22540/AT2G27550/AT2G30370/AT2G36270/AT2G46340/AT3G03450/AT3G07650/AT3G57390/AT4G28190/AT5G03840/AT5G10140/AT5G11530/AT5G13790/AT5G67100	18	1326	113	21869	2.62712	0.00015117	0.00455139	0.00395858	*
Peaks	GO:0051240	positive regulation of multicellular organismal process	AT1G13710/AT1G26310/AT2G19450/AT2G41230/AT2G45650/AT2G45660/AT3G22840/AT4G32010/AT4G34220/AT4G35900/AT4G39070/AT4G39400/AT5G11320/AT5G24860/AT5G35770/AT5G57390/AT5G60910	17	1326	104	21869	2.69588	0.000165578	0.00490963	0.00427016
Peaks	GO:0032350	regulation of hormone metabolic process	AT1G25220/AT1G25250/AT1G68130/AT2G01940/AT2G43010/AT4G28720/AT4G37650/AT5G43270	8	1326	28	21869	4.71213	0.000186407	0.00544475	0.00473558	*
Peaks	GO:0040008	regulation of growth	AT1G03170/AT1G13710/AT1G16060/AT1G17400/AT1G18750/AT1G32610/AT1G33240/AT1G47485/AT1G71696/AT1G72490/AT2G23950/AT2G33880/AT2G41230/AT2G41630/AT2G43790/AT2G44610/AT3G05500/AT3G05640/AT3G63430/AT3G63530/AT4G28190/AT4G29140/AT4G30520/AT4G40060/AT5G07290/AT5G08520/AT5G10510/AT5G13290/AT5G18010/AT5G35770/AT5G65700	31	1326	257	21869	1.98936	0.00020538	0.00591071	0.00514085
Peaks	GO:0042445	hormone metabolic process	AT1G25220/AT1G25250/AT1G44350/AT1G50430/AT1G68130/AT1G68460/AT1G78490/AT2G01940/AT2G28305/AT2G33860/AT2G37210/AT2G43010/AT3G63440/AT4G28720/AT4G35190/AT4G37650/AT5G11320/AT5G11950/AT5G21482/AT5G26140/AT5G43270	21	1326	147	21869	2.35607	0.000217286	0.00616274	0.00536005
Peaks	GO:0090354	regulation of auxin metabolic process	AT1G25220/AT1G25250/AT1G68130/AT2G01940/AT2G43010/AT4G28720/AT5G43270	7	1326	22	21869	5.2476	0.000225576	0.00630647	0.00548507
Peaks	GO:0010600	regulation of auxin biosynthetic process	AT1G25220/AT1G25250/AT1G68130/AT2G01940/AT2G43010/AT4G28720	6	1326	16	21869	6.18467	0.00023207	0.00630778	0.00548621
Peaks	GO:2000038	regulation of stomatal complex development	AT1G05100/AT1G25250/AT1G33240/AT1G34245/AT2G30370/AT2G43790	6	1326	16	21869	6.18467	0.00023207	0.00630778	0.00548621
Peaks	GO:0045165	cell fate commitment	AT1G24260/AT1G32240/AT1G47485/AT1G68480/AT1G69320/AT1G70895/AT2G33860/AT2G34925/AT2G46410/AT3G25905/AT3G27920/AT3G54220/AT3G57670/AT4G24972/AT5G07280/AT5G41315	16	1326	98	21869	2.69265	0.000258568	0.00693175	0.00602891	*
Peaks	GO:0009753	response to jasmonic acid	AT1G17420/AT1G19180/AT1G32640/AT1G44350/AT1G56650/AT1G70700/AT1G73080/AT2G39260/AT2G41370/AT2G43790/AT3G03450/AT3G15210/AT3G15500/AT3G27920/AT3G45140/AT3G57130/AT4G11280/AT4G34710/AT4G35890/AT5G08790/AT5G09980/AT5G13220/AT5G13330/AT5G41315/AT5G67300/AT5G67480	26	1326	204	21869	2.10198	0.000273819	0.00724141	0.00629823
Peaks	GO:0051241	negative regulation of multicellular organismal process	AT1G13260/AT1G16060/AT1G25250/AT1G34245/AT2G22540/AT2G27550/AT2G30370/AT2G36270/AT2G46340/AT3G03450/AT3G07650/AT3G57390/AT3G63530/AT4G28190/AT5G03840/AT5G10140/AT5G11530/AT5G13790/AT5G67100	19	1326	129	21869	2.42912	0.000286463	0.00747478	0.00650121	*
Peaks	GO:0009733	response to auxin	AT1G24590/AT1G30330/AT1G47485/AT1G56650/AT1G75580/AT2G33860/AT2G34650/AT2G36910/AT2G39550/AT2G43010/AT3G02260/AT3G07390/AT3G13300/AT3G17600/AT3G50410/AT3G51670/AT4G09160/AT4G11280/AT4G27260/AT4G27280/AT4G29080/AT4G34410/AT4G34770/AT4G34780/AT4G34790/AT4G34800/AT4G37260/AT4G38630/AT5G07990/AT5G10510/AT5G10990/AT5G13300/AT5G13790/AT5G37770/AT5G43700/AT5G57390/AT5G57560/AT5G67300/AT5G67480	39	1326	358	21869	1.79666	0.000294112	0.00757338	0.00658696
Peaks	GO:0010074	maintenance of meristem identity	AT1G69120/AT1G69320/AT1G70895/AT2G03710/AT2G22540/AT2G27990/AT2G31160/AT2G45660/AT5G10510/AT5G13290/AT5G59810/AT5G60910/AT5G61850	13	1326	71	21869	3.01975	0.000303747	0.0077121	0.00670761
Peaks	GO:0009944	polarity specification of adaxial/abaxial axis	AT1G30490/AT1G32240/AT2G34710/AT2G37630/AT2G41370/AT3G57130/AT5G60690	7	1326	23	21869	5.01944	0.00030738	0.0077121	0.00670761
Peaks	GO:0009637	response to blue light	AT1G09570/AT1G10120/AT1G53090/AT1G75100/AT2G30520/AT2G36910/AT2G43010/AT2G44830/AT2G46340/AT3G22840/AT4G31390/AT4G40060/AT5G28490/AT5G39760/AT5G63870	15	1326	90	21869	2.74874	0.00031658	0.00784237	0.00682092
Peaks	GO:0010228	vegetative to reproductive phase transition of meristem	AT1G18080/AT1G25560/AT1G47485/AT1G71692/AT2G21660/AT2G27550/AT2G27990/AT2G28550/AT2G42200/AT2G45430/AT2G45650/AT2G46340/AT3G07650/AT3G48680/AT3G57390/AT3G57920/AT4G00450/AT4G01060/AT4G31380/AT4G32980/AT4G35900/AT4G38680/AT4G40060/AT5G01040/AT5G03840/AT5G13790/AT5G24860/AT5G37770/AT5G47640	29	1326	241	21869	1.98457	0.00033741	0.00825388	0.00717883
Peaks	GO:0009933	meristem structural organization	AT1G30490/AT1G55580/AT1G69120/AT1G75820/AT1G76420/AT2G34710/AT2G34925/AT3G13300/AT5G06070/AT5G23000/AT5G53950/AT5G60690/AT5G65700	13	1326	72	21869	2.97781	0.000350396	0.00845531	0.00735403	*
Peaks	GO:0001708	cell fate specification	AT1G24260/AT1G32240/AT1G68480/AT2G33860/AT2G46410/AT3G27920/AT3G54220/AT5G07280/AT5G41315	9	1326	38	21869	3.90611	0.000354285	0.00845531	0.00735403	*
Peaks	GO:0070542	response to fatty acid	AT1G17420/AT1G19180/AT1G32640/AT1G44350/AT1G56650/AT1G70700/AT1G73080/AT2G39260/AT2G41370/AT2G43790/AT3G03450/AT3G15210/AT3G15500/AT3G27920/AT3G45140/AT3G57130/AT4G11280/AT4G34710/AT4G35890/AT5G08790/AT5G09980/AT5G13220/AT5G13330/AT5G41315/AT5G67300/AT5G67480	26	1326	208	21869	2.06156	0.000371837	0.0087673	0.00762538
Peaks	GO:0023051	regulation of signaling	AT1G05100/AT1G09950/AT1G15100/AT1G18080/AT1G19180/AT1G19770/AT1G24625/AT1G51800/AT1G66140/AT1G70700/AT1G75820/AT1G79070/AT1G80440/AT2G36910/AT2G39550/AT2G41230/AT2G43010/AT3G02140/AT3G03450/AT3G03773/AT3G15210/AT3G17410/AT3G17980/AT3G63010/AT4G24580/AT4G33950/AT4G34220/AT4G34410/AT4G37260/AT4G39070/AT5G01810/AT5G08520/AT5G13220/AT5G27320/AT5G53160/AT5G66730/AT5G67300	37	1326	340	21869	1.79477	0.000423524	0.0098671	0.00858193
Peaks	GO:0010817	regulation of hormone levels	AT1G10030/AT1G19770/AT1G25220/AT1G25250/AT1G44350/AT1G50430/AT1G68130/AT1G68460/AT1G78490/AT2G01940/AT2G28305/AT2G33860/AT2G34650/AT2G36910/AT2G37210/AT2G43010/AT3G02260/AT3G03773/AT3G51670/AT3G63440/AT4G09160/AT4G28720/AT4G35190/AT4G37650/AT5G11320/AT5G11950/AT5G13750/AT5G18010/AT5G21482/AT5G26140/AT5G43270	31	1326	268	21869	1.90771	0.00042941	0.00988654	0.00859884
Peaks	GO:0048532	anatomical structure arrangement	AT1G30490/AT1G55580/AT1G69120/AT1G75820/AT1G76420/AT2G34710/AT2G34925/AT3G13300/AT5G06070/AT5G06250/AT5G23000/AT5G53950/AT5G60690/AT5G65700	14	1326	84	21869	2.74874	0.000495776	0.011189	0.00973168	*
Peaks	GO:0010200	response to chitin	AT1G27730/AT1G51800/AT2G33580/AT2G40140/AT3G55980/AT3G61460/AT5G59820/AT5G67450	8	1326	32	21869	4.12311	0.00050791	0.011189	0.00973168
Peaks	GO:0042127	regulation of cell population proliferation	AT1G13245/AT1G13710/AT2G33880/AT2G36400/AT2G39705/AT3G23130/AT3G50070/AT3G57920/AT3G63530/AT4G32980/AT4G34160/AT4G35783/AT4G37740/AT5G58650/AT5G67260	15	1326	94	21869	2.63178	0.000512163	0.011189	0.00973168
Peaks	GO:0042446	hormone biosynthetic process	AT1G25220/AT1G25250/AT1G50430/AT1G68130/AT1G68460/AT1G78490/AT2G01940/AT2G28305/AT2G37210/AT2G43010/AT4G28720/AT4G35190/AT5G11320/AT5G11950/AT5G26140	15	1326	94	21869	2.63178	0.000512163	0.011189	0.00973168
Peaks	GO:0009640	photomorphogenesis	AT1G09570/AT1G53090/AT1G75520/AT1G75540/AT2G36910/AT2G43010/AT2G45430/AT2G46340/AT3G02260/AT3G17609/AT3G47710/AT3G61140/AT4G32980/AT4G39070/AT5G08790/AT5G61270	16	1326	104	21869	2.5373	0.000514569	0.011189	0.00973168
Peaks	GO:0010646	regulation of cell communication	AT1G05100/AT1G09950/AT1G15100/AT1G18080/AT1G19180/AT1G19770/AT1G24625/AT1G51800/AT1G66140/AT1G70700/AT1G75820/AT1G79070/AT1G80440/AT2G36910/AT2G39550/AT2G41230/AT2G43010/AT3G02140/AT3G03450/AT3G03773/AT3G15210/AT3G17410/AT3G17980/AT3G63010/AT4G24580/AT4G33950/AT4G34220/AT4G34410/AT4G37260/AT4G39070/AT5G01810/AT5G08520/AT5G13220/AT5G27320/AT5G53160/AT5G66730/AT5G67300	37	1326	344	21869	1.7739	0.00052928	0.0113824	0.0098999
Peaks	GO:0019827	stem cell population maintenance	AT1G19050/AT1G69120/AT1G69320/AT1G70895/AT2G03710/AT2G22540/AT2G27990/AT2G31160/AT2G45660/AT5G10510/AT5G13290/AT5G59810/AT5G60910/AT5G61850	14	1326	85	21869	2.7164	0.000560971	0.0118045	0.010267
Peaks	GO:0098727	maintenance of cell number	AT1G19050/AT1G69120/AT1G69320/AT1G70895/AT2G03710/AT2G22540/AT2G27990/AT2G31160/AT2G45660/AT5G10510/AT5G13290/AT5G59810/AT5G60910/AT5G61850	14	1326	85	21869	2.7164	0.000560971	0.0118045	0.010267
Peaks	GO:0009966	regulation of signal transduction	AT1G05100/AT1G09950/AT1G15100/AT1G18080/AT1G19180/AT1G19770/AT1G24625/AT1G51800/AT1G66140/AT1G70700/AT1G75820/AT1G80440/AT2G36910/AT2G39550/AT2G41230/AT2G43010/AT3G02140/AT3G03450/AT3G03773/AT3G15210/AT3G17410/AT3G17980/AT3G63010/AT4G24580/AT4G33950/AT4G34220/AT4G34410/AT4G37260/AT4G39070/AT5G01810/AT5G08520/AT5G13220/AT5G27320/AT5G53160/AT5G66730/AT5G67300	36	1326	334	21869	1.77763	0.000601089	0.0125142	0.0108842
Peaks	GO:0009910	negative regulation of flower development	AT1G13260/AT2G22540/AT2G27550/AT3G57390/AT4G28190/AT5G03840/AT5G10140/AT5G11530/AT5G13790/AT5G67100	10	1326	49	21869	3.36581	0.000607977	0.0125243	0.0108931
Peaks	GO:0009411	response to UV	AT1G27840/AT1G67500/AT1G73805/AT2G02090/AT2G06040/AT2G36910/AT2G43790/AT3G15620/AT3G17609/AT3G22840/AT4G38620/AT4G39400/AT5G07990/AT5G09740/AT5G17780/AT5G23730/AT5G59820/AT5G63860	18	1326	127	21869	2.33751	0.000655186	0.0133562	0.0116166
Peaks	GO:0008361	regulation of cell size	AT1G33240/AT2G36910/AT2G45680/AT3G23130/AT3G27010/AT3G57920/AT5G08790	7	1326	26	21869	4.44028	0.000702738	0.0138915	0.0120822
Peaks	GO:0009880	embryonic pattern specification	AT1G10745/AT1G10747/AT1G12980/AT1G24590/AT1G30490/AT5G04810/AT5G56270	7	1326	26	21869	4.44028	0.000702738	0.0138915	0.0120822
Peaks	GO:0009956	radial pattern formation	AT2G46640/AT3G54220/AT4G00450/AT4G37650/AT5G10510/AT5G57390/AT5G60690	7	1326	26	21869	4.44028	0.000702738	0.0138915	0.0120822
Peaks	GO:0009606	tropism	AT1G09570/AT1G17400/AT1G25250/AT1G56590/AT1G68130/AT1G72490/AT2G01940/AT2G30520/AT2G34650/AT2G36910/AT2G43010/AT2G44830/AT3G17600/AT3G54220/AT4G37650/AT5G06140/AT5G13750/AT5G67270	18	1326	128	21869	2.31925	0.000720065	0.0140917	0.0122563
Peaks	GO:2000241	regulation of reproductive process	AT1G13260/AT1G18750/AT1G26310/AT1G32610/AT1G68480/AT2G22540/AT2G27550/AT2G41630/AT2G45650/AT2G45660/AT2G46340/AT2G46980/AT3G03272/AT3G03450/AT3G07650/AT3G57390/AT3G57860/AT3G61250/AT4G13540/AT4G28190/AT4G31380/AT4G32010/AT4G35900/AT4G39400/AT5G03840/AT5G07290/AT5G10140/AT5G10510/AT5G11320/AT5G11530/AT5G13290/AT5G13790/AT5G23260/AT5G24860/AT5G37770/AT5G41380/AT5G57660/AT5G60910/AT5G62165/AT5G67100	40	1326	388	21869	1.70025	0.00074884	0.0145097	0.0126199
Peaks	GO:0045892	negative regulation of transcription, DNA-templated	AT1G13260/AT1G27730/AT1G30500/AT1G33240/AT1G75080/AT1G80840/AT2G22540/AT2G36080/AT2G37630/AT2G42870/AT2G45640/AT3G02000/AT3G02140/AT3G15210/AT3G23130/AT3G48710/AT3G52100/AT4G38620/AT5G06250/AT5G08790/AT5G09740/AT5G11530/AT5G13790/AT5G40800/AT5G63350/AT5G67450	26	1326	219	21869	1.95801	0.000817	0.0156752	0.0136335
Peaks	GO:0072330	monocarboxylic acid biosynthetic process	AT1G01120/AT1G06080/AT1G06090/AT1G13280/AT1G16060/AT1G17420/AT1G64670/AT1G67560/AT1G67730/AT1G73805/AT1G79700/AT2G31360/AT2G44620/AT2G45690/AT2G46720/AT3G14440/AT3G23820/AT3G25760/AT3G25770/AT3G25780/AT3G45140/AT4G13840/AT4G30950/AT4G33950/AT4G36830/AT5G08520/AT5G43760/AT5G47630	28	1326	243	21869	1.90037	0.000843589	0.0160282	0.0139406
Peaks	GO:0008283	cell population proliferation	AT1G13245/AT1G13710/AT2G33880/AT2G36400/AT2G39705/AT3G23130/AT3G50070/AT3G57920/AT3G63530/AT4G32980/AT4G34160/AT4G35783/AT4G37740/AT5G28640/AT5G58650/AT5G67260	16	1326	109	21869	2.42091	0.000870744	0.0163851	0.0142509
Peaks	GO:0042761	very long-chain fatty acid biosynthetic process	AT1G01120/AT1G06080/AT1G67730/AT2G31360/AT4G13840/AT4G36830	6	1326	20	21869	4.94774	0.000910821	0.016976	0.0147649
Peaks	GO:1902679	negative regulation of RNA biosynthetic process	AT1G13260/AT1G27730/AT1G30500/AT1G33240/AT1G75080/AT1G80840/AT2G22540/AT2G36080/AT2G37630/AT2G42870/AT2G45640/AT3G02000/AT3G02140/AT3G15210/AT3G23130/AT3G48710/AT3G52100/AT4G38620/AT5G06250/AT5G08790/AT5G09740/AT5G11530/AT5G13790/AT5G40800/AT5G63350/AT5G67450	26	1326	221	21869	1.94029	0.000935139	0.0171034	0.0148757
Peaks	GO:1903507	negative regulation of nucleic acid-templated transcription	AT1G13260/AT1G27730/AT1G30500/AT1G33240/AT1G75080/AT1G80840/AT2G22540/AT2G36080/AT2G37630/AT2G42870/AT2G45640/AT3G02000/AT3G02140/AT3G15210/AT3G23130/AT3G48710/AT3G52100/AT4G38620/AT5G06250/AT5G08790/AT5G09740/AT5G11530/AT5G13790/AT5G40800/AT5G63350/AT5G67450	26	1326	221	21869	1.94029	0.000935139	0.0171034	0.0148757
Peaks	GO:0048584	positive regulation of response to stimulus	AT1G05100/AT1G15100/AT1G18080/AT1G18400/AT1G32540/AT1G51800/AT1G64670/AT1G73805/AT2G33860/AT2G41370/AT2G43790/AT3G05500/AT3G15210/AT3G17410/AT3G17980/AT3G57130/AT3G57710/AT3G57860/AT3G63010/AT4G17870/AT4G24970/AT4G33950/AT4G34220/AT4G37260/AT4G39070/AT5G25440/AT5G27320/AT5G53160/AT5G67300	29	1326	258	21869	1.8538	0.00102145	0.018509	0.0160983
Peaks	GO:0009943	adaxial/abaxial axis specification	AT1G30490/AT1G32240/AT2G34710/AT2G37630/AT2G41370/AT3G57130/AT5G60690	7	1326	28	21869	4.12311	0.00113719	0.0204075	0.0177495
Peaks	GO:0045934	negative regulation of nucleobase-containing compound metabolic process	AT1G13260/AT1G27730/AT1G30500/AT1G33240/AT1G75080/AT1G80840/AT2G22540/AT2G36080/AT2G37630/AT2G42870/AT2G45640/AT3G02000/AT3G02140/AT3G15210/AT3G15605/AT3G23130/AT3G48710/AT3G52100/AT4G38620/AT5G06250/AT5G06310/AT5G08780/AT5G08790/AT5G09740/AT5G11530/AT5G13790/AT5G40800/AT5G63350/AT5G67450	29	1326	260	21869	1.83954	0.00115259	0.0204075	0.0177495
Peaks	GO:0040034	regulation of development, heterochronic	AT1G69440/AT1G75410/AT3G06500/AT3G47710/AT4G00450/AT4G22950/AT4G40060/AT5G08070/AT5G43270/AT5G53950	10	1326	53	21869	3.11178	0.0011575	0.0204075	0.0177495
Peaks	GO:0009691	cytokinin biosynthetic process	AT1G68460/AT2G28305/AT2G37210/AT4G35190/AT5G11950/AT5G26140	6	1326	21	21869	4.71213	0.00121025	0.0207759	0.0180699
Peaks	GO:0010052	guard cell differentiation	AT1G34245/AT1G71866/AT2G30370/AT3G13898/AT4G37810/AT5G10310	6	1326	21	21869	4.71213	0.00121025	0.0207759	0.0180699
Peaks	GO:0046885	regulation of hormone biosynthetic process	AT1G25220/AT1G25250/AT1G68130/AT2G01940/AT2G43010/AT4G28720	6	1326	21	21869	4.71213	0.00121025	0.0207759	0.0180699
Peaks	GO:0090626	plant epidermis morphogenesis	AT1G33240/AT1G34245/AT1G71866/AT2G30370/AT2G46410/AT3G13898/AT3G27920/AT3G63440/AT4G20780/AT4G37810/AT5G07180/AT5G10310/AT5G41315/AT5G42080/AT5G62230	15	1326	103	21869	2.40181	0.00135229	0.0230124	0.0200151
Peaks	GO:0010224	response to UV-B	AT1G27840/AT1G67500/AT1G73805/AT2G43790/AT3G17609/AT4G38620/AT4G39400/AT5G09740/AT5G17780/AT5G23730/AT5G59820/AT5G63860	12	1326	73	21869	2.71109	0.00138436	0.023355	0.0203131
Peaks	GO:0048825	cotyledon development	AT1G12980/AT1G13290/AT1G24590/AT2G21050/AT2G34650/AT2G46310/AT4G11140/AT5G11320/AT5G28640/AT5G53290	10	1326	56	21869	2.94508	0.00179265	0.0299848	0.0260794
Peaks	GO:0051253	negative regulation of RNA metabolic process	AT1G13260/AT1G27730/AT1G30500/AT1G33240/AT1G75080/AT1G80840/AT2G22540/AT2G36080/AT2G37630/AT2G42870/AT2G45640/AT3G02000/AT3G02140/AT3G15210/AT3G23130/AT3G48710/AT3G52100/AT4G38620/AT5G06250/AT5G08790/AT5G09740/AT5G11530/AT5G13790/AT5G40800/AT5G63350/AT5G67450	26	1326	232	21869	1.84829	0.00188659	0.0309274	0.0268992
Peaks	GO:0009308	amine metabolic process	AT1G25220/AT1G32640/AT1G68460/AT2G28305/AT2G37210/AT2G40000/AT3G02470/AT3G18000/AT3G63440/AT4G34180/AT4G34410/AT4G34710/AT4G35190/AT5G11950/AT5G17990/AT5G21482/AT5G26140	17	1326	128	21869	2.1904	0.0018879	0.0309274	0.0268992
Peaks	GO:0080134	regulation of response to stress	AT1G09950/AT1G15100/AT1G19180/AT1G32540/AT1G32640/AT1G44350/AT1G51800/AT1G64670/AT1G70700/AT1G73805/AT1G80840/AT2G28550/AT2G33860/AT2G37630/AT2G41230/AT2G41370/AT2G43790/AT3G05500/AT3G10040/AT3G15210/AT3G17410/AT3G17980/AT3G48710/AT3G57130/AT3G57710/AT3G57860/AT4G17870/AT4G24560/AT4G24970/AT4G28190/AT4G29140/AT4G37260/AT5G08520/AT5G11530/AT5G13220/AT5G18650/AT5G25440/AT5G44585/AT5G52440/AT5G67300	40	1326	408	21869	1.61691	0.00192499	0.0309274	0.0268992
Peaks	GO:0010075	regulation of meristem growth	AT1G03170/AT1G13710/AT1G71696/AT2G23950/AT2G33880/AT2G43790/AT4G28190/AT4G30520/AT5G10510/AT5G13290/AT5G65700	11	1326	66	21869	2.74874	0.00192802	0.0309274	0.0268992
Peaks	GO:0010114	response to red light	AT1G09570/AT2G31360/AT2G37640/AT2G43010/AT2G46340/AT3G17609/AT3G22840/AT4G31390/AT4G36880/AT5G28490/AT5G53660	11	1326	66	21869	2.74874	0.00192802	0.0309274	0.0268992
Peaks	GO:2000242	negative regulation of reproductive process	AT1G13260/AT2G22540/AT2G27550/AT3G07650/AT3G57390/AT4G13540/AT4G28190/AT5G03840/AT5G10140/AT5G11530/AT5G13790/AT5G67100	12	1326	76	21869	2.60407	0.00197681	0.0312036	0.0271394
Peaks	GO:0009629	response to gravity	AT1G09570/AT1G17400/AT1G25250/AT1G56590/AT1G68130/AT1G72490/AT2G01940/AT2G34650/AT2G36910/AT3G17600/AT3G54220/AT4G37650/AT5G06140/AT5G13750/AT5G51820	15	1326	107	21869	2.31203	0.00199307	0.0312036	0.0271394
Peaks	GO:0009867	jasmonic acid mediated signaling pathway	AT1G19180/AT1G32640/AT1G56650/AT1G70700/AT2G39260/AT2G41370/AT2G43790/AT3G03450/AT3G15210/AT3G15500/AT3G27920/AT3G57130/AT5G13220/AT5G41315/AT5G67300	15	1326	107	21869	2.31203	0.00199307	0.0312036	0.0271394
Peaks	GO:1902584	positive regulation of response to water deprivation	AT1G64670/AT2G33860/AT3G05500/AT3G17410/AT4G17870	5	1326	16	21869	5.15389	0.0020226	0.0314145	0.0273228
Peaks	GO:0009630	gravitropism	AT1G09570/AT1G17400/AT1G25250/AT1G56590/AT1G68130/AT1G72490/AT2G01940/AT2G34650/AT2G36910/AT3G17600/AT3G54220/AT4G37650/AT5G06140/AT5G13750	14	1326	97	21869	2.38035	0.00210173	0.0321455	0.0279586
Peaks	GO:0009864	induced systemic resistance, jasmonic acid mediated signaling pathway	AT2G41370/AT2G43790/AT3G15210/AT3G57130	4	1326	10	21869	6.59698	0.00210251	0.0321455	0.0279586
Peaks	GO:0048582	positive regulation of post-embryonic development	AT1G26310/AT2G19450/AT2G45650/AT2G45660/AT3G22840/AT4G32010/AT4G34220/AT4G35900/AT4G39070/AT4G39400/AT5G11320/AT5G24860/AT5G60910	13	1326	87	21869	2.46439	0.00218115	0.0328596	0.0285797
Peaks	GO:0043455	regulation of secondary metabolic process	AT1G18400/AT1G64670/AT1G80440/AT4G27260/AT4G32980/AT4G38620/AT4G39940/AT5G08520/AT5G20230/AT5G23260/AT5G65410	11	1326	67	21869	2.70772	0.0021828	0.0328596	0.0285797
Peaks	GO:0009690	cytokinin metabolic process	AT1G68460/AT2G28305/AT2G37210/AT3G63440/AT4G35190/AT5G11950/AT5G21482/AT5G26140	8	1326	40	21869	3.29849	0.00241291	0.0360463	0.0313513
Peaks	GO:0009695	jasmonic acid biosynthetic process	AT1G13280/AT1G17420/AT1G67560/AT3G25760/AT3G25770/AT3G25780/AT3G45140	7	1326	32	21869	3.60773	0.00261456	0.0387628	0.033714
Peaks	GO:0009631	cold acclimation	AT1G18740/AT1G20440/AT1G20450/AT1G76180/AT3G61950/AT4G25470/AT4G25480/AT4G25490/AT4G38680/AT5G59820	10	1326	59	21869	2.79533	0.0026836	0.0394872	0.0343441
Peaks	GO:0000038	very long-chain fatty acid metabolic process	AT1G01120/AT1G06080/AT1G67730/AT2G31360/AT2G45670/AT2G46720/AT4G13840/AT4G36830	8	1326	41	21869	3.21804	0.0028412	0.0405856	0.0352994
Peaks	GO:0001763	morphogenesis of a branching structure	AT1G55580/AT1G72490/AT2G27990/AT2G34925/AT2G46640/AT3G18550/AT5G23000/AT5G53950	8	1326	41	21869	3.21804	0.0028412	0.0405856	0.0352994
Peaks	GO:0009911	positive regulation of flower development	AT1G26310/AT2G45650/AT2G45660/AT4G35900/AT4G39400/AT5G11320/AT5G24860/AT5G60910	8	1326	41	21869	3.21804	0.0028412	0.0405856	0.0352994
Peaks	GO:0009955	adaxial/abaxial pattern specification	AT1G30490/AT1G32240/AT2G34710/AT2G37630/AT2G41370/AT3G57130/AT5G28640/AT5G60690	8	1326	41	21869	3.21804	0.0028412	0.0405856	0.0352994
Peaks	GO:0071395	cellular response to jasmonic acid stimulus	AT1G19180/AT1G32640/AT1G56650/AT1G70700/AT2G39260/AT2G41370/AT2G43790/AT3G03450/AT3G15210/AT3G15500/AT3G27920/AT3G57130/AT5G13220/AT5G41315/AT5G67300	15	1326	111	21869	2.22871	0.00286846	0.0406781	0.0353799
Peaks	GO:0019748	secondary metabolic process	AT1G18400/AT1G18590/AT1G24625/AT1G32640/AT1G64670/AT1G66140/AT1G73270/AT1G80440/AT2G22990/AT2G23000/AT2G43790/AT3G14210/AT3G17390/AT3G19290/AT3G19450/AT3G50740/AT3G60120/AT3G60130/AT4G01070/AT4G12910/AT4G27260/AT4G30210/AT4G32980/AT4G34230/AT4G37260/AT4G37400/AT4G38620/AT4G39940/AT5G06370/AT5G08520/AT5G13330/AT5G20230/AT5G23020/AT5G23260/AT5G62480/AT5G65410	36	1326	367	21869	1.61779	0.00311719	0.0437102	0.038017
Peaks	GO:0009743	response to carbohydrate	AT1G01140/AT1G18080/AT1G19200/AT1G43670/AT1G45249/AT1G56650/AT1G66180/AT2G19450/AT2G36270/AT2G39990/AT3G22550/AT3G54320/AT4G24400/AT4G34160/AT4G38630/AT4G39795/AT5G01820/AT5G03840/AT5G08790	19	1326	157	21869	1.9959	0.00312694	0.0437102	0.038017
Peaks	GO:0009845	seed germination	AT1G16060/AT1G18080/AT1G18580/AT1G20450/AT1G24260/AT1G75390/AT2G19450/AT2G36270/AT3G03450/AT3G06500/AT3G22840/AT4G18010/AT4G27490/AT4G32010/AT4G34220/AT4G36880/AT4G38630/AT5G05700/AT5G57390/AT5G57710/AT5G66730	21	1326	182	21869	1.90298	0.00348374	0.0483524	0.0420546
Peaks	GO:0046620	regulation of organ growth	AT1G13710/AT2G41230/AT3G63530/AT4G29140/AT5G35770	5	1326	18	21869	4.58124	0.00358478	0.0494043	0.0429695
